# Supplementary material for: Rh(iii)-Catalyzed dienylation and cyclopropylation of indoles at the C4 position with alkylidenecyclopropanes
Source: Royal Society of Chemistry journal article supplement (doi:10.1039/d2qo00763k), 2022-01-01
Supplement: d2qo00763k1.pdf [file d2qo00763k1.pdf]

## Rh(III)-Catalyzed Dienylation and Cyclopropylation of Indoles at C4 Position with Alkylidenecyclopropanes

Yan-Zhi Liu,<sup>a</sup> Yao-Fu Zeng,<sup>\*b</sup> Bing Shu,<sup>c</sup> Yi-Chuan Zheng,<sup>a</sup> Lin Xiao,<sup>a</sup> Shao-Yong Chen,<sup>a</sup> Jia-Lin Song,<sup>a</sup> Xuanxuan Zhang,<sup>\*a</sup> Shang-Shi Zhang<sup>\*a</sup>

<sup>a</sup>Center for Drug Research and Development, Guangdong Pharmaceutical University, Guangzhou, 510006, China.

<sup>b</sup>School of Pharmaceutical Science, Hunan Provincial Key Laboratory of Tumor Microenvironment Responsive Drug Research, Hengyang Medical School, University of South China, Hengyang, Hunan, 421001, China.

<sup>c</sup>School of Pharmacy, Guangdong Pharmaceutical University, Guangzhou, 510006, PR China.

\*E-mail: [zhangshangshi@gdpu.edu.cn](mailto:zhangshangshi@gdpu.edu.cn)

\*E-mail: [phil2424123@163.com](mailto:phil2424123@163.com)

\*E-mail: [zengyf@usc.edu.cn](mailto:zengyf@usc.edu.cn).

### Supporting Information

|                                                    |    |
|----------------------------------------------------|----|
| 1. General information .....                       | 2  |
| 2. Preparation of starting materials .....         | 3  |
| 3. General procedure for the product .....         | 5  |
| 4. Product characterization.....                   | 6  |
| 5. Mechanistic studies .....                       | 27 |
| 6. Synthetic application of the product .....      | 31 |
| 7. X-Ray crystal data for compound <b>4n</b> ..... | 33 |
| 8. Copies of product NMR spectra.....              | 40 |
| 9. Reference .....                                 | 86 |

## 1. General information

Unless otherwise noted, all reactions were carried out at room temperature under an atmosphere of nitrogen with flame-dried glassware. If reaction was not conducted at room temperature, reaction temperatures are reported as the temperature of the bath surrounding the vessel unless otherwise stated. The dry solvents used were purified by distillation over the drying agents indicated in parentheses and were transferred under nitrogen: THF (Na-benzophenone), 1,2-dichloroethane (CaH<sub>2</sub>), dichloromethane (CaH<sub>2</sub>). Anhydrous DCM, MeOH, DMF and 1,4-dioxane etc. were purchased from Acros Organics and stored under nitrogen atmosphere. Commercially available chemicals were obtained from commercial suppliers and used without further purification unless otherwise stated.

Proton NMR (<sup>1</sup>H) were recorded at 400 MHz, and Carbon NMR (<sup>13</sup>C) at 101 MHz NMR spectrometer unless otherwise stated. The following abbreviations are used for the multiplicities: s: singlet, d: doublet, t: triplet, q: quartet, m: multiplet, br s: broad singlet for proton spectra. Coupling constants (*J*) are reported in Hertz (Hz).

High-resolution mass spectra (HRMS) were recorded on a BRUKER VPEXII spectrometer with EI and ESI mode unless otherwise stated.

Analytical thin layer chromatography was performed on Polygram SIL G/UV254 plates. Visualization was accomplished with short wave UV light, or KMnO<sub>4</sub> staining solutions followed by heating. Flash column chromatography was performed using silica gel (200-300 mesh) with solvents distilled prior to use.

No attempts were made to optimize yields for substrate synthesis.

## 2. Preparation of starting materials

### (1) The synthesis of indole substrates<sup>1</sup>

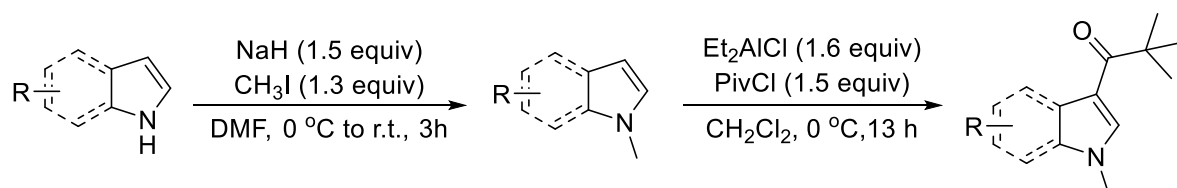

**1-methyl-1*H*-indole:** NaH (1.1 g, 65% dispersion in mineral oil, 30.0 mmol) was slowly added into the solution of indole (2.34 g, 20.0 mmol) in DMF (10.0 mL) at 0 °C. The heterogeneous mixture was stirred at 0 °C for 10.0 min and 1 h at room temperature. The mixture was then cooled to 0 °C and then iodomethane (1.60 mL, 23.0 mmol) was added. After 3 h, the reaction mixture was cooled to 0 °C, quenched with saturated NH<sub>4</sub>Cl (40.0 mL) and water (100.0 mL). The organic phase was extracted by EtOAc and dried over anhydrous Na<sub>2</sub>SO<sub>4</sub>. The product was obtained by column chromatography on silica gel (PE : EA 100:1, yellow oil, 2.57 g, 98 %).

**2,2-dimethyl-1-(1-methyl-1*H*-indole-3-yl) propan-1-one:** To a CH<sub>2</sub>Cl<sub>2</sub> solution of indole derivative was added Et<sub>2</sub>AlCl (1.6 equiv, 2.0 M in hexane) at 0 °C. The mixture was stirred at 0 °C for 1 h. To this solution was added dropwise a CH<sub>2</sub>Cl<sub>2</sub> solution of PivCl (1.5 equiv) at 0 °C. The resulting solution was stirred at 0 °C for 12 h, and pH 7.0 aqueous buffer solution was added to quench the reaction, Then the mixture was extracted with CH<sub>2</sub>Cl<sub>2</sub> or ethyl acetate and dried over Na<sub>2</sub>SO<sub>4</sub>. The crude product was purified by chromatography on silica gel (PE : EA 16:1).

### (2) (cyclopropylidene)methyl)benzene was prepared according to the reported procedure as following depicted.<sup>2</sup>

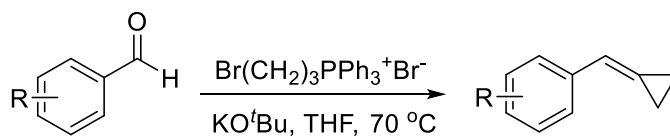

**(cyclopropylidene)methyl)benzene:** A solution of KO<sup>t</sup>Bu (3.36 g, 30 mmol, 3.0 equiv) in THF (20.0 mL, 1.5 M) was slowly added to a solution of (3-bromopropyl)triphenylphosphonium bromide (6.96 g, 15 mmol, 1.5 equiv) in dry THF (30.0 mL, 0.5 M) and stirred at 70 °C for 1.0 h. Then a THF solution of 4-(tert-butyl)benzaldehyde (1.62 g, 10 mmol, 2.0 M in THF, 1.0 equiv) was added dropwise and the mixture was refluxed for 3.0 h. After cooling, the suspension was filtered and the

solvent of the filtrate was removed under vacuum, the products were purified by column chromatography on silica gel, eluting with petroleum to afford 1-(tert-butyl)-4-(cyclopropylidene)methylbenzene (783 mg, 42 %).

### 3. General procedure for the product

#### (1) General procedure A

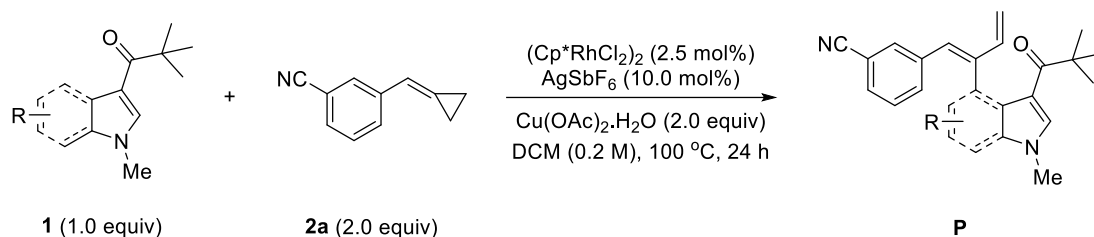

To a Schlenk tube, 2,2-dimethyl-1-(1-methyl-1*H*-indole-3-yl)propan-1-one **1** (0.2 mmol, 1.0 equiv), 3-(cyclopropylidene)benzonitrile **2** (31.0 mg, 0.4 mmol, 2.0 equiv),  $(\text{Cp}^*\text{RhCl}_2)_2$  (3.2 mg, 0.005 mmol, 2.5 mmol%),  $\text{AgSbF}_6$  (7.0 mg, 0.02 mmol, 10.0 mmol%),  $\text{Cu}(\text{OAc})_2 \cdot \text{H}_2\text{O}$  (79.9 mg, 0.4 mmol, 2.0 equiv), and DCM (1.0 ml) were added. The resulting mixture was stirred at 100 °C for 24 h. After that, the resulting mixture was purified by silica gel chromatography using a mixture of petroleum ether/ethyl acetate as an eluent to get **4a-4p**. Fine-tuned temperature and reaction time of the condition above to get **5a-5o**.

#### (2) General procedure B

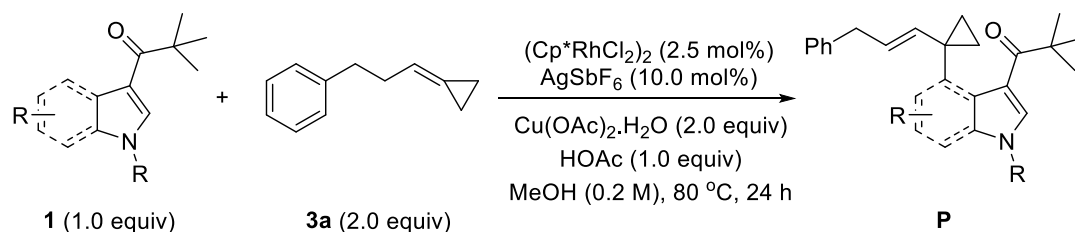

To a Schlenk tube, 2,2-dimethyl-1-(1-*R*-1*H*-indole-3-yl)propan-1-one **1** (0.1 mmol, 1.0 equiv), 3-(cyclopropylidene)propylbenzene **3** (31.6 mg, 0.2 mmol, 2.0 equiv),  $(\text{Cp}^*\text{RhCl}_2)_2$  (1.6 mg, 0.0025 mmol, 2.5 mmol%),  $\text{AgSbF}_6$  (3.5 mg, 0.01 mmol, 10.0 mmol%),  $\text{Cu}(\text{OAc})_2 \cdot \text{H}_2\text{O}$  (79.9 mg, 0.4 mmol, 2.0 equiv),  $\text{HOAc}$  (6.0 mg, 0.1 mmol, 1.0 equiv), and MeOH (1.0 ml) were added. The resulting mixture was stirred at 80 °C for 24 h. After that, the resulting mixture was purified by silica gel chromatography using a mixture of petroleum ether/ethyl acetate as an eluent to get **6a-6j**.

## 4. Product characterization

### (Z)-3-(2-(1-methyl-3-pivaloyl-1H-indol-4-yl)buta-1,3-dien-1-yl)benzonitrile (**4a**)

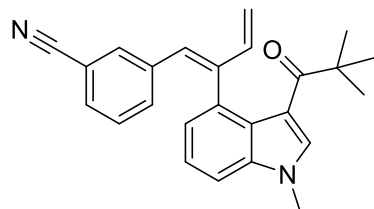

The reaction was performed according to general procedure A with 2,2-dimethyl-1-(1-methyl-1H-indol-3-yl)propan-1-one **1a** (0.2 mmol) and 3-(cyclopropylidenemethyl)benzonitrile **2a** (0.4 mmol) for 24 h. After purification by silica gel chromatography (petroleum ether/ethyl acetate = 8:1,  $R_f$  = 0.22), the desired product **4a** was obtained as a yellow solid (59.7 mg, 81 % yield, Z/E = 16.6:1).  $^1\text{H}$  NMR (400 MHz,  $\text{CDCl}_3$ )  $\delta$  7.57 (s, 1H), 7.34 (d,  $J$  = 8.1 Hz, 1H), 7.27 (d,  $J$  = 7.3 Hz, 1H), 7.25 – 7.19 (m, 1H), 7.14 (d,  $J$  = 7.7 Hz, 1H), 7.09 (s, 1H), 7.06 (d,  $J$  = 7.8 Hz, 1H), 6.88 (d,  $J$  = 7.2 Hz, 1H), 6.71 (dd,  $J$  = 17.2, 10.4 Hz, 1H), 6.58 (s, 1H), 5.10 (d,  $J$  = 10.5 Hz, 1H), 4.64 (d,  $J$  = 17.2 Hz, 1H), 3.87 (s, 3H), 1.20 (s, 9H).  $^{13}\text{C}$  NMR (101 MHz,  $\text{CDCl}_3$ )  $\delta$  202.33, 144.48, 141.09, 138.84, 137.46, 133.75, 132.68, 131.99, 130.81, 129.47, 128.51, 127.28, 125.61, 123.97, 123.49, 119.12, 116.76, 115.76, 111.72, 109.28, 43.83, 33.55, 28.79. ESI-MS: Calcd. for  $\text{C}_{25}\text{H}_{25}\text{N}_2\text{O}^+$   $[\text{M}+\text{H}]^+$  : 369.1967, found: 369.1967.

### (Z)-3-(2-(5-fluoro-1-methyl-3-pivaloyl-1H-indol-4-yl)buta-1,3-dien-1-yl)benzonitrile (**4b**)

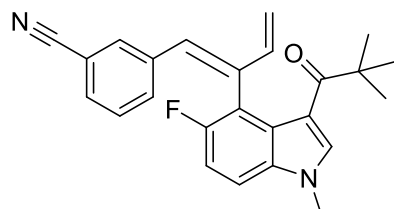

The reaction was performed according to general procedure A with 1-(5-fluoro-1-methyl-1H-indol-3-yl)-2,2-dimethylpropan-1-one **1b** (0.1 mmol) and 3-(cyclopropylidenemethyl)benzonitrile **2a** (0.2 mmol) for 24 h. After purification by silica gel chromatography (petroleum ether/ethyl acetate = 4:1,  $R_f$  = 0.18), the desired product **4b** was obtained as a white solid (34.8 mg, 90 % yield, Z/E = 10:1).  $^1\text{H}$  NMR (400 MHz,  $\text{CDCl}_3$ )  $\delta$  7.53 (s, 1H), 7.24 (dd,  $J$  = 9.1, 4.3 Hz, 1H), 7.21 (d,  $J$  = 8.5 Hz, 1H), 7.16 (d,  $J$  = 7.9 Hz, 1H), 7.10 (d,  $J$  = 5.8 Hz, 1H), 7.06 (d,  $J$  = 7.7 Hz, 1H), 7.00 (t,  $J$  = 9.2 Hz, 1H), 6.73 – 6.59 (m, 1H), 5.05 (d,  $J$  = 10.5 Hz, 1H), 4.57 (d,  $J$  = 17.2 Hz, 1H), 3.81 (s, 3H), 1.13 (s, 9H).  $^{13}\text{C}$  NMR (101 MHz,  $\text{CDCl}_3$ )  $\delta$  202.1, 155.2 (d,  $J$  = 236.7 Hz), 139.9, 138.80, 136.9, 133.8, 133.3, 133.0, 132.1, 130.0, 129.6, 128.8, 126.4 (d,  $J$  = 5.2 Hz), 119.1, 116.5 (d,  $J$  = 19.9 Hz), 116.2, 112.2, 111.9 (d,  $J$  = 6.2 Hz), 110.5 (d,  $J$  = 10.2 Hz), 43.9, 33.8, 28.8.  $^{19}\text{F}$  NMR (376 MHz,  $\text{CDCl}_3$ )  $\delta$  -122.5. ESI-MS: Calcd. for  $\text{C}_{25}\text{H}_{24}\text{FN}_2\text{O}^+$   $[\text{M}+\text{H}]^+$  : 387.1873, found: 387.1876.

**(Z)-3-(2-(5-methoxy-1-methyl-3-pivaloyl-1H-indol-4-yl)buta-1,3-dien-1-yl)benzonitrile (4c)**

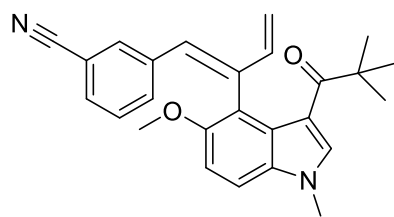

The reaction was performed according to general procedure A with 1-(5-methoxy-1-methyl-1H-indol-3-yl)-2,2-dimethylpropan-1-one **1c** (0.1 mmol) and 3-(cyclopropylidenemethyl)benzonitrile **2a** (0.2 mmol) for 24 h.

After purification by silica gel chromatography (petroleum ether/ethyl acetate = 4:1,  $R_f$  = 0.17), the desired product **4c** was obtained as a yellow oil (44.4 mg, 79 % yield, Z/E = 7.7:1).  $^1\text{H}$  NMR (400 MHz,  $\text{CDCl}_3$ )  $\delta$  7.49 (s, 1H), 7.33 (d,  $J$  = 8.9 Hz, 1H), 7.23 (d,  $J$  = 7.6 Hz, 1H), 7.18 (d,  $J$  = 8.0 Hz, 1H), 7.10 (dd,  $J$  = 8.9, 6.4 Hz, 2H), 7.05 (d,  $J$  = 8.9 Hz, 1H), 6.74 (dd,  $J$  = 17.1, 10.4 Hz, 1H), 6.67 (s, 1H), 5.09 (d,  $J$  = 10.3 Hz, 1H), 4.65 (d,  $J$  = 17.1 Hz, 1H), 3.84 (s, 3H), 3.62 (s, 3H), 1.15 (s, 9H).  $^{13}\text{C}$  NMR (101 MHz,  $\text{CDCl}_3$ )  $\delta$  202.6, 152.0, 140.5, 139.6, 139.3, 133.3, 133.1, 132.5, 132.0, 129.6, 128.8, 128.6, 126.4, 119.3, 118.3, 115.8, 115.7, 111.8, 110.5, 110.0, 57.7, 43.9, 33.4, 28.8. ESI-MS: Calcd. for  $\text{C}_{26}\text{H}_{27}\text{N}_2\text{O}_2^+$   $[\text{M}+\text{H}]^+$  : 399.2073, found: 399.2078.

**(Z)-3-(2-(6-fluoro-1-methyl-3-pivaloyl-1H-indol-4-yl)buta-1,3-dien-1-yl)benzonitrile (4d)**

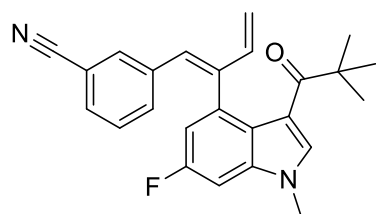

The reaction was performed according to general procedure A with 1-(6-fluoro-1-methyl-1H-indol-3-yl)-2,2-dimethylpropan-1-one **1d** (0.1 mmol) and 3-(cyclopropylidenemethyl)benzonitrile **2a** (0.2 mmol) for 24 h.

After purification by silica gel chromatography (petroleum ether/ethyl acetate = 4:1,  $R_f$  = 0.21), the desired product **4d** was obtained as a white solid (39.7 mg, 81 % yield, Z/E = 10:1).  $^1\text{H}$  NMR (400 MHz,  $\text{CDCl}_3$ )  $\delta$  7.58 (s, 1H), 7.27 (d,  $J$  = 7.1 Hz, 1H), 7.16 (d,  $J$  = 12.8 Hz, 2H), 7.11 (d,  $J$  = 7.7 Hz, 1H), 7.03 (d,  $J$  = 8.2 Hz, 1H), 6.75 – 6.62 (m, 2H), 6.59 (s, 1H), 5.12 (d,  $J$  = 10.4 Hz, 1H), 4.63 (d,  $J$  = 17.2 Hz, 1H), 3.83 (s, 3H), 1.20 (s, 9H).  $^{13}\text{C}$  NMR (101 MHz,  $\text{CDCl}_3$ )  $\delta$  202.2, 160.1 (d,  $J$  = 241.2 Hz), 143.2, 140.5, 138.4, 137.7 (d,  $J$  = 12.1 Hz), 133.2 (d,  $J$  = 103.0 Hz), 132.4, 132.4, 132.4, 129.8, 128.7, 127.7, 122.2, 119.0, 116.9, 116.0, 112.3 (d,  $J$  = 24.1 Hz), 111.9, 95.8 (d,  $J$  = 25.7 Hz), 43.9, 33.6, 28.7.  $^{19}\text{F}$  NMR (376 MHz,  $\text{CDCl}_3$ )  $\delta$  -118.66. ESI-MS: Calcd. for  $\text{C}_{25}\text{H}_{24}\text{FN}_2\text{O}^+$   $[\text{M}+\text{H}]^+$  : 387.1873, found: 387.1878.

**(Z)-3-(2-(6-chloro-1-methyl-3-pivaloyl-1H-indol-4-yl)buta-1,3-dien-1-yl)benzotrile (4e)**

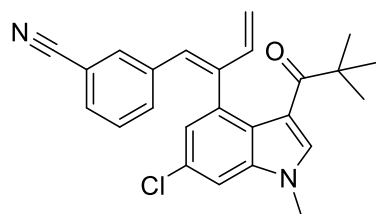

The reaction was performed according to general procedure A with 1-(6-chloro-1-methyl-1H-indol-3-yl)-2,2-dimethylpropan-1-one **1e** (0.1 mmol) and 3-(cyclopropylidenemethyl)benzotrile **2a** (0.2 mmol) for 24 h.

After purification by silica gel chromatography (petroleum ether/ethyl acetate = 4:1,  $R_f$  = 0.22), the desired product **4e** was obtained as a white solid (32.6 mg, 81 % yield, Z/E = 4:1).  $^1\text{H}$  NMR (400 MHz,  $\text{CDCl}_3$ )  $\delta$  7.55 (s, 1H), 7.34 (d,  $J$  = 6.9 Hz, 1H), 7.30 – 7.24 (m, 1H), 7.15 (d,  $J$  = 9.1 Hz, 2H), 7.11 (d,  $J$  = 7.6 Hz, 1H), 6.86 (s, 1H), 6.67 (dd,  $J$  = 17.2, 10.5 Hz, 1H), 6.59 (s, 1H), 5.11 (d,  $J$  = 10.4 Hz, 1H), 4.60 (d,  $J$  = 17.2 Hz, 1H), 3.85 (s, 3H), 1.19 (s, 9H).  $^{13}\text{C}$  NMR (101 MHz,  $\text{CDCl}_3$ )  $\delta$  202.1, 143.0, 140.7, 138.4, 137.9, 133.7, 132.8, 132.5, 132.3, 129.9, 129.3, 128.7, 127.9, 124.5, 124.2, 119.1, 117.0, 116.0, 112.0, 109.4, 43.9, 33.7, 28.7. ESI-MS: Calcd. for  $\text{C}_{25}\text{H}_{24}\text{ClN}_2\text{O}^+$   $[\text{M}+\text{H}]^+$  : 403.1577, found: 403.1577.

**(Z)-3-(2-(6-bromo-1-methyl-3-pivaloyl-1H-indol-4-yl)buta-1,3-dien-1-yl)benzotrile (4f)**

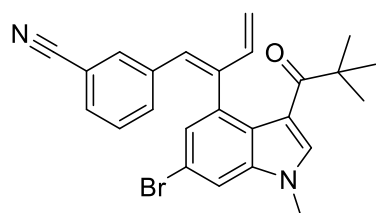

The reaction was performed according to general procedure A with 1-(6-bromo-1-methyl-1H-indol-3-yl)-2,2-dimethylpropan-1-one **1f** (0.1 mmol) and 3-(cyclopropylidenemethyl)benzotrile **2a** (0.2 mmol) for 24 h.

After purification by silica gel chromatography (petroleum ether/ethyl acetate = 4:1,  $R_f$  = 0.22), the desired product **4f** was obtained as a white solid (28.5 mg, 64 % yield, Z/E = 4:1).  $^1\text{H}$  NMR (400 MHz,  $\text{CDCl}_3$ )  $\delta$  7.54 (s, 1H), 7.53 – 7.50 (m, 1H), 7.49 (s, 1H), 7.28 (d,  $J$  = 6.1 Hz, 1H), 7.13 (s, 2H), 7.00 (d,  $J$  = 1.2 Hz, 1H), 6.67 (dd,  $J$  = 17.2, 10.5 Hz, 1H), 6.59 (s, 1H), 5.11 (d,  $J$  = 10.5 Hz, 1H), 4.60 (d,  $J$  = 17.2 Hz, 1H), 3.85 (s, 3H), 1.18 (s, 9H).  $^{13}\text{C}$  NMR (101 MHz,  $\text{CDCl}_3$ )  $\delta$  202.1, 142.9, 140.7, 138.4, 138.2, 133.7, 132.8, 132.6, 132.4, 129.9, 128.7, 128.0, 126.7, 124.8, 119.1, 117.0, 116.8, 116.1, 112.4, 112.0, 44.00, 33.7, 28.7. ESI-MS: Calcd. for  $\text{C}_{25}\text{H}_{24}\text{BrN}_2\text{O}^+$   $[\text{M}+\text{H}]^+$  : 447.1072, found: 447.1071.



**(Z)-3-(2-(1,6-dimethyl-3-pivaloyl-1H-indol-4-yl)buta-1,3-dien-1-yl)benzotrile (4g)**

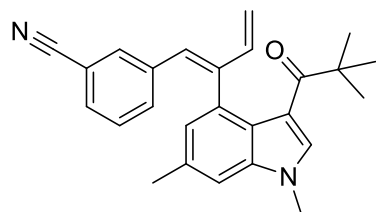

The reaction was performed according to general procedure A with 1-(1,6-dimethyl-1H-indol-3-yl)-2,2-dimethylpropan-1-one **1g** (0.1 mmol) and 3-(cyclopropylidenemethyl)benzotrile **2a** (0.2 mmol) for 24 h. After purification by silica gel chromatography (petroleum ether/ethyl acetate = 8:1,  $R_f$  = 0.15), the desired product **4g** was obtained as a yellow solid (32.6 mg, 85 % yield, Z/E = 7.1:1).  $^1\text{H}$  NMR (400 MHz,  $\text{CDCl}_3$ )  $\delta$  7.49 (s, 1H), 7.23 (d,  $J$  = 7.3 Hz, 1H), 7.13 (d,  $J$  = 5.9 Hz, 1H), 7.09 (d,  $J$  = 7.6 Hz, 1H), 7.07 (s, 1H), 6.72 (q,  $J$  = 10.3 Hz, 1H), 6.55 (s, 1H), 5.12 (d,  $J$  = 10.5 Hz, 1H), 4.67 (d,  $J$  = 17.1 Hz, 1H), 3.83 (s, 3H), 2.42 (s, 3H), 1.17 (s, 9H).  $^{13}\text{C}$  NMR (101 MHz,  $\text{CDCl}_3$ )  $\delta$  202.3, 144.5, 141.3, 138.9, 138.0, 133.8, 133.5, 132.7, 131.7, 130.5, 129.5, 128.5, 127.3, 125.5, 123.5, 119.2, 116.8, 115.6, 111.8, 109.3, 43.8, 33.5, 28.8, 21.7. ESI-MS: Calcd. for  $\text{C}_{26}\text{H}_{27}\text{N}_2\text{O}^+$   $[\text{M}+\text{H}]^+$  : 383.2123, found: 383.2125.

**(Z)-3-(2-(6-methoxy-1-methyl-3-pivaloyl-1H-indol-4-yl)buta-1,3-dien-1-yl)benzotrile (4h)**

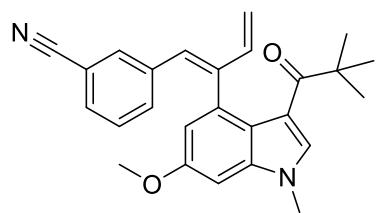

The reaction was performed according to general procedure A with 1-(6-methoxy-1-methyl-1H-indol-3-yl)-2,2-dimethylpropan-1-one **1h** (0.1 mmol) and 3-(cyclopropylidenemethyl)benzotrile **2a** (0.2 mmol) for 24 h. After purification by silica gel chromatography (petroleum ether/ethyl acetate = 4:1,  $R_f$  = 0.15), the desired product **4h** was obtained as a yellow solid (37.9 mg, 95 % yield, Z/E = 4:1).  $^1\text{H}$  NMR (400 MHz,  $\text{CDCl}_3$ )  $\delta$  7.46 (s, 1H), 7.24 (d,  $J$  = 8.2 Hz, 1H), 7.16 (d,  $J$  = 7.7 Hz, 1H), 7.10 (t,  $J$  = 7.6 Hz, 2H), 6.77 (s, 1H), 6.69 (dd,  $J$  = 17.1, 10.4 Hz, 1H), 6.55 (s, 2H), 5.12 (d,  $J$  = 10.4 Hz, 1H), 4.69 (d,  $J$  = 17.1 Hz, 1H), 3.82 (s, 6H), 1.17 (s, 9H).  $^{13}\text{C}$  NMR (101 MHz,  $\text{CDCl}_3$ )  $\delta$  202.3, 157.2, 144.1, 141.0, 138.7, 138.5, 133.8, 132.7, 131.8, 131.3, 129.6, 128.6, 127.4, 119.9, 119.2, 116.9, 115.8, 113.3, 111.8, 92.7, 55.8, 43.9, 33.6, 28.8. ESI-MS: Calcd. for  $\text{C}_{26}\text{H}_{27}\text{N}_2\text{O}_2^+$   $[\text{M}+\text{H}]^+$  : 399.2073, found: 399.2069.

**(Z)-3-(2-(6-(4-methoxyphenyl)-1-methyl-3-pivaloyl-1H-indol-4-yl)buta-1,3-dien-1-yl)benzotrile (4i)**

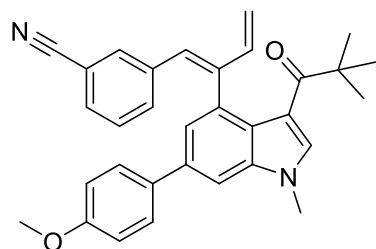

The reaction was performed according to general procedure A with 1-(6-(4-methoxyphenyl)-1-methyl-1H-indol-3-yl)-2,2-dimethylpropan-1-one **1i** (0.1 mmol) and 3-(cyclopropylidenemethyl)benzotrile **2a** (0.2 mmol) for 24 h. After purification by silica gel chromatography (petroleum ether/ethyl acetate = 4:1,  $R_f$  = 0.13), the desired product **4i** was obtained as a yellow solid (34.5 mg, 73 % yield, Z/E = 7.1:1).  $^1\text{H NMR}$  (400 MHz,  $\text{CDCl}_3$ )  $\delta$  7.58 (s, 1H), 7.49 (d,  $J$  = 8.7 Hz, 3H), 7.23 (d,  $J$  = 7.5 Hz, 1H), 7.17 (d,  $J$  = 9.0 Hz, 2H), 7.12 (s, 1H), 7.08 (t,  $J$  = 7.7 Hz, 1H), 6.95 (d,  $J$  = 8.6 Hz, 2H), 6.74 (dd,  $J$  = 17.2, 10.4 Hz, 1H), 6.61 (s, 1H), 5.14 (d,  $J$  = 10.5 Hz, 1H), 4.73 (d,  $J$  = 17.1 Hz, 1H), 3.91 (s, 3H), 3.83 (s, 3H), 1.21 (s, 9H).  $^{13}\text{C NMR}$  (101 MHz,  $\text{CDCl}_3$ )  $\delta$  202.3, 159.1, 144.5, 141.2, 138.8, 138.2, 136.6, 133.8, 133.8, 132.8, 132.4, 131.1, 129.6, 128.6, 128.4, 127.5, 124.6, 123.4, 119.2, 116.9, 115.8, 114.3, 111.8, 107.1, 55.5, 43.9, 33.6, 28.8. ESI-MS: Calcd. for  $\text{C}_{32}\text{H}_{31}\text{N}_2\text{O}_2^+$   $[\text{M}+\text{H}]^+$ : 475.2386, found: 475.2379.

**(Z)-3-(2-(6-(4-fluoro-3-methylphenyl)-1-methyl-3-pivaloyl-1H-indol-4-yl)buta-1,3-dien-1-yl)benzotrile (4j)**

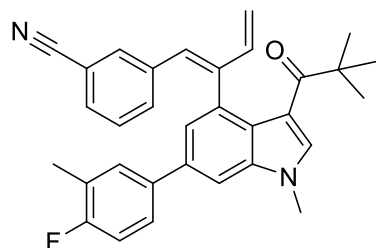

The reaction was performed according to general procedure A with 1-(6-(4-fluoro-3-methylphenyl)-1-methyl-1H-indol-3-yl)-2,2-dimethylpropan-1-one **1j** (0.1 mmol) and 3-(cyclopropylidenemethyl)benzotrile **2a** (0.2 mmol) for 24 h. After purification by silica gel chromatography (petroleum ether/ethyl acetate = 4:1,  $R_f$  = 0.24), the desired product **4j** was obtained as a yellow solid (30.2 mg, 63 % yield, Z/E = 5.6:1).  $^1\text{H NMR}$  (400 MHz,  $\text{CDCl}_3$ )  $\delta$  7.59 (s, 1H), 7.46 (d,  $J$  = 4.1 Hz, 1H), 7.34 (d,  $J$  = 7.4 Hz, 1H), 7.24 (d,  $J$  = 7.5 Hz, 1H), 7.18 (d,  $J$  = 7.9 Hz, 1H), 7.13 (s, 1H), 7.12 – 7.07 (m, 2H), 7.03 (t,  $J$  = 8.9 Hz, 1H), 6.75 (dd,  $J$  = 17.2, 10.3 Hz, 1H), 6.62 (s, 1H), 5.14 (d,  $J$  = 10.5 Hz, 1H), 4.72 (d,  $J$  = 17.2 Hz, 1H), 3.92 (s, 3H), 2.32 (s, 3H), 1.21 (s, 9H).  $^{13}\text{C NMR}$  (101 MHz,  $\text{CDCl}_3$ )  $\delta$  202.3, 161.0 (d,  $J$  = 245.1 Hz), 144.3, 141.2, 138.8, 138.1, 137.1 (d,  $J$  = 3.5 Hz), 136.2, 133.8, 132.8, 132.6, 131.2, 130.4 (d,  $J$  = 5.1 Hz), 129.6, 128.6, 127.6, 126.2 (d,  $J$  = 8.0 Hz), 125.1 (d,  $J$  = 17.4 Hz), 124.9, 123.6,

119.1, 117.0, 115.3 (d,  $J = 22.4$  Hz). 115.2, 111.84 107.4, 43.9, 33.7, 28.8, 14.8 (d,  $J = 3.4$  Hz).  $^{19}\text{F}$  NMR (376 MHz,  $\text{CDCl}_3$ )  $\delta$  -120.22. ESI-MS: Calcd. for  $\text{C}_{32}\text{H}_{30}\text{FN}_2\text{O}^+$   $[\text{M}+\text{H}]^+$  : 477.2342, found: 477.2341.

**(Z)-3-(2-(6-(dibenzo[b,d]thiophen-2-yl)-1-methyl-3-pivaloyl-1H-indol-4-yl)buta-1,3-dien-1-yl)benzotrile (4k)**

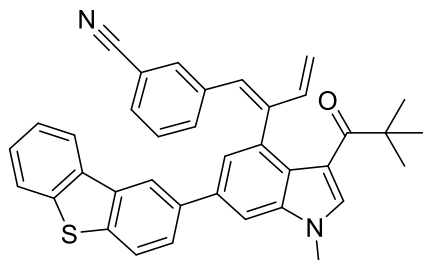

The reaction was performed according to general procedure A with 1-(6-(dibenzo[b,d]thiophen-2-yl)-1-methyl-1H-indol-3-yl)-2,2-dimethylpropan-1-one **1k** (0.1 mmol) and 3-(cyclopropylidene)methyl)benzotrile **2a** (0.2 mmol) for 24 h. After purification by silica gel

chromatography (petroleum ether/ethyl acetate = 4:1,  $R_f = 0.16$ ), the desired product **4k** was obtained as a yellow oil (34.5 mg, 63 % yield, Z/E = 6.3:1).  $^1\text{H}$  NMR (400 MHz,  $\text{CDCl}_3$ )  $\delta$  8.26 (s, 1H), 8.23 – 8.17 (m, 1H), 7.86 (dd,  $J = 9.5, 6.1$  Hz, 2H), 7.68 – 7.60 (m, 3H), 7.51 – 7.42 (m, 2H), 7.26 – 7.19 (m, 2H), 7.11 (t,  $J = 7.7$  Hz, 1H), 6.78 (dd,  $J = 17.2, 10.5$  Hz, 1H), 6.66 (s, 1H), 5.17 (d,  $J = 10.5$  Hz, 1H), 4.78 (d,  $J = 17.2$  Hz, 1H), 3.97 (s, 3H), 1.24 (s, 9H).  $^{13}\text{C}$  NMR (101 MHz,  $\text{CDCl}_3$ )  $\delta$  202.3, 144.4, 141.1, 140.0, 138.9, 138.4, 138.2, 138.0, 136.9, 136.2, 135.5, 133.8, 132.8, 132.6, 131.3, 129.7, 128.6, 127.6, 127.0, 126.4, 125.1, 124.5, 124.0, 123.1, 123.0, 121.8, 120.2, 119.1, 117.0, 115.9, 111.9, 107.8, 43.9, 33.7, 28.8. ESI-MS: Calcd. for  $\text{C}_{37}\text{H}_{31}\text{N}_2\text{OS}^+$   $[\text{M}+\text{H}]^+$  : 551.2157, found: 551.2158

**(Z)-3-(2-(6-chloro-5-fluoro-1-methyl-3-pivaloyl-1H-indol-4-yl)buta-1,3-dien-1-yl)benzotrile (4l)**

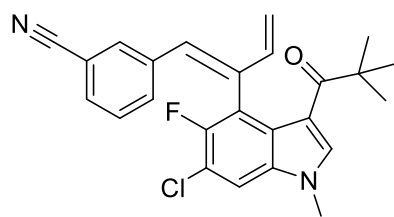

The reaction was performed according to general procedure A with 1-(6-chloro-5-fluoro-1-methyl-1H-indol-3-yl)-2,2-dimethylpropan-1-one **1l** (0.1 mmol) and 3-(cyclopropylidene)methyl)benzotrile **2a** (0.2 mmol) for 24 h.

After purification by silica gel chromatography (petroleum ether/ethyl acetate = 4:1,  $R_f = 0.13$ ), the desired product **4l** was obtained as a white solid (26.5 mg, 63 % yield, Z/E = 10:1).  $^1\text{H}$  NMR (400 MHz,  $\text{CDCl}_3$ )  $\delta$  7.59 (s, 1H), 7.41 (d,  $J = 5.8$  Hz, 1H), 7.30 (d,  $J = 7.4$  Hz, 1H), 7.22 (d,  $J = 8.0$  Hz, 2H), 7.15 (t,  $J = 7.7$  Hz, 1H), 6.76 (s, 1H), 6.68 (dd,  $J = 17.2, 10.5$  Hz, 1H), 5.10 (d,  $J = 10.4$  Hz, 1H), 4.56 (d,  $J = 17.2$  Hz, 1H), 3.85 (s, 3H), 1.19 (s, 9H).  $^{13}\text{C}$  NMR (101 MHz,  $\text{CDCl}_3$ )  $\delta$  201.9, 150.4 (d,  $J = 239.4$  Hz), 139.6, 138.5, 136.0, 133.2 (d,  $J = 3.1$  Hz), 132.1, 130.3, 130.1, 128.9, 125.1 (d,  $J = 3.9$  Hz), 119.0,

118.0 (d,  $J = 20.1$  Hz), 117.7 (d,  $J = 23.1$  Hz), 116.4 (d,  $J = 4.4$  Hz). 116.3, 112.1, 111.0, 44.0, 33.9, 28.7.

$^{19}\text{F}$  NMR (376 MHz,  $\text{CDCl}_3$ )  $\delta$  -123.64. ESI-MS: Calcd. for  $\text{C}_{25}\text{H}_{23}\text{ClFN}_2\text{O}^+$   $[\text{M}+\text{H}]^+$  : 421.1483, found: 421.1484.

**(Z)-3-(2-(1-methyl-3-pivaloyl-1,6,7,8-tetrahydrocyclopenta[g]indol-4-yl)buta-1,3-dien-1-yl)benzotrile (4m)**

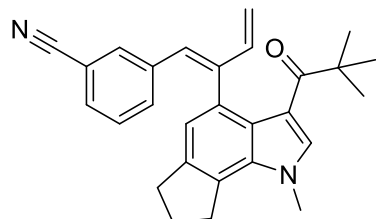

The reaction was performed according to general procedure A with 2,2-dimethyl-1-(1-methyl-1,6,7,8-tetrahydrocyclopenta[g]indol-3-yl)propan-1-one **1m** (0.1 mmol) and 3-(cyclopropylidene)methyl)benzotrile **2a** (0.2 mmol) for

24 h. After purification by silica gel chromatography (petroleum ether/ethyl acetate = 8:1,  $R_f = 0.15$ ), the desired product **4m** was obtained as a yellow solid (31.3 mg, 78 % yield, Z/E = 7.7:1).  $^1\text{H}$  NMR (400 MHz,  $\text{CDCl}_3$ )  $\delta$  7.40 (s, 1H), 7.24 (d,  $J = 7.5$  Hz, 1H), 7.18 (d,  $J = 8.0$  Hz, 1H), 7.13 – 7.07 (m, 2H), 6.73 (s, 1H), 6.66 (dd,  $J = 17.2, 10.4$  Hz, 1H), 6.53 (s, 1H), 5.09 (d,  $J = 10.6$  Hz, 1H), 4.66 (d,  $J = 17.0$  Hz, 1H), 4.03 (s, 3H), 3.54 – 3.32 (m, 2H), 2.93 (t,  $J = 7.5$  Hz, 2H), 2.21 (ddd,  $J = 11.9, 7.3, 4.1$  Hz, 2H), 1.18 (s, 9H).  $^{13}\text{C}$  NMR (101 MHz,  $\text{CDCl}_3$ )  $\delta$  202.6, 145.0, 141.3, 140.9, 139.0, 134.9, 133.9, 132.83, 131., 129.4, 128.9, 128.5, 127.1, 125.3, 124.8, 120.8, 119.30, 116., 116.10, 111.1, 43., 36.0, 32.6, 31.6, 28.9, 25.4. ESI-MS: Calcd. for  $\text{C}_{28}\text{H}_{28}\text{N}_2\text{O}^+$   $[\text{M}+\text{H}]^+$  : 409.2280, found: 409.2284.

**(Z)-3-(2-(7-chloro-1-methyl-3-pivaloyl-1H-indol-4-yl)buta-1,3-dien-1-yl)benzotrile (4n)**

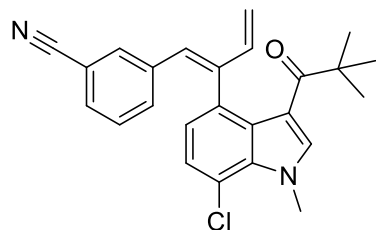

The reaction was performed according to general procedure A with 1-(7-chloro-1-methyl-1H-indol-3-yl)-2,2-dimethylpropan-1-one **1n** (0.1 mmol) and 3-(cyclopropylidene)methyl)benzotrile **2a** (0.2 mmol) for 24 h.

After purification by silica gel chromatography (petroleum ether/ethyl acetate = 8:1,  $R_f = 0.20$ ), the desired product **4n** was obtained as a yellow solid (34.8 mg, 86 % yield, Z/E = 4.3:1).  $^1\text{H}$  NMR (400 MHz,  $\text{CDCl}_3$ )  $^1\text{H}$  NMR (400 MHz,  $\text{CDCl}_3$ )  $\delta$  7.48 (s, 1H), 7.32 – 7.26 (m, 1H), 7.24 (s, 1H), 7.18 (dd,  $J = 7.8, 3.5$  Hz, 1H), 7.13 (t,  $J = 7.7$  Hz, 1H), 6.71 (d,  $J = 7.9$  Hz, 1H), 6.67 – 6.56 (m, 1H), 5.08 (d,  $J = 10.5$  Hz, 1H), 4.57 (d,  $J = 17.2$  Hz, 1H), 4.25 (s, 3H), 1.22 (s, 9H).  $^{13}\text{C}$  NMR (101 MHz,  $\text{CDCl}_3$ )  $\delta$  202.4, 143.5, 140.7, 138.7, 134.2, 133.8, 132.9, 129.8, 129.8, 128.7, 127.7, 125.2, 124.8, 116.9, 44.0, 38.0, 28.8. ESI-MS: Calcd. for  $\text{C}_{25}\text{H}_{24}\text{ClN}_2\text{O}^+$   $[\text{M}+\text{H}]^+$  : 403.1577, found: 403.1579.

**(Z)-3-(2-(1-benzyl-3-pivaloyl-1H-indol-4-yl)buta-1,3-dien-1-yl)benzonitrile (4o)**

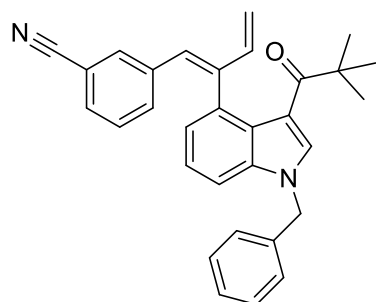

The reaction was performed according to general procedure A with 1-(1-benzyl-1*H*-indol-3-yl)-2,2-dimethylpropan-1-one **1o** (0.1 mmol) and 3-(cyclopropylidenemethyl)benzonitrile **2a** (0.2 mmol) for 24 h. After purification by silica gel chromatography (petroleum ether/ethyl acetate = 8:1,  $R_f$  = 0.24), the desired product **4o** was obtained as a yellow oil (28.4 mg, 64 % yield,

Z/E = 6.3:1).  $^1\text{H}$  NMR (400 MHz,  $\text{CDCl}_3$ )  $\delta$  7.52 (s, 1H), 7.30 (t,  $J$  = 7.3 Hz, 2H), 7.24 (d,  $J$  = 4.5 Hz, 1H), 7.20 (d,  $J$  = 7.3 Hz, 1H), 7.19 – 7.14 (m, 2H), 7.03 (dd,  $J$  = 12.3, 6.9 Hz, 4H), 6.95 (s, 1H), 6.83 (d,  $J$  = 7.1 Hz, 1H), 6.68 (dd,  $J$  = 17.2, 10.4 Hz, 1H), 6.50 (s, 1H), 5.33 (s, 2H), 5.10 (d,  $J$  = 10.5 Hz, 1H), 4.68 (d,  $J$  = 17.1 Hz, 1H), 1.07 (s, 9H).  $^{13}\text{C}$  NMR (101 MHz,  $\text{CDCl}_3$ )  $\delta$  202.6, 144.3, 141.3, 138.8, 137.1, 136.2, 133.7, 132.6, 131.5, 130.9, 129.6, 129.2, 128.6, 128.2, 127.5, 126.7, 125.6, 124.2, 123.7, 119.1, 117.1, 116.2, 111.9, 109.9, 50.7, 43.9, 28.8. ESI-MS: Calcd. for  $\text{C}_{31}\text{H}_{29}\text{N}_2\text{O}^+$   $[\text{M}+\text{H}]^+$  : 445.2280, found: 445.2279.

**(Z)-3-(2-(1-isopropyl-3-pivaloyl-1H-indol-4-yl)buta-1,3-dien-1-yl)benzonitrile (4p)**

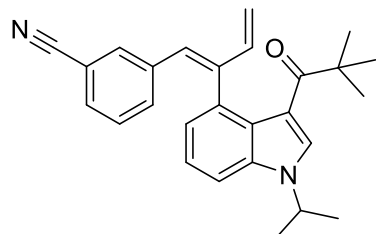

The reaction was performed according to general procedure A with 1-(1-isopropyl-1*H*-indol-3-yl)-2,2-dimethylpropan-1-one **1p** (0.1 mmol) and 3-(cyclopropylidenemethyl)benzonitrile **2a** (0.2 mmol) for 24 h. After purification by silica gel

chromatography (petroleum ether/ethyl acetate = 8:1,  $R_f$  = 0.19), the desired product **4p** was obtained as a white solid (24.7 mg, 62 % yield, Z/E = 8.3:1).  $^1\text{H}$  NMR (400 MHz,  $\text{CDCl}_3$ )  $\delta$  7.67 (s, 1H), 7.41 (d,  $J$  = 8.3 Hz, 1H), 7.27 (d,  $J$  = 7.8 Hz, 1H), 7.22 (d,  $J$  = 7.4 Hz, 1H), 7.14 (d,  $J$  = 7.8 Hz, 1H), 7.08 (t,  $J$  = 7.7 Hz, 1H), 6.97 (s, 1H), 6.89 (d,  $J$  = 7.2 Hz, 1H), 6.73 (dd,  $J$  = 17.2, 10.4 Hz, 1H), 6.55 (s, 1H), 5.14 (d,  $J$  = 10.4 Hz, 1H), 4.82 – 4.69 (m, 2H), 1.60 (dd,  $J$  = 6.5, 3.7 Hz, 6H), 1.17 (s, 9H).  $^{13}\text{C}$  NMR (101 MHz,  $\text{CDCl}_3$ )  $\delta$  202.7, 144.5, 141.2, 138.8, 136.5, 133.8, 132.6, 130.9, 129.5, 128.5, 127.3, 127.0, 125.6, 124.0, 123.3, 119.1, 117.0, 116.0, 111.8, 109.5, 47.7, 43.8, 28.9, 22.8, 22.8. ESI-MS: Calcd. for  $\text{C}_{27}\text{H}_{29}\text{N}_2\text{O}^+$   $[\text{M}+\text{H}]^+$  : 397.2280, found: 397.2285.

**(Z)-1-(4-(1-(4-(tert-butyl)phenyl)buta-1,3-dien-2-yl)-1-methyl-1H-indol-3-yl)-2,2-dimethylpropan-1-one (5a)**

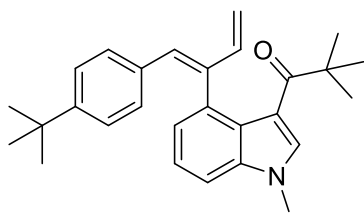

The reaction was performed according to general procedure A with 2,2-dimethyl-1-(1-methyl-1*H*-indol-3-yl)propan-1-one **1a** (0.1 mmol) and 1-(*tert*-butyl)-4-(cyclopropylidenemethyl)benzene **2** (0.2 mmol) at 80°C for 20 h.

After purification by silica gel chromatography (petroleum ether/ethyl acetate =16:1,  $R_f$  = 0.18), the desired product **5a** was obtained as a yellow solid (26.5 mg, 66 % yield, Z/E = 4.3:1).  $^1\text{H}$  NMR (500 MHz,  $\text{CDCl}_3$ )  $\delta$  7.48 (s, 1H), 7.36 – 7.29 (m, 2H), 7.03 (dd,  $J$  = 5.8, 2.5 Hz, 1H), 7.00 (d,  $J$  = 8.5 Hz, 2H), 6.80 (dd,  $J$  = 17.2, 10.5 Hz, 1H), 6.75 (d,  $J$  = 8.5 Hz, 2H), 6.60 (s, 1H), 5.07 (d,  $J$  = 10.8 Hz, 1H), 4.64 (d,  $J$  = 17.1 Hz, 1H), 3.85 (s, 3H), 1.18 (s, 9H), 1.12 (s, 9H).  $^{13}\text{C}$  NMR (126 MHz,  $\text{CDCl}_3$ )  $\delta$  202.6, 149.3, 142.5, 140.5, 137.5, 134.4, 132.2, 131.2, 130.5, 129.2, 125.4, 124.8, 124.1, 123.3, 116.1, 114.6, 108.6, 43.8, 34.4, 33.5, 31.2, 28.7. ESI-MS: Calcd. for  $\text{C}_{28}\text{H}_{34}\text{NO}^+$   $[\text{M}+\text{H}]^+$  : 400.2640, found: 400.2638.

**methyl (Z)-4-(2-(1-methyl-3-pivaloyl-1H-indol-4-yl)buta-1,3-dien-1-yl)benzoate (5b)**

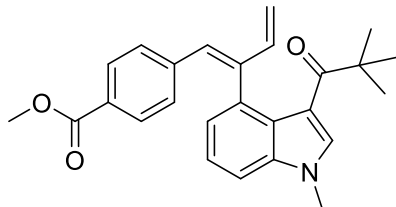

The reaction was performed according to general procedure A with 2,2-dimethyl-1-(1-methyl-1*H*-indol-3-yl)propan-1-one **1a** (0.2 mmol) and methyl 4-(cyclopropylidenemethyl)benzoate **2b** (0.4 mmol) for 24 h.

After purification by silica gel chromatography (petroleum ether/ethyl acetate =8:1,  $R_f$  = 0.18), the desired product **5b** was obtained as a yellow solid (48.1 mg, 60 % yield, Z/E = 6.6:1).  $^1\text{H}$  NMR (400 MHz,  $\text{CDCl}_3$ )  $\delta$  7.63 (d,  $J$  = 8.3 Hz, 2H), 7.52 (s, 1H), 7.31 (dd,  $J$  = 16.5, 7.5 Hz, 2H), 6.94 (d,  $J$  = 6.9 Hz, 1H), 6.87 (d,  $J$  = 8.3 Hz, 2H), 6.79 (dd,  $J$  = 17.2, 10.4 Hz, 1H), 6.64 (s, 1H), 5.15 (d,  $J$  = 10.5 Hz, 1H), 4.72 (d,  $J$  = 17.1 Hz, 1H), 3.85 (s, 3H), 3.80 (s, 3H), 1.15 (s, 9H).  $^{13}\text{C}$  NMR (101 MHz,  $\text{CDCl}_3$ )  $\delta$  202.4, 167.1, 144.2, 142.3, 141.8, 137.5, 131.8, 131.4, 129.2, 129.1, 129.1, 127.4, 125.5, 124.1, 123.4, 116.6, 115.8, 109.0, 51.9, 43.9, 33.5, 28.8. ESI-MS: Calcd. for  $\text{C}_{26}\text{H}_{28}\text{NO}_3^+$   $[\text{M}+\text{H}]^+$  : 402.2069, found: 402.2061.

**(Z)-4-(2-(1-methyl-3-pivaloyl-1H-indol-4-yl)buta-1,3-dien-1-yl)benzonitrile (5c)**

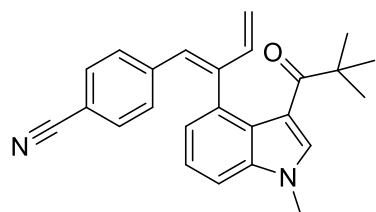

The reaction was performed according to general procedure A with 2,2-dimethyl-1-(1-methyl-1*H*-indol-3-yl)propan-1-one **1a** (0.2 mmol) and 4-(cyclopropylidenemethyl)benzonitrile **2c** (0.4 mmol) for 24 h. After purification by silica gel chromatography (petroleum ether/ethyl acetate =8:1,  $R_f = 0.19$ ), the desired product **5c** was obtained as a yellow solid (37.9 mg, 51 % yield, Z/E = 14.3:1).  $^1\text{H}$  NMR (400 MHz,  $\text{CDCl}_3$ )  $\delta$  7.57 (s, 1H), 7.35 (d,  $J = 8.2$  Hz, 1H), 7.28 (d,  $J = 7.4$  Hz, 1H), 7.25 (s, 1H), 7.23 (s, 1H), 6.94 (d,  $J = 8.3$  Hz, 2H), 6.89 (d,  $J = 7.1$  Hz, 1H), 6.73 (dd,  $J = 17.2, 10.4$  Hz, 1H), 6.61 (s, 1H), 5.14 (d,  $J = 10.5$  Hz, 1H), 4.67 (d,  $J = 17.2$  Hz, 1H), 3.87 (s, 3H), 1.19 (s, 9H).  $^{13}\text{C}$  NMR (101 MHz,  $\text{CDCl}_3$ )  $\delta$  202.5, 145.4, 142.4, 141.3, 137.5, 132.0, 131.5, 131.0, 129.8, 128.1, 125.6, 124.0, 123.5, 119.4, 117.3, 115.8, 109.3, 109.0, 43.9, 33.6, 28.8. ESI-MS: Calcd. for  $\text{C}_{25}\text{H}_{25}\text{N}_2\text{O}^+$   $[\text{M}+\text{H}]^+$  : 369.1967, found: 369.1966

**methyl (Z)-3-(2-(1-methyl-3-pivaloyl-1H-indol-4-yl)buta-1,3-dien-1-yl)benzoate (5d)**

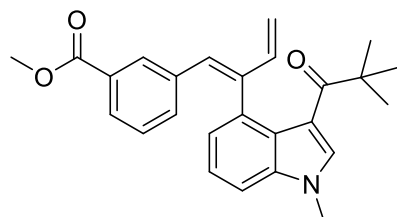

The reaction was performed according to general procedure A with 2,2-dimethyl-1-(1-methyl-1*H*-indol-3-yl)propan-1-one **1a** (0.2 mmol) and methyl 3-(cyclopropylidenemethyl)benzoate **2d** (0.4 mmol) for 23 h. After purification by silica gel chromatography (petroleum ether/ethyl acetate =8:1,  $R_f = 0.19$ ), the desired product **5d** was obtained as a colorless oil (50.9 mg, 63 % yield, Z/E = 8.3:1).  $^1\text{H}$  NMR (400 MHz,  $\text{CDCl}_3$ )  $\delta$  7.62 (d,  $J = 7.3$  Hz, 1H), 7.57 (s, 1H), 7.51 (s, 1H), 7.37 – 7.23 (m, 2H), 7.02 – 6.88 (m, 3H), 6.78 (dd,  $J = 17.2, 10.4$  Hz, 1H), 6.64 (s, 1H), 5.12 (d,  $J = 10.5$  Hz, 1H), 4.71 (d,  $J = 17.2$  Hz, 1H), 3.84 (s, 3H), 3.78 (s, 3H), 1.14 (s, 9H).  $^{13}\text{C}$  NMR (101 MHz,  $\text{CDCl}_3$ )  $\delta$  202.4, 167.1, 142.9, 141.8, 137.7, 137.6, 133.5, 131.7, 131.4, 130.7, 129.6, 129.0, 127.8, 127.3, 125.5, 124.10, 123.4, 115.9, 108.8, 51.9, 43.8, 33.5, 28.7. ESI-MS: Calcd. for  $\text{C}_{26}\text{H}_{28}\text{NO}_3^+$   $[\text{M}+\text{H}]^+$  : 402.2069, found: 402.2072.

**(Z)-1-(4-(1-(3-fluorophenyl)buta-1,3-dien-2-yl)-1-methyl-1H-indol-3-yl)-2,2-dimethylpropan-1-one (5e)**

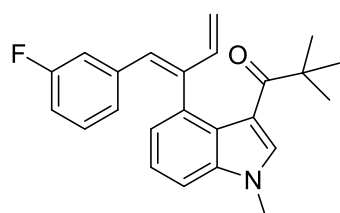

The reaction was performed according to general procedure A with 2,2-dimethyl-1-(1-methyl-1*H*-indol-3-yl)propan-1-one **1a** (0.2 mmol) and 1-(cyclopropylidenemethyl)-3-fluorobenzene **2e**

(0.4 mmol) at 80°C for 24 h. After purification by silica gel chromatography (petroleum ether/ethyl acetate =16:1,  $R_f$  = 0.17), the desired product **5e** was obtained as a yellow solid (49.4 mg, 68 % yield, Z/E = 10:1).  $^1\text{H}$  NMR (400 MHz,  $\text{CDCl}_3$ )  $\delta$  7.52 (s, 1H), 7.32 (dd,  $J$  = 11.7, 7.5 Hz, 2H), 6.96 (q,  $J$  = 7.5 Hz, 2H), 6.76 (dd,  $J$  = 17.1, 10.4 Hz, 1H), 6.67 (dd,  $J$  = 18.1, 7.9 Hz, 2H), 6.58 (s, 1H), 6.43 (d,  $J$  = 11.2 Hz, 1H), 5.10 (d,  $J$  = 10.4 Hz, 1H), 4.67 (d,  $J$  = 17.2 Hz, 1H), 3.85 (s, 3H), 1.17 (s, 9H).  $^{13}\text{C}$  NMR (101 MHz,  $\text{CDCl}_3$ )  $\delta$  202.5, 162.5 (d,  $J$  = 243.2 Hz), 143.0, 141.8, 139.7 (d,  $J$  = 8.1 Hz), 137.5, 131.7, 131.4, 129.1 (d,  $J$  = 8.5 Hz), 129.0 (d,  $J$  = 2.6 Hz), 125.5, 124.1, 123.4, 116.0, 115.9, 115.6 (d,  $J$  = 22.3 Hz), 113.1 (d,  $J$  = 21.6 Hz), 109.0, 43.9, 33.6, 28.8.  $^{19}\text{F}$  NMR (376 MHz,  $\text{CDCl}_3$ )  $\delta$  -114.49. ESI-MS: Calcd. for  $\text{C}_{24}\text{H}_{25}\text{FNO}^+$   $[\text{M}+\text{H}]^+$  : 362.1920, found: 362.1923.

**(Z)-1-(4-(1-(2-fluorophenyl)buta-1,3-dien-2-yl)-1-methyl-1H-indol-3-yl)-2,2-dimethylpropan-1-one (5f)**

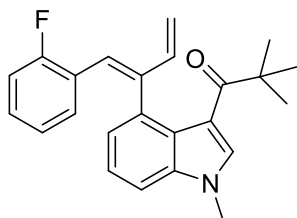

The reaction was performed according to general procedure A with 2,2-dimethyl-1-(1-methyl-1H-indol-3-yl)propan-1-one **1a** (0.2 mmol) and 1-(cyclopropylidene)methyl)-2-fluorobenzene **2f** (0.4 mmol) at 80°C for 23 h. After purification by silica gel chromatography (petroleum ether/ethyl acetate =16:1,  $R_f$  = 0.15), the desired product **5f** was obtained as a yellow solid (53.0 mg, 73 % yield, Z/E = 14.3:1).  $^1\text{H}$  NMR (400 MHz,  $\text{CDCl}_3$ )  $\delta$  7.53 (s, 1H), 7.31 (d,  $J$  = 7.8 Hz, 1H), 7.25 (t,  $J$  = 7.6 Hz, 1H), 6.92 (dd,  $J$  = 17.4, 7.8 Hz, 3H), 6.84 (s, 1H), 6.77 (dd,  $J$  = 17.2, 10.4 Hz, 1H), 6.59 (t,  $J$  = 7.6 Hz, 1H), 6.52 (dd,  $J$  = 11.0, 4.7 Hz, 1H), 5.07 (d,  $J$  = 10.5 Hz, 1H), 4.62 (d,  $J$  = 17.2 Hz, 1H), 3.85 (s, 3H), 1.23 (s, 9H).  $^{13}\text{C}$  NMR (101 MHz,  $\text{CDCl}_3$ )  $\delta$  202.5, 160.8 (d,  $J$  = 248.1 Hz), 143.3, 141.7, 137.4, 131.7, 131.5, 130.4 (d,  $J$  = 2.9 Hz), 127.7 (d,  $J$  = 8.4 Hz), 125.8, 125.4 (d,  $J$  = 11.6 Hz), 124.2, 123.4, 123.3 (d,  $J$  = 3.5 Hz), 121.3, 121.2, 116.1, 115.6, 114.7 (d,  $J$  = 22.3 Hz), 108.8, 43.9, 33.5, 28.8.  $^{19}\text{F}$  NMR (376 MHz,  $\text{CDCl}_3$ )  $\delta$  -117.01. ESI-MS: Calcd. for  $\text{C}_{24}\text{H}_{25}\text{FNO}^+$   $[\text{M}+\text{H}]^+$  : 362.1920, found: 362.1922



**(Z)-1-(4-(1-(2,4-dichlorophenyl)buta-1,3-dien-2-yl)-1-methyl-1H-indol-3-yl)-2,2-dimethylpropan-1-one (5g)**

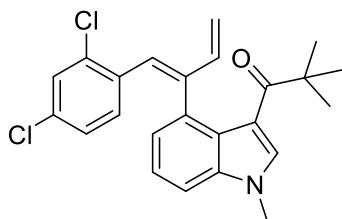

The reaction was performed according to general procedure A with 2,2-dimethyl-1-(1-methyl-1*H*-indol-3-yl)propan-1-one **1a** (0.2 mmol) and 2,4-dichloro-1-(cyclopropylidene)methylbenzene **2g** (0.4 mmol) for 24 h. After purification by silica gel chromatography (petroleum ether/ethyl acetate =16:1,  $R_f$  = 0.17), the desired product **5g** was obtained as a yellow oil (44.5 mg, 54 % yield, Z/E > 20:1).  $^1\text{H}$  NMR (400 MHz,  $\text{CDCl}_3$ )  $\delta$  7.57 (s, 1H), 7.26 (s, 2H), 7.16 (s, 1H), 6.81 (d,  $J$  = 12.0 Hz, 3H), 6.75 – 6.59 (m, 2H), 5.02 (d,  $J$  = 6.4 Hz, 1H), 4.53 (d,  $J$  = 17.2 Hz, 1H), 3.83 (s, 3H), 1.28 (s, 9H).  $^{13}\text{C}$  NMR (101 MHz,  $\text{CDCl}_3$ )  $\delta$  202.5, 144.6, 140.8, 137.3, 134.7, 134.5, 132.3, 132.1, 131.7, 131.4, 128.6, 126.3, 124.9, 124.5, 123.5, 116.2, 116.1, 108.9, 43.9, 33.5, 28.9. ESI-MS: Calcd. for  $\text{C}_{24}\text{H}_{24}\text{Cl}_2\text{NO}^+$   $[\text{M}+\text{H}]^+$  : 412.1235, found: 412.1237.

**(Z)-1-(4-(1-(2-bromo-4-methylphenyl)buta-1,3-dien-2-yl)-1-methyl-1H-indol-3-yl)-2,2-dimethylpropan-1-one (5h)**

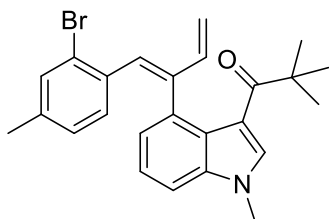

The reaction was performed according to general procedure A with 2,2-dimethyl-1-(1-methyl-1*H*-indol-3-yl)propan-1-one **1a** (0.2 mmol) and 2-bromo-1-(cyclopropylidene)methyl-4-methylbenzene **2h** (0.4 mmol) at 80°C for 23 h. After purification by silica gel chromatography (petroleum ether/ethyl acetate =16:1,  $R_f$  = 0.15), the desired product **5h** was obtained as a yellow solid (69.6 mg, 80 % yield, Z/E = 10:1).  $^1\text{H}$  NMR (400 MHz,  $\text{CDCl}_3$ )  $\delta$  7.50 (s, 1H), 7.23 (s, 1H), 7.18 (d,  $J$  = 8.3 Hz, 1H), 7.09 (t,  $J$  = 7.7 Hz, 1H), 6.78 (d,  $J$  = 3.0 Hz, 1H), 6.75 (dd,  $J$  = 13.2, 7.7 Hz, 2H), 6.65 (dd,  $J$  = 17.2, 10.5 Hz, 1H), 6.47 (d,  $J$  = 8.0 Hz, 1H), 4.93 (d,  $J$  = 10.5 Hz, 1H), 4.45 (d,  $J$  = 17.2 Hz, 1H), 3.77 (s, 3H), 2.07 (s, 3H), 1.23 (s, 9H).  $^{13}\text{C}$  NMR (101 MHz,  $\text{CDCl}_3$ )  $\delta$  202.5, 143.2, 141.1, 137.6, 137.2, 134.6, 132.4, 131.8, 131.4, 131.4, 128.6, 127.5, 126.3, 124.6, 124.5, 123.4, 116.2, 115.2, 108.6, 43.9, 33.5, 28.9, 20.8. ESI-MS: Calcd. for  $\text{C}_{25}\text{H}_{27}\text{BrNO}^+$   $[\text{M}+\text{H}]^+$  : 436.1276, found: 436.1278.

**(Z)-1-(4-(1-(3,5-bis(trifluoromethyl)phenyl)buta-1,3-dien-2-yl)-1-methyl-1H-indol-3-yl)-2,2-dimethylpropan-1-one (5i)**

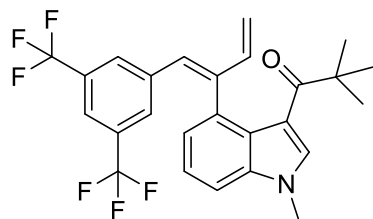

The reaction was performed according to general procedure A with 2,2-dimethyl-1-(1-methyl-1H-indol-3-yl)propan-1-one **1a** (0.2 mmol) and 1-(cyclopropylidenemethyl)-3,5-bis(trifluoromethyl)benzene **2i** (0.4 mmol) at 80°C for 29 h.

However, The solvent of this reaction needs to be changed to methanol. After purification by silica gel chromatography (petroleum ether/ethyl acetate = 16:1,  $R_f = 0.19$ ), the desired product **5i** was obtained as a white solid (66.2 mg, 69 % yield, Z/E > 20:1).  $^1\text{H NMR}$  (400 MHz,  $\text{CDCl}_3$ )  $\delta$  7.55 (s, 1H), 7.40 (s, 1H), 7.37 (d,  $J = 4.4$  Hz, 1H), 7.34 (d,  $J = 8.3$  Hz, 1H), 7.08 (s, 2H), 6.99 (d,  $J = 6.8$  Hz, 1H), 6.84 (dd,  $J = 17.1, 10.4$  Hz, 1H), 6.60 (s, 1H), 5.28 (d,  $J = 10.5$  Hz, 1H), 4.94 (d,  $J = 17.1$  Hz, 1H), 3.86 (s, 3H), 1.11 (s, 9H).  $^{13}\text{C NMR}$  (101 MHz,  $\text{CDCl}_3$ )  $\delta$  201.8, 145.6, 141.2, 139.4, 137.7, 132.6, 130.8 (q,  $J = 32.9$  Hz), 130.4, 128.9 (d,  $J = 2.9$  Hz), 126.6, 125.2, 124.0, 123.7, 123.3 (q,  $J = 545.4, 272.8$  Hz), 119.3 (dt,  $J = 7.0, 3.5$  Hz), 118.1, 115.5, 109.4, 43.7, 33.6, 28.8.  $^{19}\text{F NMR}$  (376 MHz,  $\text{CDCl}_3$ )  $\delta$  -63.39. ESI-MS: Calcd. for  $\text{C}_{26}\text{H}_{24}\text{F}_6\text{NO}^+ [\text{M}+\text{H}]^+$  : 480.1762, found: 480.1769.

**(Z)-1-(4-(1-(3,5-dimethoxyphenyl)buta-1,3-dien-2-yl)-1-methyl-1H-indol-3-yl)-2,2-dimethylpropan-1-one (5j)**

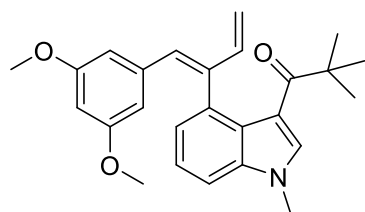

The reaction was performed according to general procedure A with 2,2-dimethyl-1-(1-methyl-1H-indol-3-yl)propan-1-one **1a** (0.2 mmol) and 1-(cyclopropylidenemethyl)-3,5-dimethoxybenzene **2j** (0.4 mmol) at 120°C for 35 h. After

purification by silica gel chromatography (petroleum ether/ethyl acetate = 8:1,  $R_f = 0.13$ ), the desired product **5j** was obtained as a yellow solid (48.1 mg, 60 % yield, Z/E = 5:1).  $^1\text{H NMR}$  (400 MHz,  $\text{CDCl}_3$ )  $\delta$  7.39 (s, 1H), 7.28 – 7.22 (m, 1H), 7.20 (d,  $J = 7.7$  Hz, 1H), 6.96 (d,  $J = 6.8$  Hz, 1H), 6.73 (dd,  $J = 17.1, 10.4$  Hz, 1H), 6.43 (s, 1H), 6.01 (s, 1H), 5.88 (d,  $J = 1.9$  Hz, 2H), 5.06 (d,  $J = 10.3$  Hz, 1H), 4.70 (d,  $J = 17.1$  Hz, 1H), 3.73 (s, 3H), 3.25 (s, 6H), 1.04 (s, 9H).  $^{13}\text{C NMR}$  (101 MHz,  $\text{CDCl}_3$ )  $\delta$  202.4, 159.9, 142.3, 141.9, 139.0, 137.5, 132.0, 131.6, 130.3, 125.5, 124.3, 123.4, 116.0, 115.6, 108.6, 107.0, 100.0, 54.8, 43.8, 33.5, 28.7. ESI-MS: Calcd. for  $\text{C}_{26}\text{H}_{30}\text{NO}_3^+ [\text{M}+\text{H}]^+$  : 404.2226, found: 404.2229.

**(Z)-2,2-dimethyl-1-(1-methyl-4-(1-(3,4,5-trimethoxyphenyl)buta-1,3-dien-2-yl)-1H-indol-3-yl)propan-1-one (5k)**

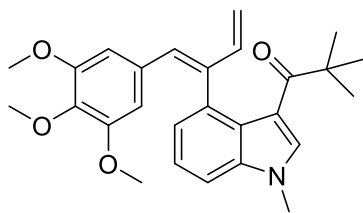

The reaction was performed according to general procedure A with 2,2-dimethyl-1-(1-methyl-1H-indol-3-yl)propan-1-one **1a** (0.2 mmol) and 5-(cyclopropylidenemethyl)-1,2,3-trimethoxybenzene **2k** (0.4 mmol) at 120°C for 31.5 h. After purification by silica gel chromatography (petroleum ether/ethyl acetate = 4:1,  $R_f$  = 0.12), the desired product **5k** was obtained as a white solid (28.4 mg, 33 % yield, Z/E > 20:1). <sup>1</sup>H NMR (400 MHz, CDCl<sub>3</sub>) δ 7.48 (s, 1H), 7.37 (t,  $J$  = 7.7 Hz, 1H), 7.30 (d,  $J$  = 8.1 Hz, 1H), 7.07 (d,  $J$  = 7.1 Hz, 1H), 6.83 (dd,  $J$  = 17.1, 10.4 Hz, 1H), 6.47 (s, 1H), 5.99 (s, 2H), 5.15 (d,  $J$  = 10.4 Hz, 1H), 4.80 (d,  $J$  = 17.1 Hz, 1H), 3.83 (s, 3H), 3.68 (s, 3H), 3.33 (s, 6H), 1.09 (s, 9H). <sup>13</sup>C NMR (101 MHz, CDCl<sub>3</sub>) δ 202.4, 152.4, 142.3, 140.9, 137.6, 136.7, 132.7, 132.0, 131.6, 130.1, 125.4, 124.4, 123.5, 116.0, 115.3, 108.6, 106.4, 60.8, 55.4, 43.8, 33.5, 28.7. ESI-MS: Calcd. for C<sub>27</sub>H<sub>32</sub>NO<sub>4</sub><sup>+</sup> [M+H]<sup>+</sup> : 434.2331, found: 434.2330.

**(Z)-2,2-dimethyl-1-(1-methyl-4-(1-(naphthalen-2-yl)buta-1,3-dien-2-yl)-1H-indol-3-yl)propan-1-one (5l)**

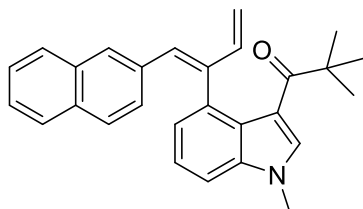

The reaction was performed according to general procedure A with 2,2-dimethyl-1-(1-methyl-1H-indol-3-yl)propan-1-one **1a** (0.2 mmol) and 2-(cyclopropylidenemethyl)naphthalene **2l** (0.4 mmol) at 80°C for 22 h. However, the solvent of this reaction needs to be changed to methanol. After purification by silica gel chromatography (petroleum ether/ethyl acetate = 8:1,  $R_f$  = 0.19), the desired product **5l** was obtained as a yellow oil (54.8 mg, 70 % yield, Z/E = 2.3:1). <sup>1</sup>H NMR (400 MHz, CDCl<sub>3</sub>) δ 7.94 (s, 1H), 7.85 (d,  $J$  = 8.2 Hz, 1H), 7.81 (d,  $J$  = 8.3 Hz, 2H), 7.58 (t,  $J$  = 8.7 Hz, 2H), 7.52 – 7.40 (m, 4H), 7.39 – 7.24 (m, 5H), 7.24 – 7.08 (m, 2H), 7.01 (d,  $J$  = 6.9 Hz, 1H), 6.90 – 6.73 (m, 1H), 6.63 (s, 1H), 5.22 (d,  $J$  = 10.7 Hz, 1H), 5.10 (d,  $J$  = 10.4 Hz, 1H), 5.02 (d,  $J$  = 17.3 Hz, 1H), 4.70 (d,  $J$  = 17.1 Hz, 1H), 3.80 (s, 1H), 3.79 (s, 3H), 1.23 (s, 9H), 1.11 (s, 4H). <sup>13</sup>C NMR (101 MHz, CDCl<sub>3</sub>) δ 203.3, 202.5, 142.3, 142.1, 137.5, 137.5, 135.8, 135.4, 135.4, 135.2, 133.4, 133.3, 132.4, 132.2, 131.9, 131.5, 131.1, 130.4, 129.7, 128.9, 128.6, 128.2, 128.2, 128.0, 127.7, 127.5, 127.4, 127.3, 127.0, 126.2, 126.0, 125.7, 125.6, 125.5, 124.4, 123.8, 123.4, 122.8, 118.1,

116.1, 115.9, 115.2, 108.7, 108.6, 44.2, 43.8, 33.5, 33.4, 28.7, 28.5. ESI-MS: Calcd. for  $C_{28}H_{28}NO^+$   $[M+H]^+$  : 394.2171, found: 394.2175.

**(Z)-1-(4-(1-(2,2-difluorobenzo[d][1,3]dioxol-5-yl)buta-1,3-dien-2-yl)-1-methyl-1*H*-indol-3-yl)-2,2-dimethylpropan-1-one (5m)**

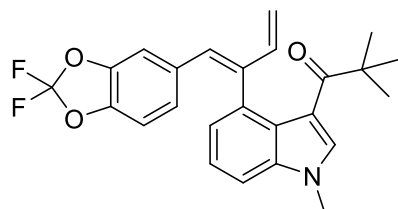

The reaction was performed according to general procedure A with 2,2-dimethyl-1-(1-methyl-1*H*-indol-3-yl)propan-1-one **1a** (0.2 mmol) and 5-(cyclopropylidenemethyl)-2,2-difluorobenzo[*d*][1,3]dioxole **2m** (0.4 mmol) for 29.5 h. After purification by silica gel chromatography (petroleum ether/ethyl acetate = 16:1,  $R_f$  = 0.13), the desired product **5m** was obtained as a white solid (36.4 mg, 43 % yield, Z/E = 13.6:1).  $^1H$  NMR (400 MHz,  $CDCl_3$ )  $\delta$  7.54 (s, 1H), 7.34 (d,  $J$  = 8.1 Hz, 1H), 7.29 (d,  $J$  = 7.3 Hz, 1H), 6.91 (d,  $J$  = 6.9 Hz, 1H), 6.77 (q,  $J$  = 8.4 Hz, 2H), 6.69 (dd,  $J$  = 17.1, 10.4 Hz, 1H), 6.58 (s, 1H), 6.44 (s, 1H), 5.04 (d,  $J$  = 10.4 Hz, 1H), 4.55 (d,  $J$  = 17.2 Hz, 1H), 3.92 – 3.84 (m, 3H), 1.21 (s, 9H).  $^{13}C$  NMR (101 MHz,  $CDCl_3$ )  $\delta$  202.7, 143.5, 142.3, 142.0, 141.5, 137.5, 134.1, 131.6, 131.3, 128.6, 125.8, 125.7, 124.0, 123.6, 116.0, 115.7, 109.9, 109.1, 108.7, 44.0, 33.6, 28.8.  $^{19}F$  NMR (376 MHz,  $CDCl_3$ )  $\delta$  -50.31. ESI-MS: Calcd. for  $C_{25}H_{24}F_2NO_3^+$   $[M+H]^+$  : 424.1724, found: 424.1718.

**(Z)-1-(4-(1-(9-ethyl-9*H*-carbazol-3-yl)buta-1,3-dien-2-yl)-1-methyl-1*H*-indol-3-yl)-2,2-dimethylpropan-1-one (5n)**

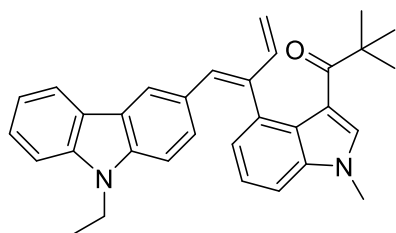

The reaction was performed according to general procedure A with 2,2-dimethyl-1-(1-methyl-1*H*-indol-3-yl)propan-1-one **1a** (0.2 mmol) and 3-(cyclopropylidenemethyl)-9-ethyl-9*H*-carbazole **2n** (0.4 mmol) for 27.5 h. However, the solvent of this reaction needs to be changed to methanol. After purification by silica gel chromatography (petroleum ether/ethyl acetate = 8:1,  $R_f$  = 0.22), the desired product **5n** was obtained as a yellow solid (27.8 mg, 30 % yield, Z/E = 4:1).  $^1H$  NMR (400 MHz,  $CDCl_3$ )  $\delta$  8.24 (s, 1H), 8.15 (d,  $J$  = 7.7 Hz, 1H), 7.64 (dd,  $J$  = 21.1, 8.0 Hz, 2H), 7.55 – 7.07 (m, 18H), 7.04 – 6.95 (m, 1H), 6.89 (dd,  $J$  = 17.1, 10.4 Hz, 1H), 6.81 (s, 1H), 6.72 (s, 1H), 5.22 (d,  $J$  = 10.7 Hz, 1H), 5.10 (d,  $J$  = 10.4 Hz, 1H), 5.02 (d,  $J$  = 17.3 Hz, 1H), 4.74 (d,  $J$  = 17.1 Hz, 1H), 4.39 (dd,  $J$  = 14.3, 7.1 Hz, 3H), 3.85 (s, 4H), 1.47 (t,  $J$  = 7.1 Hz, 6H), 1.27 (s, 12H), 1.08 (s, 3H).  $^{13}C$  NMR (101 MHz,  $CDCl_3$ )  $\delta$  203.5, 142.6, 140.3, 140.3, 139.1, 137.5,

136.3, 135.8, 130.9, 130.8, 128.8, 128.1, 128.0, 126.3, 125.6, 125.3, 124.4, 123.9, 123.5, 123.2, 122.9, 122.8, 121.8, 121.3, 120.7, 120.2, 118.9, 117.0, 116.1, 113.7, 108.6, 108.4, 108.4, 108.0, 107.8, 44.3, 37.7, 33.5, 28.7, 28.5, 14.0. ESI-MS: Calcd. for C<sub>32</sub>H<sub>33</sub>N<sub>2</sub>O<sup>+</sup> [M+H]<sup>+</sup> : 461.2593, found: 461.2587.

**(Z)-1-(4-(1-(benzo[b]thiophen-2-yl)buta-1,3-dien-2-yl)-1-methyl-1H-indol-3-yl)-2,2-dimethylpropan-1-one (5o)**

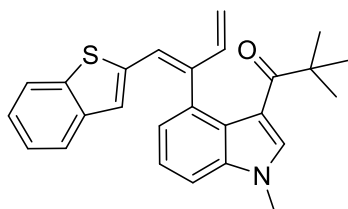

The reaction was performed according to general procedure A with 2,2-dimethyl-1-(1-methyl-1H-indol-3-yl)propan-1-one **1a** (0.2 mmol) and 2-(cyclopropylidene)methyl)benzo[b]thiophene **2o** (0.4 mmol) for 27.5 h. However, the solvent of this reaction needs to be changed to methanol. After purification by silica gel chromatography (petroleum ether/ethyl acetate = 8:1, R<sub>f</sub> = 0.18), the desired product **5o** was obtained as a yellow oil (53.6 mg, 67 % yield, Z/E = 1.8:1). <sup>1</sup>H NMR (400 MHz, CDCl<sub>3</sub>) δ 7.81 (d, J = 7.7 Hz, 1H), 7.75 (d, J = 7.7 Hz, 1H), 7.61 – 7.04 (m, 14H), 6.97 – 6.76 (m, 1H), 6.64 (s, 1H), 5.34 (d, J = 10.7 Hz, 1H), 5.18 (d, J = 10.4 Hz, 1H), 5.08 (t, J = 14.9 Hz, 1H), 4.78 (t, J = 16.2 Hz, 1H), 3.88 (d, J = 10.7 Hz, 2H), 3.82 (s, 3H), 1.26 (s, 9H), 1.14 (s, 5H). <sup>13</sup>C NMR (101 MHz, CDCl<sub>3</sub>) δ 203.3, 202.9, 142.6, 142.0, 141.5, 141.4, 141.1, 140.7, 140.5, 139.8, 138.8, 137.7, 137.4, 135.2, 135.0, 131.5, 131.2, 130.0, 126.1, 125.8, 125.0, 124.9, 124.9, 124.6, 124.4, 124.2, 123.9, 123.8, 123.8, 123.4, 123.3, 123.0, 122.7, 122.4, 122.0, 121.8, 119.2, 116.2, 115.8, 115.8, 109.6, 108.9, 44.2, 44.1, 33.5, 33.4, 28.6, 28.5. ESI-MS: Calcd. for C<sub>26</sub>H<sub>26</sub>NOS<sup>+</sup> [M+H]<sup>+</sup> : 400.1735, found: 400.1737.

**(E)-2,2-dimethyl-1-(1-methyl-4-(1-(3-phenylprop-1-en-1-yl)cyclopropyl)-1H-indol-3-yl)propan-1-one (6a)**

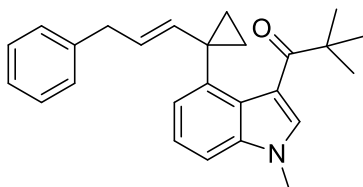

The reaction was performed according to general procedure B with 2,2-dimethyl-1-(1-methyl-1H-indol-3-yl)propan-1-one **1a** (0.2 mmol) and (3-cyclopropylidene)propyl)benzene **3a** (0.4 mmol) for 24 h. After purification by silica gel chromatography (petroleum ether/ethyl acetate = 16:1, R<sub>f</sub> = 0.15), the desired product **6a** was obtained as a colorless oil (58.1 mg, 78 % yield, E/Z > 20:1). <sup>1</sup>H NMR (400 MHz, CDCl<sub>3</sub>) δ 7.45 (s, 1H), 7.21 (ddd, J = 11.4, 5.9, 2.6 Hz, 5H), 7.14 (dd, J = 12.3, 7.1 Hz, 3H), 5.68 (d, J = 15.3 Hz, 1H), 5.24 – 5.10 (m, 1H), 3.77 (s, 3H), 3.33 (d, J = 6.9 Hz, 2H), 1.39 (s, 9H), 1.09 (d, J = 6.7 Hz, 2H), 0.99 (t, J = 5.2 Hz, 2H). <sup>13</sup>C NMR

(101 MHz, CDCl<sub>3</sub>)  $\delta$  204.5, 141.6, 139.8, 137.8, 137.5, 130.6, 128.7, 128.2, 126.3, 125.7, 125.3, 125.2, 122.8, 116.1, 108.1, 44.3, 39.0, 33.4, 29.1, 27.6. ESI-MS: Calcd. for C<sub>26</sub>H<sub>30</sub>NO<sup>+</sup> [M+H]<sup>+</sup> : 372.2327, found: 372.2328.

**(E)-1-(4-(1-(3,7-dimethylocta-1,6-dien-1-yl)cyclopropyl)-1-methyl-1H-indol-3-yl)-2,2-dimethylpropan-1-one (6b)**

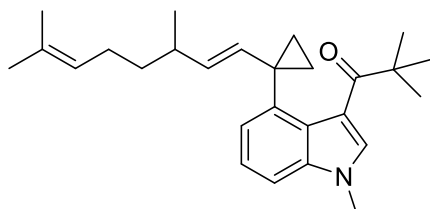

The reaction was performed according to general procedure B with 2,2-dimethyl-1-(1-methyl-1H-indol-3-yl)propan-1-one **1a** (0.2 mmol) and (3,7-dimethyloct-6-en-1-ylidene)cyclopropane **3b** (0.4 mmol) for 24 h. After purification by silica gel chromatography (petroleum ether/ethyl acetate = 16:1, R<sub>f</sub> = 0.21), the desired product **6b** was obtained as a yellow oil (56.2 mg, 72 % yield, E/Z > 20:1). <sup>1</sup>H NMR (400 MHz, CDCl<sub>3</sub>)  $\delta$  7.43 (s, 1H), 7.24 (dd, *J* = 9.0, 7.4 Hz, 2H), 7.19 (t, *J* = 6.7 Hz, 1H), 5.62 (d, *J* = 15.4 Hz, 1H), 5.06 (t, *J* = 7.0 Hz, 1H), 4.98 (dd, *J* = 15.4, 7.3 Hz, 1H), 3.78 (s, 3H), 1.91 (dd, *J* = 15.0, 7.2 Hz, 2H), 1.64 (s, 3H), 1.53 (s, 3H), 1.37 (s, 9H), 1.22 (ddd, *J* = 13.3, 7.1, 3.5 Hz, 2H), 1.01 (s, 2H), 0.93 (s, 2H), 0.91 (d, *J* = 6.7 Hz, 3H). <sup>13</sup>C NMR (101 MHz, CDCl<sub>3</sub>)  $\delta$  204.5, 138.6, 137.5, 135.6, 132.9, 131.0, 130.4, 126.2, 125.3, 125.3, 122.8, 116.1, 107.8, 44.3, 37.6, 35.8, 33.4, 29.1, 27.6, 25.9, 25.8, 20.5, 17.7. ESI-MS: Calcd. for C<sub>27</sub>H<sub>38</sub>NO<sup>+</sup> [M+H]<sup>+</sup> : 392.2953, found: 392.2945.

**1-(4-(1-(cyclohexylidenemethyl)cyclopropyl)-1-methyl-1H-indol-3-yl)-2,2-dimethylpropan-1-one (6c)**

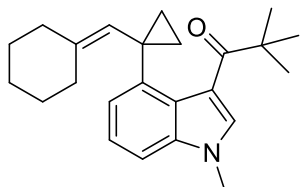

The reaction was performed according to general procedure B with 2,2-dimethyl-1-(1-methyl-1H-indol-3-yl)propan-1-one **1a** (0.2 mmol) and (cyclopropylidenemethyl)cyclohexane **3c** (0.4 mmol) for 24 h. After purification by silica gel chromatography (petroleum ether/ethyl acetate = 16:1, R<sub>f</sub> = 0.17), the desired product **6c** was obtained as a white solid (35.4 mg, 51 % yield, E/Z > 20:1). <sup>1</sup>H NMR (400 MHz, CDCl<sub>3</sub>)  $\delta$  7.46 (s, 1H), 7.33 (d, *J* = 7.2 Hz, 1H), 7.20 (t, *J* = 7.7 Hz, 1H), 7.17 – 7.11 (m, 1H), 5.84 (s, 1H), 3.76 (s, 3H), 2.34 – 2.20 (m, 2H), 2.03 (d, *J* = 23.5 Hz, 2H), 1.43 (s, 9H), 1.40 (d, *J* = 2.4 Hz, 6H), 1.12 (s, 2H), 0.92 (d, *J* = 1.8 Hz, 2H). <sup>13</sup>C NMR (101 MHz, CDCl<sub>3</sub>)  $\delta$  205.0, 142.3, 140.5, 137.6, 130.3, 126.6, 125.8, 122.8, 116.4, 107.6, 44.3, 37.1, 33.4, 29.8, 29.1, 28.6, 27.3, 26.8, 23.9, 16.4. ESI-MS: Calcd. for C<sub>24</sub>H<sub>32</sub>NO<sup>+</sup> [M+H]<sup>+</sup> : 350.2484, found: 350.2488.

**(E)-1-(4-(1-(hept-1-en-1-yl)cyclopropyl)-1-methyl-1H-indol-3-yl)-2,2-dimethylpropan-1-one (6d)**

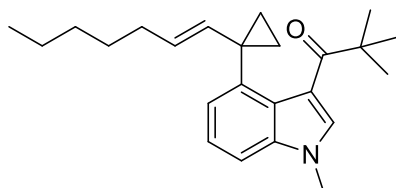

The reaction was performed according to general procedure B with 2,2-dimethyl-1-(1-methyl-1H-indol-3-yl)propan-1-one **1a** (0.2 mmol) and heptylidene cyclopropane **4d** (0.4 mmol) at 100 °C for 31.5 h. After purification by silica gel chromatography (petroleum ether/ethyl acetate = 16:1,  $R_f$  = 0.19), the desired product **6d** was obtained as a white solid (38.6 mg, 53 % yield, E/Z = 7:1).  $^1\text{H}$  NMR (400 MHz,  $\text{CDCl}_3$ )  $\delta$  7.41 (s, 1H), 7.20 (dd,  $J$  = 14.8, 2.7 Hz, 3H), 5.49 (d,  $J$  = 15.3 Hz, 1H), 5.07 – 4.91 (m, 1H), 3.76 (s, 3H), 1.94 (d,  $J$  = 5.2 Hz, 2H), 1.36 (s, 9H), 1.29 (d,  $J$  = 3.8 Hz, 2H), 1.25 (s, 2H), 1.21 (s, 2H), 1.06 (s, 2H), 0.95 (s, 2H), 0.83 (s, 3H).  $^{13}\text{C}$  NMR (101 MHz,  $\text{CDCl}_3$ )  $\delta$  204.7, 138.1, 137.5, 130.3, 127.2, 126.2, 124.9, 122.7, 116.2, 108.0, 44.2, 33.4, 32.6, 31.7, 29.4, 29.0, 27.4, 22.6, 14.2. ESI-MS: Calcd. for  $\text{C}_{24}\text{H}_{34}\text{NO}^+$   $[\text{M}+\text{H}]^+$  : 352.2640, found: 352.2637.

**(E)-1-(5-fluoro-1-methyl-4-(1-(3-phenylprop-1-en-1-yl)cyclopropyl)-1H-indol-3-yl)-2,2-dimethylpropan-1-one (6e)**

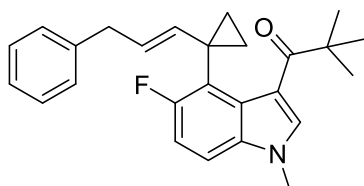

The reaction was performed according to general procedure B with 1-(5-fluoro-1-methyl-1H-indol-3-yl)-2,2-dimethylpropan-1-one **1b** (0.1 mmol) and (3-cyclopropylidene)propylbenzene **3a** (0.2 mmol) for 24 h. After purification by silica gel chromatography (petroleum ether/ethyl acetate = 8:1,  $R_f$  = 0.32), the desired product **6e** was obtained as a white solid (36.2 mg, 93 % yield, E/Z > 20:1).  $^1\text{H}$  NMR (400 MHz,  $\text{CDCl}_3$ )  $\delta$  7.51 (s, 1H), 7.25 (d,  $J$  = 4.4 Hz, 4H), 7.18 – 7.13 (m, 1H), 7.13 – 7.09 (m, 1H), 7.05 – 6.98 (m, 1H), 5.75 (d,  $J$  = 15.2 Hz, 1H), 5.43 (dt,  $J$  = 14.2, 7.0 Hz, 1H), 3.77 (s, 3H), 3.43 (d,  $J$  = 7.0 Hz, 2H), 1.41 (s, 9H), 1.27 (dd,  $J$  = 14.6, 7.5 Hz, 2H), 0.86 (t,  $J$  = 6.9 Hz, 2H).  $^{13}\text{C}$  NMR (101 MHz,  $\text{CDCl}_3$ )  $\delta$  203.9, 159.1 (d,  $J$  = 238.5 Hz), 141.8, 137.4, 134.0, 131.9, 128.5 (d,  $J$  = 52.8 Hz), 127.1 (d,  $J$  = 5.6 Hz), 125.7, 125.5, 123.4 (d,  $J$  = 16.3 Hz), 116.2 (d,  $J$  = 4.9 Hz), 112.1, 111.8, 108.8 (d,  $J$  = 10.6 Hz), 44.2, 38.8, 33.6, 29.1, 21.6.  $^{19}\text{F}$  NMR (376 MHz,  $\text{CDCl}_3$ )  $\delta$  -120.26. ESI-MS: Calcd. for  $\text{C}_{26}\text{H}_{29}\text{FNO}^+$   $[\text{M}+\text{H}]^+$  : 390.2233, found: 390.2240.

**(E)-1-(6-fluoro-1-methyl-4-(1-(3-phenylprop-1-en-1-yl)cyclopropyl)-1H-indol-3-yl)-2,2-dimethylpropan-1-one (6f)**

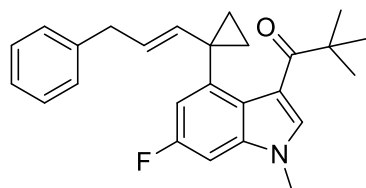

The reaction was performed according to general procedure B with 1-(6-fluoro-1-methyl-1H-indol-3-yl)-2,2-dimethylpropan-1-one **1d** (0.1 mmol) and (3-cyclopropylidene)propylbenzene **3a** (0.2 mmol) for 24 h. After purification by silica gel chromatography (petroleum ether/ethyl acetate = 8:1,  $R_f$  = 0.40), the desired product **6f** was obtained as a colorless oil (22.9 mg, 59 % yield, E/Z > 20:1).  $^1\text{H}$  NMR (400 MHz,  $\text{CDCl}_3$ )  $\delta$  7.43 (s, 1H), 7.23 (d,  $J$  = 7.2 Hz, 2H), 7.18 – 7.11 (m, 3H), 7.01 (dd,  $J$  = 10.7, 2.2 Hz, 1H), 6.86 (dd,  $J$  = 8.8, 2.2 Hz, 1H), 5.61 (d,  $J$  = 15.3 Hz, 1H), 5.24 – 5.10 (m, 1H), 3.73 (s, 3H), 3.33 (d,  $J$  = 6.9 Hz, 2H), 1.38 (s, 9H), 1.07 (s, 2H), 1.00 (t,  $J$  = 5.4 Hz, 2H).  $^{13}\text{C}$  NMR (101 MHz,  $\text{CDCl}_3$ )  $\delta$  204.3, 159.9 (d,  $J$  = 239.7 Hz), 141.4, 139.7 (d,  $J$  = 8.9 Hz), 139.0, 137.7 (d,  $J$  = 12.3 Hz), 130.8, 128.5 (d,  $J$  = 37.1 Hz), 125.8 (d,  $J$  = 13.3 Hz), 122.7, 116.3, 113.6, 113.3, 94.5 (d,  $J$  = 25.7 Hz), 44.3, 39.0, 33.5, 29.0, 27.6.  $^{19}\text{F}$  NMR (376 MHz,  $\text{CDCl}_3$ )  $\delta$  -119.84. ESI-MS: Calcd. for  $\text{C}_{26}\text{H}_{29}\text{FNO}^+$   $[\text{M}+\text{H}]^+$  : 390.2233, found: 390.2232.

**(E)-1-(6-bromo-1-methyl-4-(1-(3-phenylprop-1-en-1-yl)cyclopropyl)-1H-indol-3-yl)-2,2-dimethylpropan-1-one (6g)**

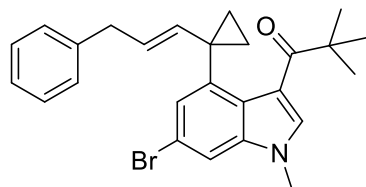

The reaction was performed according to general procedure B with 1-(6-bromo-1-methyl-1H-indol-3-yl)-2,2-dimethylpropan-1-one **1f** (0.1 mmol) and (3-cyclopropylidene)propylbenzene **3a** (0.2 mmol) for 24 h. After purification by silica gel chromatography (petroleum ether/ethyl acetate = 8:1,  $R_f$  = 0.42), the desired product **6g** was obtained as a colorless oil (24.6 mg, 55 % yield, E/Z > 20:1).  $^1\text{H}$  NMR (400 MHz,  $\text{CDCl}_3$ )  $\delta$  7.41 (s, 1H), 7.35 (d,  $J$  = 2.6 Hz, 2H), 7.23 (d,  $J$  = 7.2 Hz, 2H), 7.15 (d,  $J$  = 6.4 Hz, 3H), 5.60 (d,  $J$  = 15.3 Hz, 1H), 5.22 – 5.08 (m, 1H), 3.74 (s, 3H), 3.32 (d,  $J$  = 6.9 Hz, 2H), 1.37 (s, 9H), 1.08 (s, 2H), 1.00 (s, 2H).  $^{13}\text{C}$  NMR (101 MHz,  $\text{CDCl}_3$ )  $\delta$  204.3, 141.3, 139.63 139.0, 138.3, 130.83, 128.1, 128.1, 128., 126.2, 125.8, 125.7, 125.32 116.3, 116.3, 111.2, 44.3, 39.0, 33.5, 29.0, 27.5. ESI-MS: Calcd. for  $\text{C}_{26}\text{H}_{29}\text{BrNO}^+$   $[\text{M}+\text{H}]^+$  : 450.1433, found: 450.1436.



**(E)-1-(6-methoxy-1-methyl-4-(1-(3-phenylprop-1-en-1-yl)cyclopropyl)-1H-indol-3-yl)-2,2-dimethylpropan-1-one (6h)**

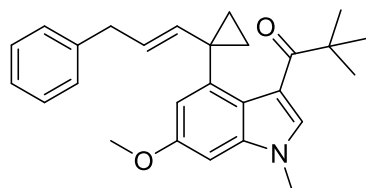

The reaction was performed according to general procedure B with 1-(6-methoxy-1-methyl-1H-indol-3-yl)-2,2-dimethylpropan-1-one **1h** (0.1 mmol) and (3-cyclopropylidene)propyl)benzene **3a** (0.2 mmol) for 24 h. After purification by silica gel chromatography (petroleum ether/ethyl acetate = 8:1,  $R_f$  = 0.32), the desired product **6h** was obtained as a white solid (17.4 mg, 43 % yield, E/Z > 20:1).  $^1\text{H}$  NMR (400 MHz,  $\text{CDCl}_3$ )  $\delta$  7.38 (s, 1H), 7.23 (d,  $J$  = 6.3 Hz, 2H), 7.17 (s, 3H), 6.93 (s, 1H), 6.63 (s, 1H), 5.66 (d,  $J$  = 15.2 Hz, 1H), 5.33 – 5.08 (m, 1H), 3.87 (s, 3H), 3.74 (s, 3H), 3.34 (d,  $J$  = 5.8 Hz, 2H), 1.39 (s, 9H), 1.10 (s, 2H), 1.00 (s, 2H).  $^{13}\text{C}$  NMR (101 MHz,  $\text{CDCl}_3$ )  $\delta$  204.4, 156.6, 141.5, 139.4, 139.0, 138.4, 131.1, 129.8, 128.7, 128.3, 125.7, 125.4, 120.5, 116.1, 114.6, 91.4, 55.7, 44.2, 39.0, 33.4, 29.1, 27.7. ESI-MS: Calcd. for  $\text{C}_{27}\text{H}_{31}\text{NO}_2^+$   $[\text{M}+\text{H}]^+$  : 402.2433, found: 402.2433.

**(E)-1-(6-(dibenzo[b,d]thiophen-2-yl)-1-methyl-4-(1-(3-phenylprop-1-en-1-yl)cyclopropyl)-1H-indol-3-yl)-2,2-dimethylpropan-1-one (6i)**

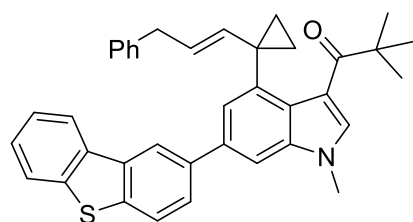

The reaction was performed according to general procedure B with 1-(6-(dibenzo[b,d]thiophen-2-yl)-1-methyl-1H-indol-3-yl)-2,2-dimethylpropan-1-one **1k** (0.1 mmol) and (3-cyclopropylidene)propyl)benzene **3a** (0.2 mmol) for 24 h. After purification by silica gel chromatography (petroleum ether/ethyl acetate = 8:1,  $R_f$  = 0.33), the desired product **6i** was obtained as a colorless oil (25.8 mg, 47 % yield, E/Z > 20:1).  $^1\text{H}$  NMR (400 MHz,  $\text{CDCl}_3$ )  $\delta$  8.37 (d,  $J$  = 1.2 Hz, 1H), 8.23 (dd,  $J$  = 6.1, 3.0 Hz, 1H), 7.91 (d,  $J$  = 8.3 Hz, 1H), 7.88 (dd,  $J$  = 5.9, 3.0 Hz, 1H), 7.75 (dd,  $J$  = 8.3, 1.6 Hz, 1H), 7.63 (d,  $J$  = 1.3 Hz, 1H), 7.52 (s, 1H), 7.49 (dd,  $J$  = 5.5, 2.4 Hz, 3H), 7.24 (d,  $J$  = 7.2 Hz, 2H), 7.20 (d,  $J$  = 6.9 Hz, 2H), 7.16 (d,  $J$  = 7.0 Hz, 1H), 5.76 (d,  $J$  = 15.3 Hz, 1H), 5.31 (dt,  $J$  = 9.2, 7.0 Hz, 1H), 3.88 (s, 3H), 3.38 (d,  $J$  = 6.9 Hz, 2H), 1.42 (s, 9H), 1.17 (t,  $J$  = 5.3 Hz, 2H), 1.06 (t,  $J$  = 5.1 Hz, 2H).  $^{13}\text{C}$  NMR (101 MHz,  $\text{CDCl}_3$ )  $\delta$  204.4, 141.6, 140.0, 139.6, 138.4, 138.4, 138.3, 136.2, 135.7, 131.3, 128.7, 128.3, 127.0, 126.7, 125.8, 125.7, 125.6, 125.2, 124.5, 123.1, 123.0, 121.9, 120.3, 116.1, 106.7, 44.4, 39.0, 33.6, 29.1, 27.9. ESI-MS: Calcd. for  $\text{C}_{38}\text{H}_{36}\text{NOS}^+$   $[\text{M}+\text{H}]^+$  : 554.2518, found: 554.2510.

**(E)-1-(7-chloro-1-methyl-4-(1-(3-phenylprop-1-en-1-yl)cyclopropyl)-1H-indol-3-yl)-2,2-dimethylpropan-1-one (6j)**

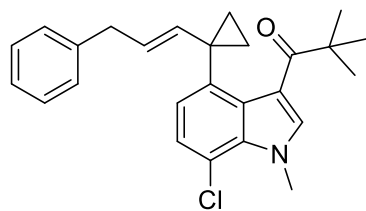

The reaction was performed according to general procedure B with 1-(7-chloro-1-methyl-1H-indol-3-yl)-2,2-dimethylpropan-1-one **1n** (0.1 mmol) and (3-cyclopropylidenepropyl)benzene **3a** (0.2 mmol) for 24 h. After purification by silica gel chromatography (petroleum ether/ethyl acetate = 16:1,  $R_f = 0.19$ ), the desired product **6j** was obtained as a colorless oil (31.1 mg, 77 % yield, E/Z > 20:1).  $^1\text{H}$  NMR (400 MHz,  $\text{CDCl}_3$ )  $\delta$  7.35 (s, 1H), 7.22 (d,  $J = 7.0$  Hz, 2H), 7.15 (d,  $J = 7.0$  Hz, 3H), 7.11 (d,  $J = 4.2$  Hz, 2H), 5.59 (d,  $J = 15.3$  Hz, 1H), 5.24 – 5.07 (m, 1H), 4.15 (s, 3H), 3.33 (d,  $J = 6.9$  Hz, 2H), 1.37 (s, 9H), 1.03 (t,  $J = 5.2$  Hz, 2H), 0.96 (t,  $J = 5.3$  Hz, 2H).  $^{13}\text{C}$  NMR (101 MHz,  $\text{CDCl}_3$ )  $\delta$  204.6, 141.4, 139.3, 136.5, 132.9, 132.7, 129.2, 128.7, 128.3, 126.0, 125.8, 125.6, 124.4, 116.2, 115.7, 44.4, 39.0, 37.9, 29.0, 27.2. ESI-MS: Calcd. for  $\text{C}_{26}\text{H}_{29}\text{ClNO}^+$   $[\text{M}+\text{H}]^+$  : 406.1938, found: 406.1940.

## 5. Mechanistic studies

### (1) H/D Exchange experiment

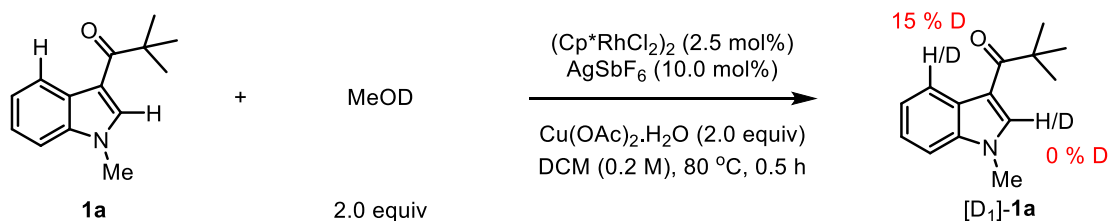

The reaction was performed according to general procedure A with 2,2-dimethyl-1-(1-methyl-1H-indol-3-yl)propan-1-one **1a** (0.1 mmol, 1.0 equiv), and MeOD (0.2 mmol, 2.0 equiv) instead of (cyclopropylidene)methyl)benzene **2**. After 0.5 h, the reaction was cooled to room temperature, diluted with 5 ml CH<sub>2</sub>Cl<sub>2</sub>, filtered through a celite pad and washed with 10-20 ml CH<sub>2</sub>Cl<sub>2</sub>. The filtrate was concentrated under reduced pressure and the residue was purified by flash column chromatography on silica gel (petroleum ether/ethyl acetate = 8:1) to provide the product **[D<sub>1</sub>]-1a** as a white solid (20.4 mg, 92%).

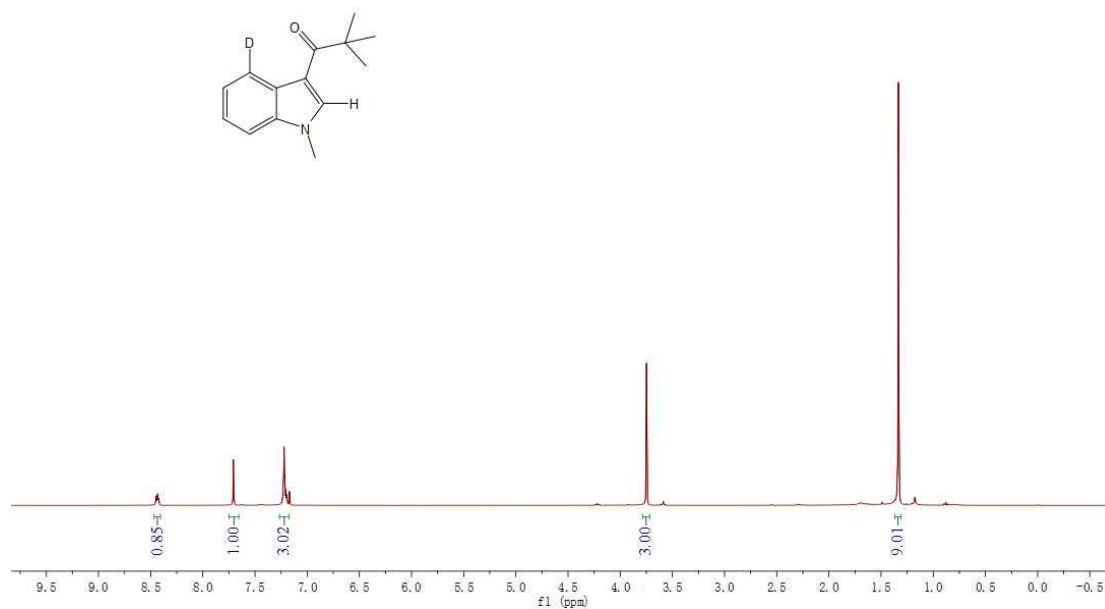

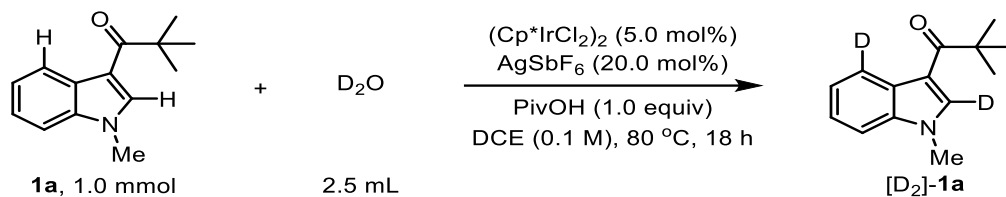

Under N<sub>2</sub> atmosphere, a 50 mL round bottom flask was charged with 2,2-dimethyl-1-(1-methyl-1*H*-indol-3-yl)propan-1-one **1a** (215.3 mg, 1.0 mmol), (Cp\*IrCl<sub>2</sub>)<sub>2</sub> (39.8 mg, 5.0 mol%), AgSbF<sub>6</sub> (68.7 mg, 20.0 mol%), PivOH (102.1 mg, 1.0 equiv), D<sub>2</sub>O (2.5 ml), and DCE (12.5 mL). Then the tube was sealed and the mixture was stirred at 80 °C for 18 h. Subsequently, the reaction solution was cooled to room temperature, diluted with 15 ml CH<sub>2</sub>Cl<sub>2</sub>, filtered through a celite pad and washed with 20-30 ml CH<sub>2</sub>Cl<sub>2</sub>, the filtrate was concentrated under reduced pressure and the residue was purified by flash column chromatography on silica gel (petroleum ether/ethyl acetate = 8:1) to provide the product [D<sub>2</sub>]-**1a** as a white solid (211.5 mg, 97%).

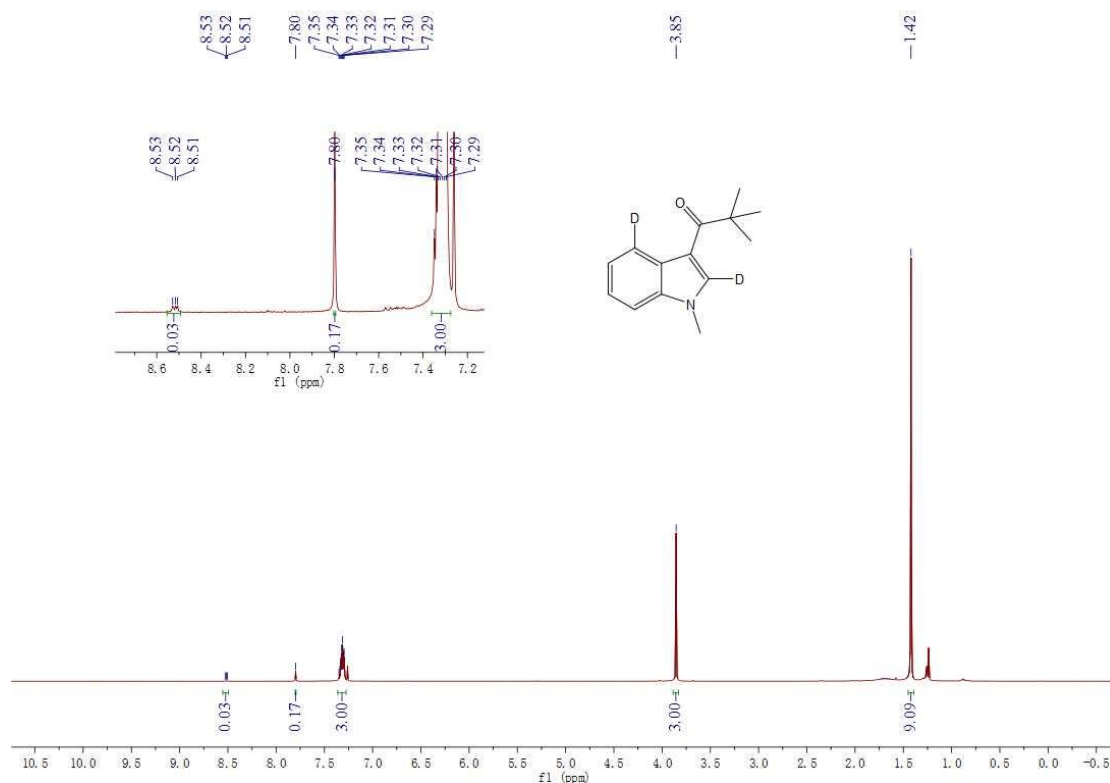

## (2) Competitive experiment

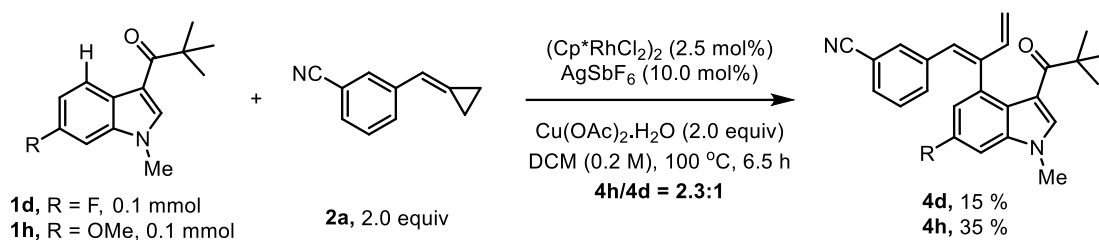

The reaction was performed according to general procedure A with 1-(6-fluoro-1-methyl-1*H*-indol-3-yl)-2,2-dimethylpropan-1-one **1d** (0.1 mmol, 0.5 equiv), 1-(6-methoxy-1-methyl-1*H*-indol-3-yl)-2,2-dimethylpropan-1-one **1h** (0.1 mmol, 0.5 equiv), and 3-(cyclopropylidene)methylbenzonitrile **2a** (0.4 mmol, 2.0 equiv) for 6.5 h. After that, the resulting mixture was purified by silica gel chromatography (petroleum ether/ethyl acetate = 4:1) to get the pure product of **4d** (11.6 mg, 15%) and **4h** (27.5 mg, 35%). The **4h/4d** value was determined to be **2.3:1**.

## (3) Kinetic isotope effect experiment

Procedure for kinetic isotopic effect experiments: To five identical Schlenk tube, 2,2-dimethyl-1-(1-methyl-1*H*-indol-3-yl)propan-1-one **1a** (0.1 mmol, 1.0 equiv), 3-(cyclopropylidene)methylbenzonitrile **2a** (0.2 mmol, 2 equiv), 1-iodo-4-methoxybenzene (0.5 equiv), (Cp\*RhCl<sub>2</sub>)<sub>2</sub> (1.6 mg, 0.0025 mmol, 2.5 mmol%), AgSbF<sub>6</sub> (3.4 mg, 0.01 mmol, 10.0 mmol%), Cu(OAc)<sub>2</sub>·H<sub>2</sub>O (39.9 mg, 0.2 mmol, 2.0 equiv), and DCM (0.5 mL) were added. The resulting mixture was stirred at 100 °C with same speed. Those five reaction will stop (rapid cooling and quenching with water) after 10 min, 20 min, 30 min, 40 min, 50 min respectively, and diluted with 6.0 ml DCM. Then an aliquot (1000 μL) was taken in five reactions. The yield of product **4a** was determined by NMR using 1-iodo-4-methoxybenzene as the internal standard.

To five identical Schlenk tube, 2,2-dimethyl-1-(1-methyl-1*H*-indol-3-yl-2,4-d<sub>2</sub>)propan-1-one [**D**<sub>2</sub>]-**1a** (0.1 mmol, 1.0 equiv), 3-(cyclopropylidene)methylbenzonitrile **2a** (0.2 mmol, 2 equiv), 1-iodo-4-methoxybenzene (0.5 equiv), (Cp\*RhCl<sub>2</sub>)<sub>2</sub> (1.6 mg, 0.0025 mmol, 2.5 mmol%), AgSbF<sub>6</sub> (3.4 mg, 0.01 mmol, 10.0 mmol%), Cu(OAc)<sub>2</sub>·H<sub>2</sub>O (39.9 mg, 0.2 mmol, 2.0 equiv), and DCM (0.5 mL) were added. The resulting mixture was stirred at 100 °C with same speed. Those five reaction will stop (rapid cooling and quenching with water) after 10 min, 20 min, 30 min, 40 min, 50 min respectively, and diluted with 6.0 ml DCM. Then an aliquot (1000 μL) was taken in five reactions.

The yield of product [D<sub>1</sub>]-**4a** was determined by NMR using 1-iodo-4-methoxybenzene as the internal standard. The K<sub>H</sub>/K<sub>D</sub> value was determined to be 0.29/0.27 = **1.1**.

| Time (min) | <b>4a</b> yield (%) | [D <sub>1</sub> ]- <b>4a</b> yield (%) |
|------------|---------------------|----------------------------------------|
| 10         | 11%                 | 9%                                     |
| 20         | 14%                 | 12%                                    |
| 30         | 16%                 | 15%                                    |
| 40         | 19%                 | 17%                                    |
| 50         | 23%                 | 20%                                    |

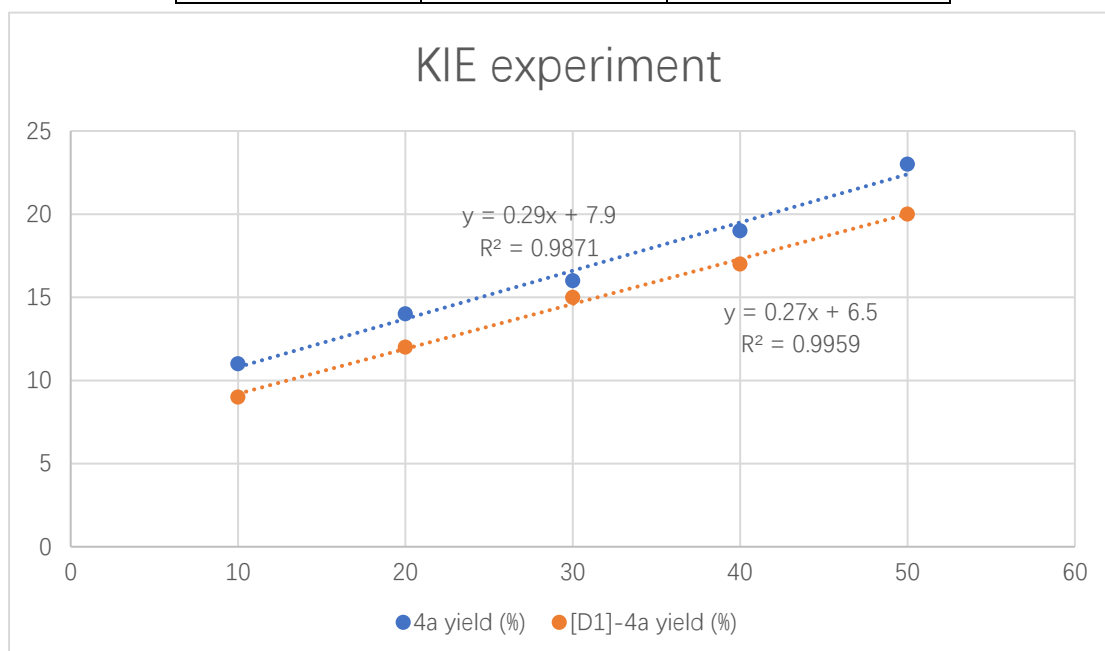

## 6. Synthetic application of the product

### Scale-up Synthesis

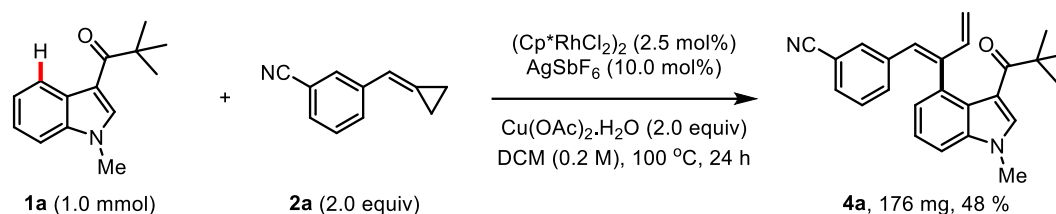

According to the general procedure A, to a Schlenk tube, 2,2-dimethyl-1-(1-methyl-1*H*-indol-3-yl)propan-1-one **1a** (215.3 mg, 1.0 mmol, 1.0 equiv), 3-(cyclopropylidenemethyl)benzonitrile **2a** (310.4 mg, 2.0 mmol, 2.0 equiv),  $(\text{Cp}^*\text{RhCl}_2)_2$  (15.5 mg, 0.025 mmol, 2.5 mmol%),  $\text{AgSbF}_6$  (34.4 mg, 0.10 mmol, 10.0 mmol%),  $\text{Cu}(\text{OAc})_2 \cdot \text{H}_2\text{O}$  (399.3 mg, 2.0 mmol, 2.0 equiv), and DCM (5.0 mL) were added. The resulting mixture was stirred at 100 °C for 24 h. After that, the resulting mixture was purified by silica gel chromatography (petroleum ether/ethyl acetate = 8:1) to get the product **4a** as a yellow solid (175.7 mg, 48 % yield).

### Gram-s Synthesis

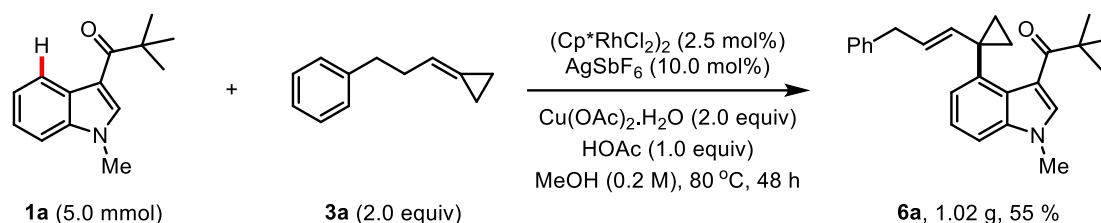

According to the general procedure B, to a 100 ml Schlenk tube, 2,2-dimethyl-1-(1-methyl-1*H*-indol-3-yl)propan-1-one **1a** (1.08 g, 5.0 mmol, 1.0 equiv), (3-cyclopropylidenepropyl)benzene **3a** (1.58 g, 10.0 mmol, 2.0 equiv),  $(\text{Cp}^*\text{RhCl}_2)_2$  (77.3 mg, 0.125 mmol, 2.5 mmol%),  $\text{AgSbF}_6$  (171.8 mg, 0.50 mmol, 10.0 mmol%),  $\text{Cu}(\text{OAc})_2 \cdot \text{H}_2\text{O}$  (2.00 g, 10.0 mmol, 2.0 equiv), HOAc (286  $\mu\text{L}$ , 5.0 mmol, 1.0 equiv) and DCM (25.0 mL) were added. The resulting mixture was stirred at 80 °C for 24 h. After that, the resulting mixture was purified by silica gel chromatography (petroleum ether/ethyl acetate = 8:1) to get the product **6a** as a yellow oil (1.02 g, 55 % yield).

## Additional Experiments:

### Removal of the pivaloyl directing group experiment:

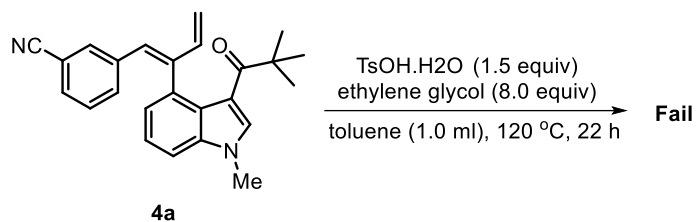

The pivaloyl directing group in **4a** could not be removed according to the existing literature method (*ACS Catal.* **2019**, *9*, 6372-6379, **most used method**). We also tried other methods, but they all failed, it may be because the allyl alcohol moiety and isopentenyl fragment in the product are unstable under acidic conditions or high temperature conditions.



## 7. X-Ray crystal data for compound 4n

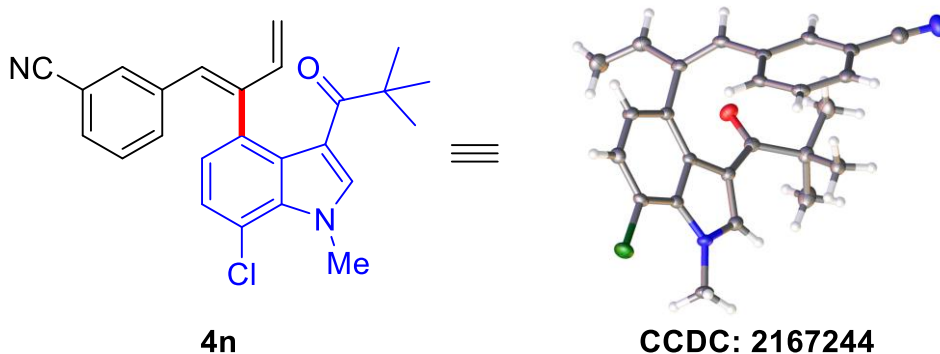

X-ray-quality crystal was obtained by slow diffusion of Petroleum ether into a dilute dichloromethane solution of **4n** at room temperature under air. Thermal ellipsoids drawn at the 50 % probability level. Crystal data were obtained on a SuperNova, Dual, Cu at zero, AtlasS2 diffractometer using Mo K $\alpha$  radiation ( $\lambda = 0.71073 \text{ \AA}$ ). The crystal was kept at 200.00(10) K during data collection.

**Table 1 Crystal data and structure refinement for 4n.**

|                                                |                                                    |
|------------------------------------------------|----------------------------------------------------|
| Identification code                            | 1230-2                                             |
| Empirical formula                              | C <sub>25</sub> H <sub>23</sub> ClN <sub>2</sub> O |
| Formula weight                                 | 402.90                                             |
| Temperature/K                                  | 169.99(10)                                         |
| Crystal system                                 | triclinic                                          |
| Space group                                    | P-1                                                |
| a/ $\text{\AA}$                                | 9.9471(18)                                         |
| b/ $\text{\AA}$                                | 10.8316(16)                                        |
| c/ $\text{\AA}$                                | 11.5440(19)                                        |
| $\alpha$ / $^\circ$                            | 70.149(14)                                         |
| $\beta$ / $^\circ$                             | 68.430(16)                                         |
| $\gamma$ / $^\circ$                            | 80.750(13)                                         |
| Volume/ $\text{\AA}^3$                         | 1087.0(3)                                          |
| Z                                              | 2                                                  |
| $\rho_{\text{calc}}/\text{cm}^3$               | 1.231                                              |
| $\mu/\text{mm}^{-1}$                           | 0.193                                              |
| F(000)                                         | 424.0                                              |
| Crystal size/ $\text{mm}^3$                    | 0.14 $\times$ 0.13 $\times$ 0.12                   |
| Radiation                                      | MoK $\alpha$ ( $\lambda = 0.71073$ )               |
| 2 $\theta$ range for data collection/ $^\circ$ | 3.984 to 50                                        |

|                                             |                                                               |
|---------------------------------------------|---------------------------------------------------------------|
| Index ranges                                | -11 ≤ h ≤ 11, -12 ≤ k ≤ 8, -13 ≤ l ≤ 10                       |
| Reflections collected                       | 6966                                                          |
| Independent reflections                     | 3822 [R <sub>int</sub> = 0.0274, R <sub>sigma</sub> = 0.0499] |
| Data/restraints/parameters                  | 3822/0/266                                                    |
| Goodness-of-fit on F <sup>2</sup>           | 1.056                                                         |
| Final R indexes [I ≥ 2σ(I)]                 | R <sub>1</sub> = 0.0446, wR <sub>2</sub> = 0.1039             |
| Final R indexes [all data]                  | R <sub>1</sub> = 0.0616, wR <sub>2</sub> = 0.1128             |
| Largest diff. peak/hole / e Å <sup>-3</sup> | 0.19/-0.23                                                    |

### Crystal structure determination of 4n

**Crystal Data** for C<sub>25</sub>H<sub>23</sub>ClN<sub>2</sub>O (*M* = 402.90 g/mol): triclinic, space group P-1 (no. 2), *a* = 9.9471(18) Å, *b* = 10.8316(16) Å, *c* = 11.5440(19) Å, α = 70.149(14)°, β = 68.430(16)°, γ = 80.750(13)°, *V* = 1087.0(3) Å<sup>3</sup>, *Z* = 2, *T* = 169.99(10) K, μ(MoKα) = 0.193 mm<sup>-1</sup>, *D*<sub>calc</sub> = 1.231 g/cm<sup>3</sup>, 6966 reflections measured (3.984° ≤ 2θ ≤ 50°), 3822 unique (R<sub>int</sub> = 0.0274, R<sub>sigma</sub> = 0.0499) which were used in all calculations. The final R<sub>1</sub> was 0.0446 (I > 2σ(I)) and wR<sub>2</sub> was 0.1128 (all data).

### Refinement model description

**Table 2 Fractional Atomic Coordinates (×10<sup>4</sup>) and Equivalent Isotropic Displacement Parameters (Å<sup>2</sup>×10<sup>3</sup>) for 4n. U<sub>eq</sub> is defined as 1/3 of the trace of the orthogonalised U<sub>ij</sub> tensor.**

| Atom | <i>x</i>   | <i>y</i>   | <i>z</i>    | U(eq)     |
|------|------------|------------|-------------|-----------|
| Cl1  | 6206.2(6)  | 5075.7(5)  | 2809.3(5)   | 44.42(18) |
| O1   | 9578.7(14) | 7261.9(13) | 6142.3(12)  | 40.6(4)   |
| N1   | 7372.6(17) | 4479.4(14) | 5273.8(14)  | 31.8(4)   |
| N2   | 3912(2)    | 8480(2)    | 11181.4(18) | 59.3(6)   |
| C1   | 7733.6(19) | 8012.1(17) | 4106.4(16)  | 28.1(4)   |
| C2   | 7292(2)    | 8375.0(18) | 3020.7(17)  | 34.3(5)   |
| C3   | 6836(2)    | 7474.2(18) | 2630.1(17)  | 34.7(5)   |
| C4   | 6820(2)    | 6150.4(18) | 3328.2(17)  | 30.3(4)   |
| C5   | 7285.7(19) | 5730.1(17) | 4410.9(16)  | 27.3(4)   |
| C6   | 7757.4(19) | 6649.5(17) | 4813.9(16)  | 26.6(4)   |
| C7   | 8111.8(19) | 5884.5(17) | 5973.1(16)  | 29.4(4)   |
| C8   | 7847(2)    | 4598.2(18) | 6190.2(17)  | 33.8(5)   |
| C9   | 8759(2)    | 6348.2(18) | 6714.1(17)  | 30.0(4)   |
| C10  | 8404(2)    | 5677.5(18) | 8207.2(17)  | 34.2(5)   |
| C11  | 6815(2)    | 5325(2)    | 8897.9(17)  | 38.0(5)   |
| C12  | 8718(3)    | 6653(2)    | 8777.9(19)  | 54.2(6)   |
| C13  | 9412(2)    | 4443(2)    | 8428(2)     | 51.1(6)   |
| C14  | 7059(2)    | 3201.9(18) | 5264.0(19)  | 39.9(5)   |
| C15  | 8123(2)    | 9079.0(17) | 4469.0(17)  | 30.1(4)   |

**Table 2 Fractional Atomic Coordinates ( $\times 10^4$ ) and Equivalent Isotropic Displacement Parameters ( $\text{\AA}^2 \times 10^3$ ) for 4n.  $U_{\text{eq}}$  is defined as 1/3 of the trace of the orthogonalised  $U_{\text{IJ}}$  tensor.**

| Atom | x        | y          | z          | U(eq)   |
|------|----------|------------|------------|---------|
| C16  | 9457(2)  | 9775.5(19) | 3575.8(19) | 39.7(5) |
| C17  | 10374(2) | 9517(2)    | 2513(2)    | 53.4(6) |
| C18  | 7317(2)  | 9451.6(17) | 5523.7(17) | 32.2(5) |
| C19  | 5943(2)  | 8950.1(17) | 6536.1(17) | 29.8(4) |
| C20  | 5641(2)  | 9014.7(17) | 7799.9(17) | 34.0(5) |
| C21  | 4364(2)  | 8539.4(18) | 8803.6(17) | 35.1(5) |
| C22  | 3321(2)  | 8050.0(18) | 8552.5(18) | 37.4(5) |
| C23  | 3584(2)  | 8028.3(18) | 7298.0(18) | 37.3(5) |
| C24  | 4873(2)  | 8451.9(17) | 6309.6(17) | 33.3(5) |
| C25  | 4110(2)  | 8533(2)    | 10127(2)   | 43.7(5) |

**Table 3 Anisotropic Displacement Parameters ( $\text{\AA}^2 \times 10^3$ ) for 4n. The Anisotropic displacement factor exponent takes the form:  $-2\pi^2[h^2a^*U_{11}+2hka^*b^*U_{12}+\dots]$ .**

| Atom | $U_{11}$ | $U_{22}$ | $U_{33}$ | $U_{23}$  | $U_{13}$  | $U_{12}$  |
|------|----------|----------|----------|-----------|-----------|-----------|
| Cl1  | 53.4(4)  | 43.1(3)  | 50.7(3)  | -22.7(2)  | -23.0(3)  | -8.0(3)   |
| O1   | 40.7(9)  | 39.0(8)  | 43.9(8)  | -4.4(6)   | -18.7(6)  | -13.8(7)  |
| N1   | 39.7(10) | 21.5(9)  | 35.1(8)  | -9.0(6)   | -12.0(7)  | -4.5(7)   |
| N2   | 68.5(15) | 69.3(15) | 41.6(11) | -21.8(9)  | -17.7(10) | 2.0(11)   |
| C1   | 28.6(11) | 25.0(10) | 31.5(10) | -9.8(8)   | -9.0(8)   | -3.1(8)   |
| C2   | 43.0(13) | 24.8(11) | 37.2(10) | -7.1(8)   | -18.7(9)  | 0.4(9)    |
| C3   | 40.0(12) | 35.9(12) | 33.1(10) | -10.9(8)  | -18.4(9)  | 0.9(9)    |
| C4   | 29.7(11) | 31.9(11) | 34.6(10) | -17.5(8)  | -8.7(8)   | -4.5(8)   |
| C5   | 26.8(11) | 24.9(10) | 29.8(9)  | -10.5(7)  | -7.2(8)   | -0.8(8)   |
| C6   | 25.0(10) | 25.8(10) | 29.2(9)  | -10.7(7)  | -6.9(8)   | -1.8(8)   |
| C7   | 31.2(11) | 26.7(11) | 28.7(9)  | -5.7(7)   | -9.8(8)   | -3.2(8)   |
| C8   | 38.9(12) | 27.9(11) | 32.5(10) | -5.0(8)   | -12.8(9)  | -2.4(9)   |
| C9   | 26.4(11) | 28.6(11) | 35.6(10) | -9.3(8)   | -12.6(8)  | 1.6(9)    |
| C10  | 32.5(11) | 37.7(12) | 33.9(10) | -7.3(8)   | -15.7(8)  | -2.3(9)   |
| C11  | 37.4(12) | 39.8(12) | 33.8(10) | -8.2(8)   | -11.7(9)  | -1.0(9)   |
| C12  | 66.2(16) | 65.9(16) | 41.2(12) | -14.0(11) | -26.5(11) | -16.7(13) |
| C13  | 41.2(14) | 57.8(16) | 43.9(12) | -3.0(10)  | -18.0(10) | 7.1(11)   |
| C14  | 46.7(13) | 25.2(11) | 48.7(12) | -13.5(9)  | -12.7(10) | -6.9(9)   |
| C15  | 35.8(12) | 22.4(10) | 35.6(10) | -7.3(8)   | -17.4(9)  | -1.1(8)   |
| C16  | 41.0(13) | 33.1(12) | 48.6(12) | -12.0(9)  | -17.4(10) | -6.9(10)  |
| C17  | 43.5(14) | 55.1(16) | 57.8(14) | -18.5(11) | -5.0(11)  | -17.6(12) |

**Table 3 Anisotropic Displacement Parameters ( $\text{\AA}^2 \times 10^3$ ) for 4n. The Anisotropic displacement factor exponent takes the form:  $-2\pi^2[h^2a^{*2}U_{11}+2hka^*b^*U_{12}+\dots]$ .**

| Atom | $U_{11}$ | $U_{22}$ | $U_{33}$ | $U_{23}$ | $U_{13}$  | $U_{12}$ |
|------|----------|----------|----------|----------|-----------|----------|
| C18  | 40.6(12) | 23.2(10) | 40.8(11) | -11.5(8) | -21.0(9)  | -1.8(9)  |
| C19  | 38.4(12) | 18.6(10) | 37.3(10) | -10.4(7) | -18.0(9)  | 2.4(8)   |
| C20  | 40.0(12) | 26.7(11) | 44.8(11) | -16.5(8) | -22.1(10) | 4.3(9)   |
| C21  | 47.2(13) | 24.1(11) | 35.8(10) | -11.8(8) | -17.1(9)  | 6.9(9)   |
| C22  | 41.4(13) | 23.9(11) | 41.4(11) | -6.8(8)  | -10.9(9)  | -0.7(9)  |
| C23  | 41.1(13) | 27.4(11) | 49.8(12) | -14.7(9) | -19.1(10) | -3.5(9)  |
| C24  | 44.1(13) | 24.8(11) | 36.1(10) | -13.1(8) | -16.2(9)  | -0.7(9)  |
| C25  | 50.2(14) | 38.8(13) | 42.0(13) | -12.8(9) | -17.2(10) | 3.8(10)  |

**Table 4 Bond Lengths for 4n.**

| Atom | Atom | Length/ $\text{\AA}$ | Atom | Atom | Length/ $\text{\AA}$ |
|------|------|----------------------|------|------|----------------------|
| C11  | C4   | 1.7486(18)           | C9   | C10  | 1.552(2)             |
| O1   | C9   | 1.225(2)             | C10  | C11  | 1.529(3)             |
| N1   | C5   | 1.394(2)             | C10  | C12  | 1.543(3)             |
| N1   | C8   | 1.355(2)             | C10  | C13  | 1.544(3)             |
| N1   | C14  | 1.471(2)             | C15  | C16  | 1.477(3)             |
| N2   | C25  | 1.142(2)             | C15  | C18  | 1.342(3)             |
| C1   | C2   | 1.391(2)             | C16  | C17  | 1.320(3)             |
| C1   | C6   | 1.425(2)             | C18  | C19  | 1.471(3)             |
| C1   | C15  | 1.501(2)             | C19  | C20  | 1.402(2)             |
| C2   | C3   | 1.397(3)             | C19  | C24  | 1.406(2)             |
| C3   | C4   | 1.385(3)             | C20  | C21  | 1.394(3)             |
| C4   | C5   | 1.398(2)             | C21  | C22  | 1.394(3)             |
| C5   | C6   | 1.433(2)             | C21  | C25  | 1.451(3)             |
| C6   | C7   | 1.450(2)             | C22  | C23  | 1.382(3)             |
| C7   | C8   | 1.381(2)             | C23  | C24  | 1.383(3)             |
| C7   | C9   | 1.483(2)             |      |      |                      |

**Table 5 Bond Angles for 4n.**

| Atom | Atom | Atom | Angle/ $^\circ$ | Atom | Atom | Atom | Angle/ $^\circ$ |
|------|------|------|-----------------|------|------|------|-----------------|
| C5   | N1   | C14  | 129.60(15)      | C7   | C9   | C10  | 120.21(15)      |
| C8   | N1   | C5   | 107.96(14)      | C11  | C10  | C9   | 112.06(14)      |
| C8   | N1   | C14  | 122.44(14)      | C11  | C10  | C12  | 108.56(17)      |
| C2   | C1   | C6   | 117.48(16)      | C11  | C10  | C13  | 110.87(16)      |

**Table 5 Bond Angles for 4n.**

| Atom | Atom | Atom | Angle/°    | Atom | Atom | Atom | Angle/°    |
|------|------|------|------------|------|------|------|------------|
| C2   | C1   | C15  | 118.01(15) | C12  | C10  | C9   | 107.74(15) |
| C6   | C1   | C15  | 124.50(15) | C12  | C10  | C13  | 108.70(17) |
| C1   | C2   | C3   | 122.99(17) | C13  | C10  | C9   | 108.80(17) |
| C4   | C3   | C2   | 120.13(17) | C16  | C15  | C1   | 117.04(17) |
| C3   | C4   | C11  | 117.97(14) | C18  | C15  | C1   | 124.03(16) |
| C3   | C4   | C5   | 119.14(16) | C18  | C15  | C16  | 118.90(17) |
| C5   | C4   | C11  | 122.88(14) | C17  | C16  | C15  | 126.29(19) |
| N1   | C5   | C4   | 130.84(16) | C15  | C18  | C19  | 129.70(17) |
| N1   | C5   | C6   | 108.20(14) | C20  | C19  | C18  | 118.54(16) |
| C4   | C5   | C6   | 120.96(16) | C20  | C19  | C24  | 117.21(17) |
| C1   | C6   | C5   | 119.27(15) | C24  | C19  | C18  | 124.20(16) |
| C1   | C6   | C7   | 134.76(16) | C21  | C20  | C19  | 121.10(17) |
| C5   | C6   | C7   | 105.91(15) | C20  | C21  | C25  | 120.46(18) |
| C6   | C7   | C9   | 127.66(16) | C22  | C21  | C20  | 120.43(17) |
| C8   | C7   | C6   | 106.02(15) | C22  | C21  | C25  | 119.10(18) |
| C8   | C7   | C9   | 126.10(15) | C23  | C22  | C21  | 118.86(18) |
| N1   | C8   | C7   | 111.91(15) | C22  | C23  | C24  | 120.94(18) |
| O1   | C9   | C7   | 119.73(15) | C23  | C24  | C19  | 121.34(17) |
| O1   | C9   | C10  | 120.06(15) | N2   | C25  | C21  | 177.6(2)   |

**Table 6 Torsion Angles for 4n.**

| A   | B   | C   | D   | Angle/°     | A   | B  | C   | D   | Angle/°     |
|-----|-----|-----|-----|-------------|-----|----|-----|-----|-------------|
| C11 | C4  | C5  | N1  | -0.2(3)     | C6  | C7 | C9  | C10 | 149.99(18)  |
| C11 | C4  | C5  | C6  | -178.95(14) | C7  | C9 | C10 | C11 | -39.3(2)    |
| O1  | C9  | C10 | C11 | 140.88(19)  | C7  | C9 | C10 | C12 | -158.63(18) |
| O1  | C9  | C10 | C12 | 21.5(3)     | C7  | C9 | C10 | C13 | 83.7(2)     |
| O1  | C9  | C10 | C13 | -96.2(2)    | C8  | N1 | C5  | C4  | -177.80(19) |
| N1  | C5  | C6  | C1  | -178.31(15) | C8  | N1 | C5  | C6  | 1.1(2)      |
| N1  | C5  | C6  | C7  | -0.8(2)     | C8  | C7 | C9  | O1  | 143.5(2)    |
| C1  | C2  | C3  | C4  | -0.4(3)     | C8  | C7 | C9  | C10 | -36.3(3)    |
| C1  | C6  | C7  | C8  | 177.1(2)    | C9  | C7 | C8  | N1  | -174.28(17) |
| C1  | C6  | C7  | C9  | -8.1(3)     | C14 | N1 | C5  | C4  | 3.3(3)      |
| C1  | C15 | C16 | C17 | -2.8(3)     | C14 | N1 | C5  | C6  | -177.85(18) |
| C1  | C15 | C18 | C19 | 0.3(3)      | C14 | N1 | C8  | C7  | 178.00(17)  |
| C2  | C1  | C6  | C5  | -2.1(3)     | C15 | C1 | C2  | C3  | -176.79(18) |
| C2  | C1  | C6  | C7  | -178.78(19) | C15 | C1 | C6  | C5  | 176.62(17)  |
| C2  | C1  | C15 | C16 | -69.3(2)    | C15 | C1 | C6  | C7  | -0.1(3)     |

**Table 6 Torsion Angles for 4n.**

| A  | B  | C   | D   | Angle/°    | A   | B   | C   | D   | Angle/°     |
|----|----|-----|-----|------------|-----|-----|-----|-----|-------------|
| C2 | C1 | C15 | C18 | 108.8(2)   | C15 | C18 | C19 | C20 | 150.62(19)  |
| C2 | C3 | C4  | C11 | 178.80(15) | C15 | C18 | C19 | C24 | -32.0(3)    |
| C2 | C3 | C4  | C5  | -1.0(3)    | C16 | C15 | C18 | C19 | 178.39(16)  |
| C3 | C4 | C5  | N1  | 179.65(18) | C18 | C15 | C16 | C17 | 178.9(2)    |
| C3 | C4 | C5  | C6  | 0.9(3)     | C18 | C19 | C20 | C21 | -179.18(17) |
| C4 | C5 | C6  | C1  | 0.7(3)     | C18 | C19 | C24 | C23 | -178.17(17) |
| C4 | C5 | C6  | C7  | 178.27(16) | C19 | C20 | C21 | C22 | -3.4(3)     |
| C5 | N1 | C8  | C7  | -1.0(2)    | C19 | C20 | C21 | C25 | 175.87(17)  |
| C5 | C6 | C7  | C8  | 0.1(2)     | C20 | C19 | C24 | C23 | -0.8(3)     |
| C5 | C6 | C7  | C9  | 174.86(18) | C20 | C21 | C22 | C23 | 0.9(3)      |
| C6 | C1 | C2  | C3  | 2.0(3)     | C21 | C22 | C23 | C24 | 1.6(3)      |
| C6 | C1 | C15 | C16 | 112.0(2)   | C22 | C23 | C24 | C19 | -1.7(3)     |
| C6 | C1 | C15 | C18 | -69.9(3)   | C24 | C19 | C20 | C21 | 3.3(3)      |
| C6 | C7 | C8  | N1  | 0.5(2)     | C25 | C21 | C22 | C23 | -178.40(18) |
| C6 | C7 | C9  | O1  | -30.2(3)   |     |     |     |     |             |

**Table 7 Hydrogen Atom Coordinates ( $\text{\AA} \times 10^4$ ) and Isotropic Displacement Parameters ( $\text{\AA}^2 \times 10^3$ ) for 4n.**

| Atom | x        | y        | z       | U(eq) |
|------|----------|----------|---------|-------|
| H2   | 7299.3   | 9257.61  | 2532.47 | 41    |
| H3   | 6543.84  | 7763.82  | 1900.01 | 42    |
| H8   | 7977.58  | 3897.16  | 6882.51 | 41    |
| H11A | 6209.01  | 6084.02  | 8665.6  | 57    |
| H11B | 6605.54  | 5033.85  | 9827.69 | 57    |
| H11C | 6634.09  | 4635.01  | 8634.09 | 57    |
| H12A | 9719.69  | 6864.82  | 8369.86 | 81    |
| H12B | 8506.64  | 6261.83  | 9703.63 | 81    |
| H12C | 8124.57  | 7440.1   | 8615.44 | 81    |
| H13A | 9205.38  | 3816.77  | 8100.36 | 77    |
| H13B | 9255.29  | 4060.64  | 9346.83 | 77    |
| H13C | 10400.87 | 4684.2   | 7974.6  | 77    |
| H14A | 6103.55  | 3245.02  | 5226.14 | 60    |
| H14B | 7115.39  | 2534.61  | 6045.95 | 60    |
| H14C | 7752.19  | 2992.35  | 4513.62 | 60    |
| H16  | 9672.7   | 10462.51 | 3781.6  | 48    |
| H17A | 10204.3  | 8838.73  | 2267.69 | 64    |
| H17B | 11188.65 | 10012.84 | 2010.81 | 64    |

**Table 7 Hydrogen Atom Coordinates ( $\text{\AA}\times 10^4$ ) and Isotropic Displacement Parameters ( $\text{\AA}^2\times 10^3$ ) for 4n.**

| <b>Atom</b> | <b>x</b> | <b>y</b> | <b>z</b> | <b>U(eq)</b> |
|-------------|----------|----------|----------|--------------|
| H18         | 7682.4   | 10128.5  | 5630.67  | 39           |
| H20         | 6303.48  | 9380.71  | 7972.09  | 41           |
| H22         | 2462.69  | 7743.28  | 9218.08  | 45           |
| H23         | 2884.81  | 7724.64  | 7115.29  | 45           |
| H24         | 5034.85  | 8406.19  | 5478.53  | 40           |

## 8. Copies of product NMR spectra

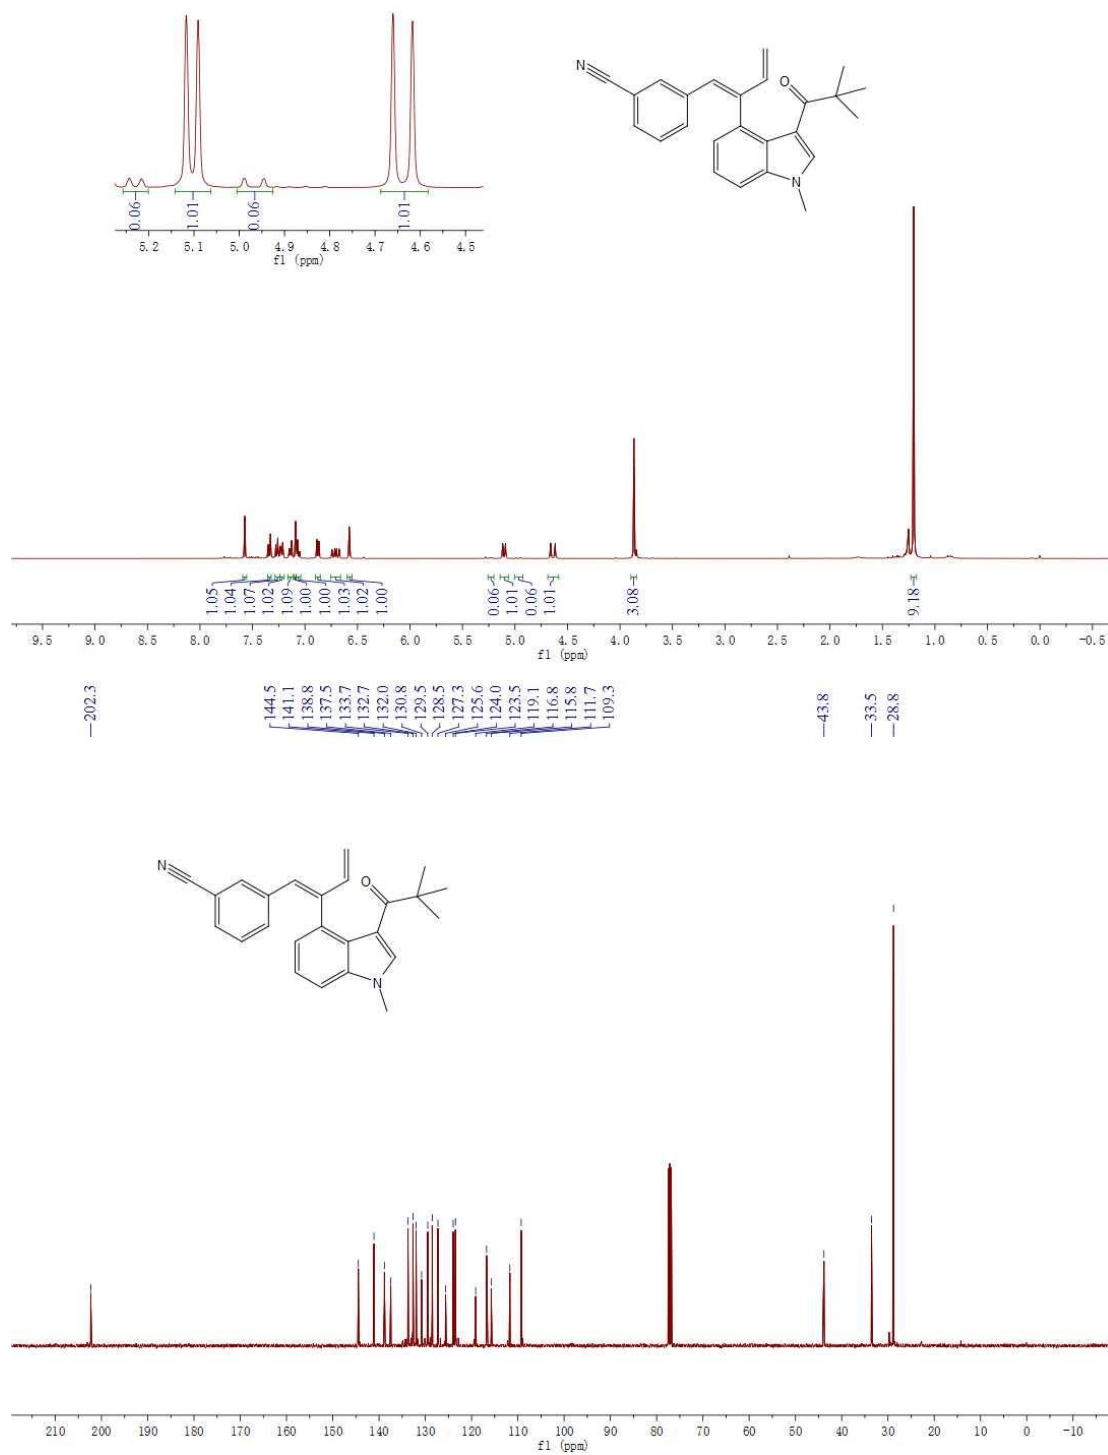



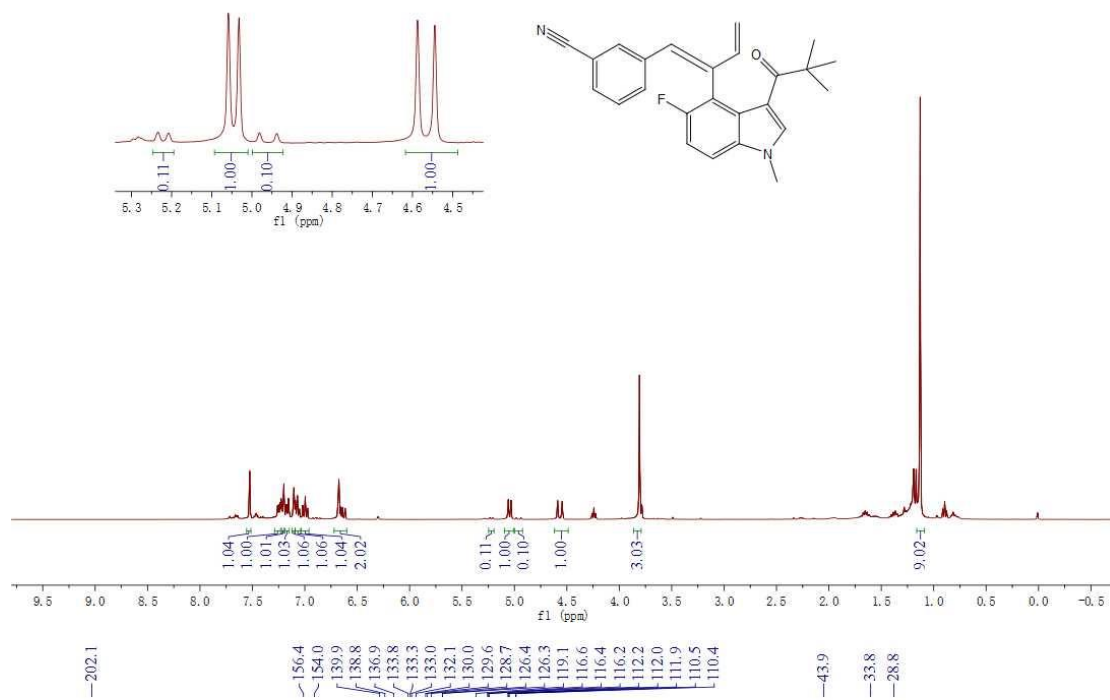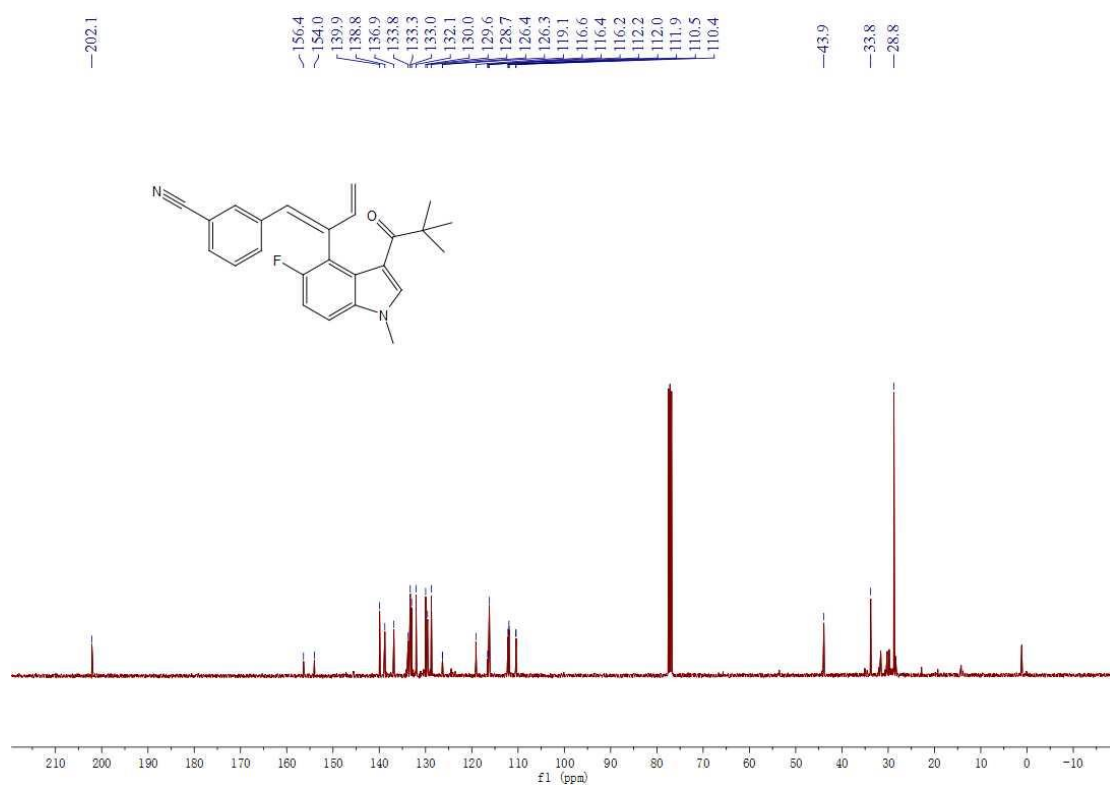

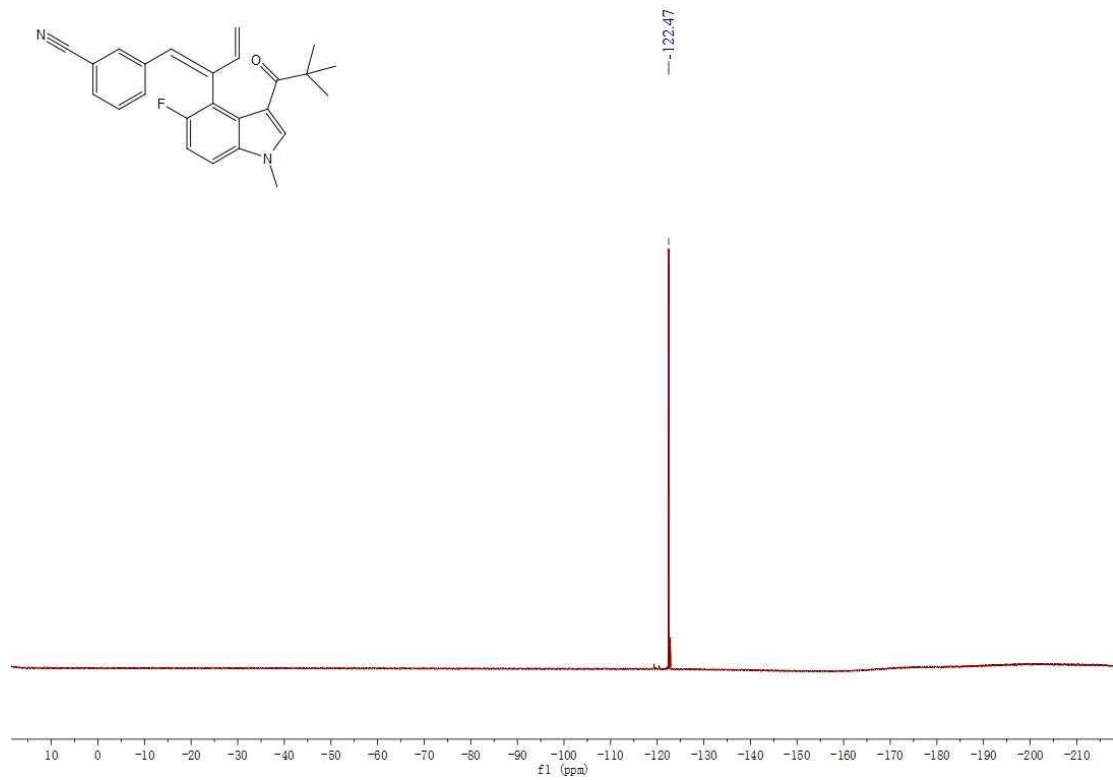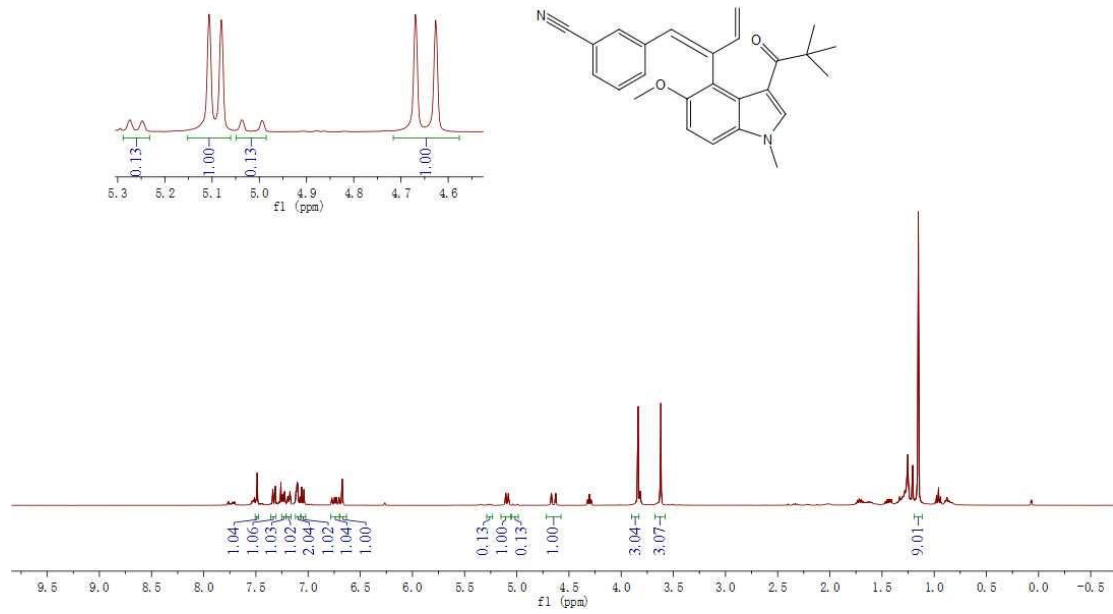

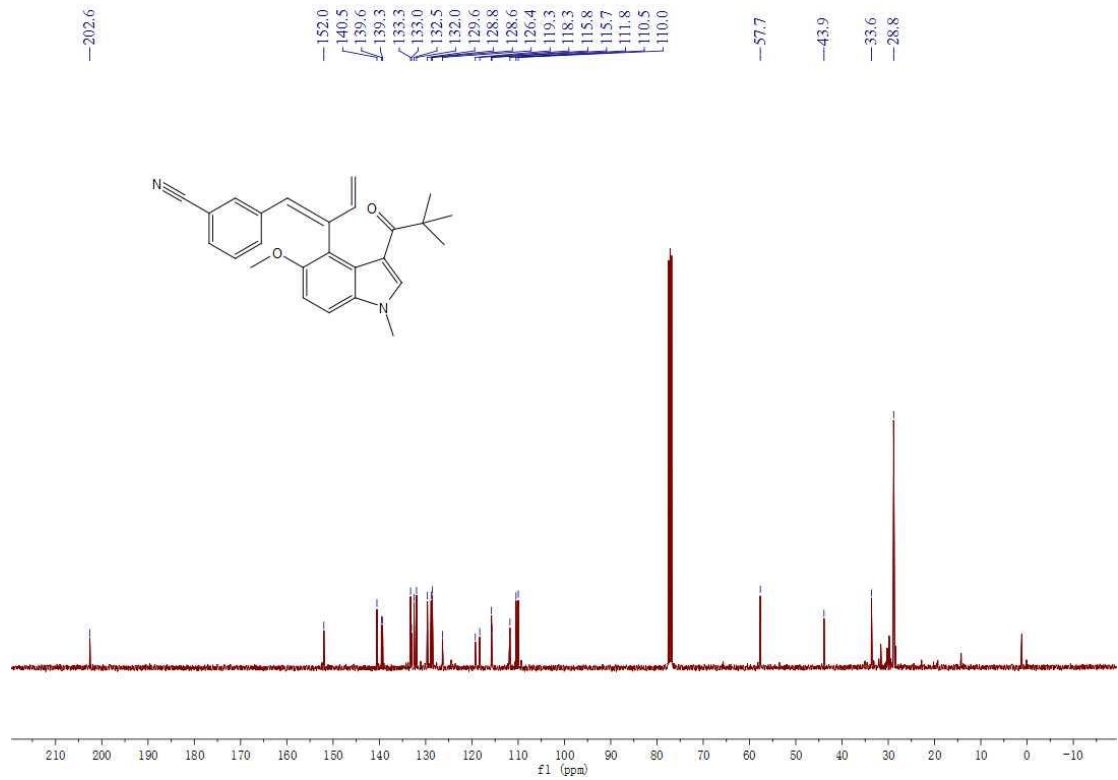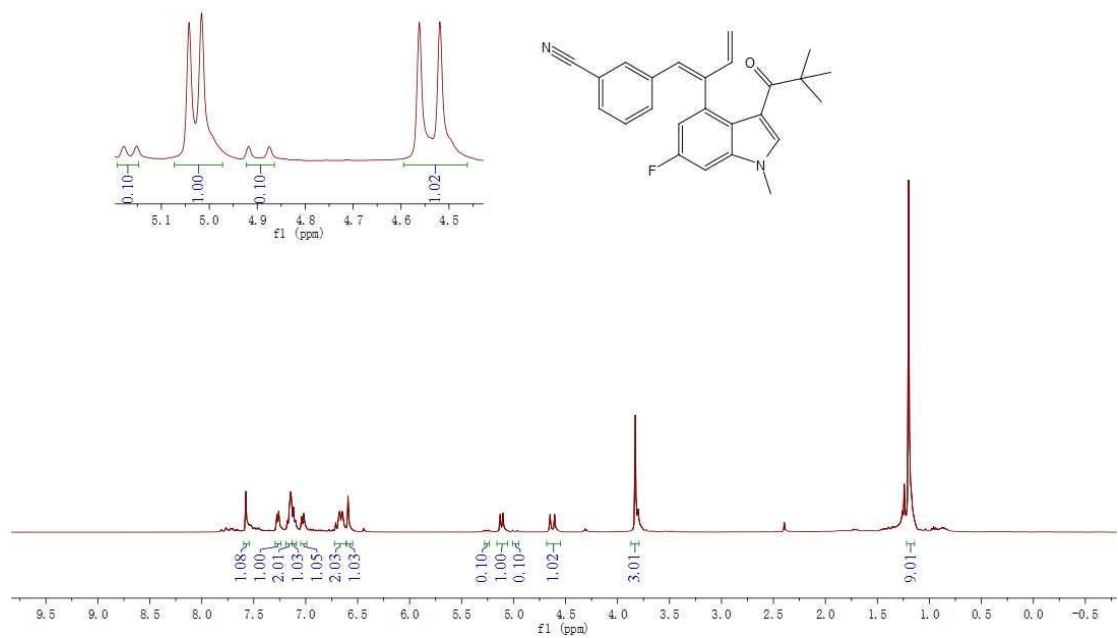

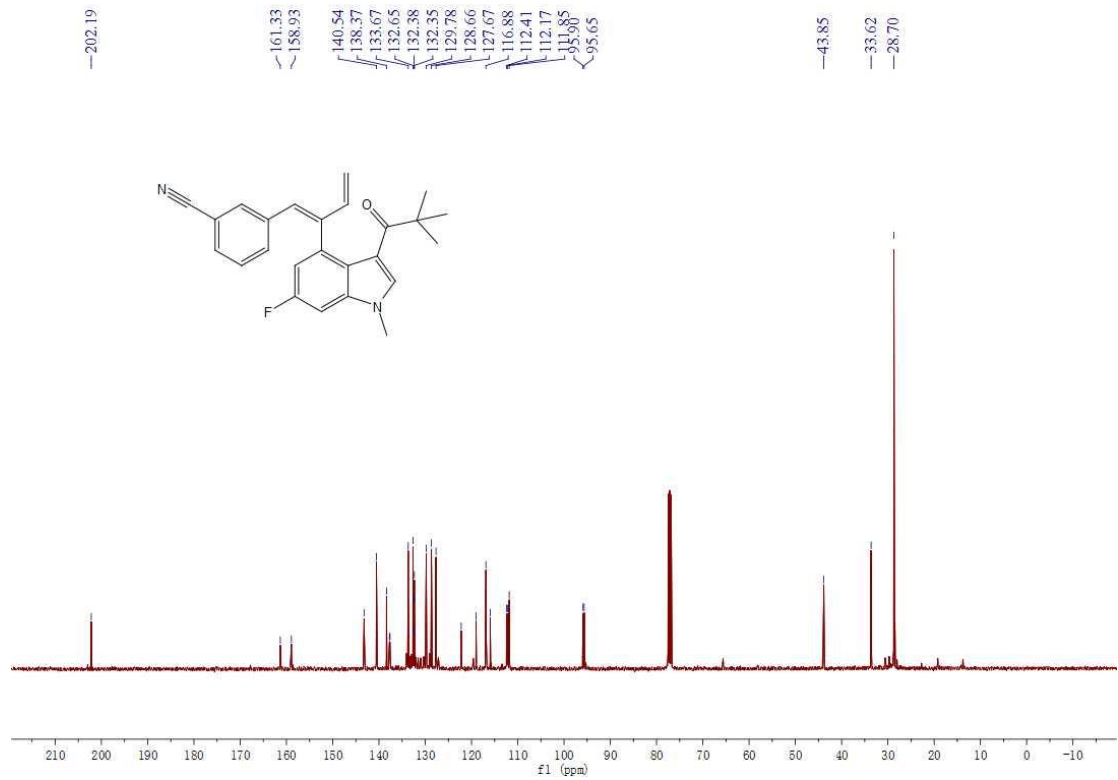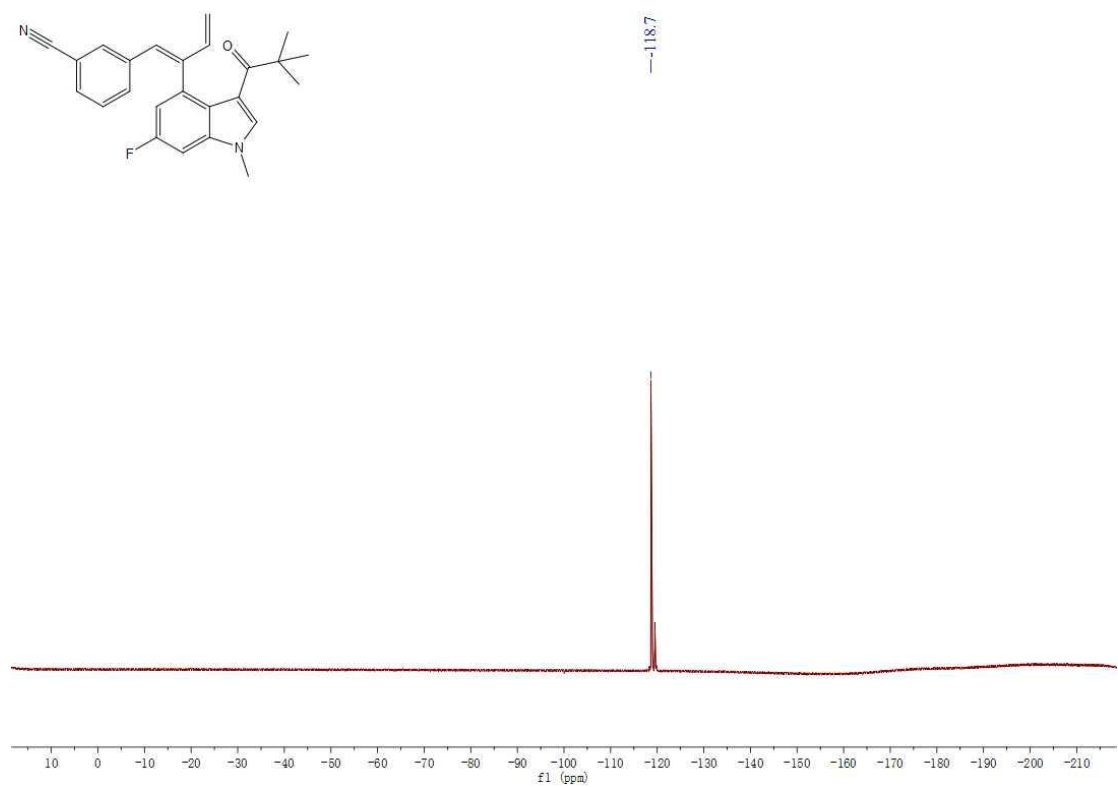

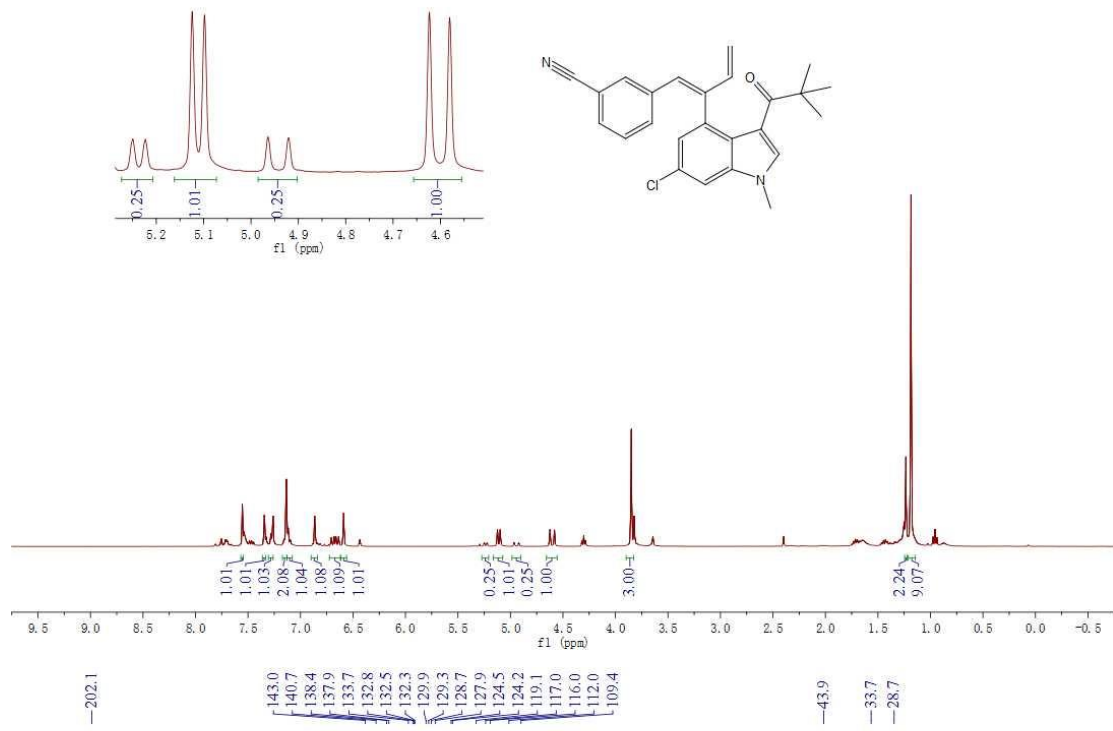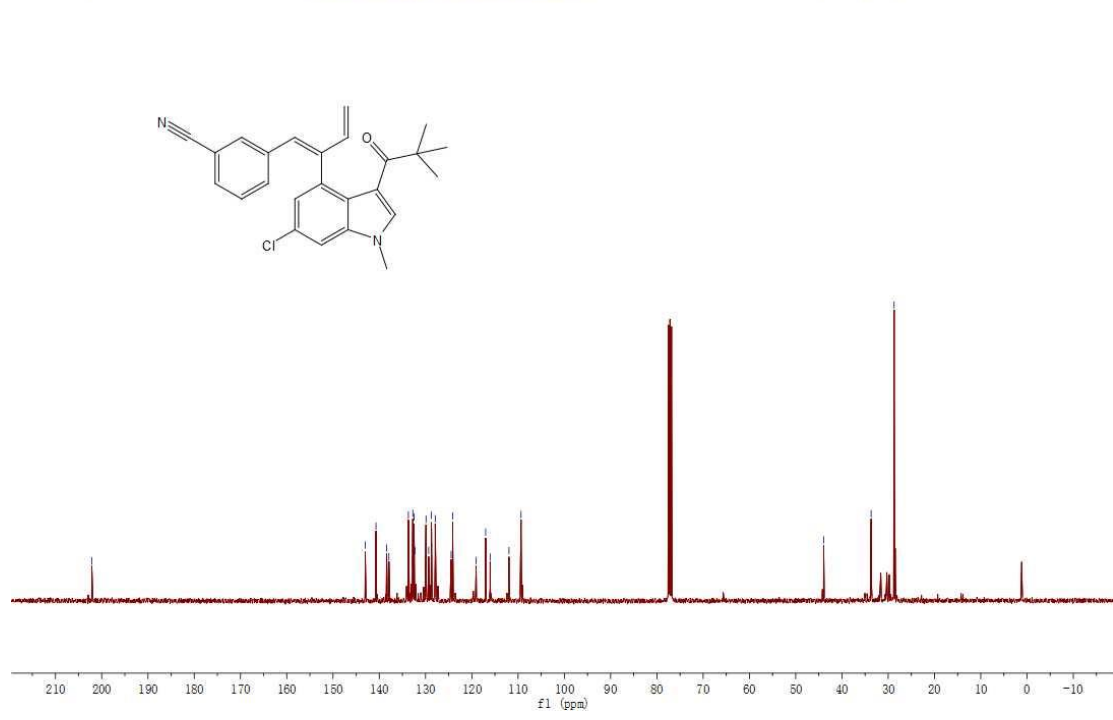

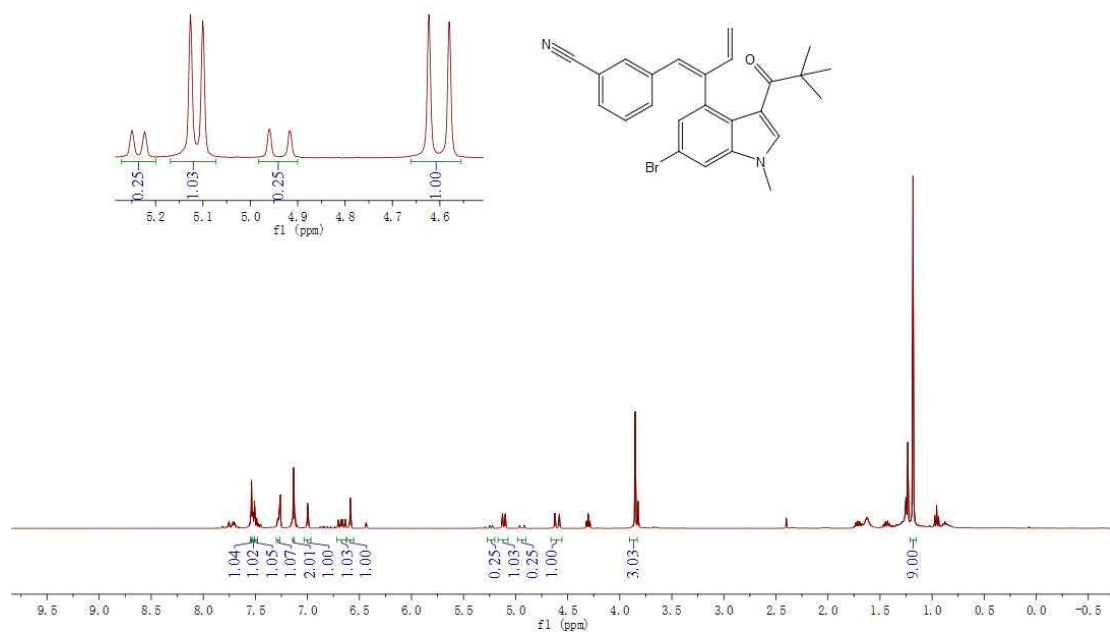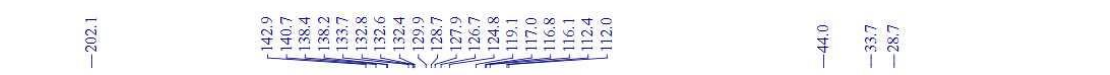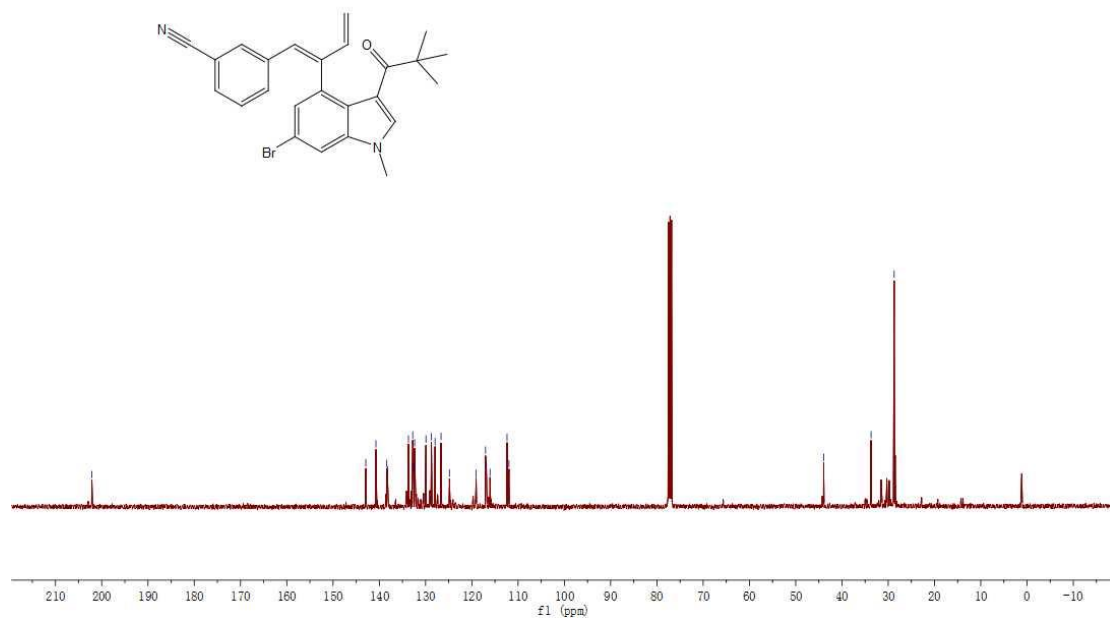

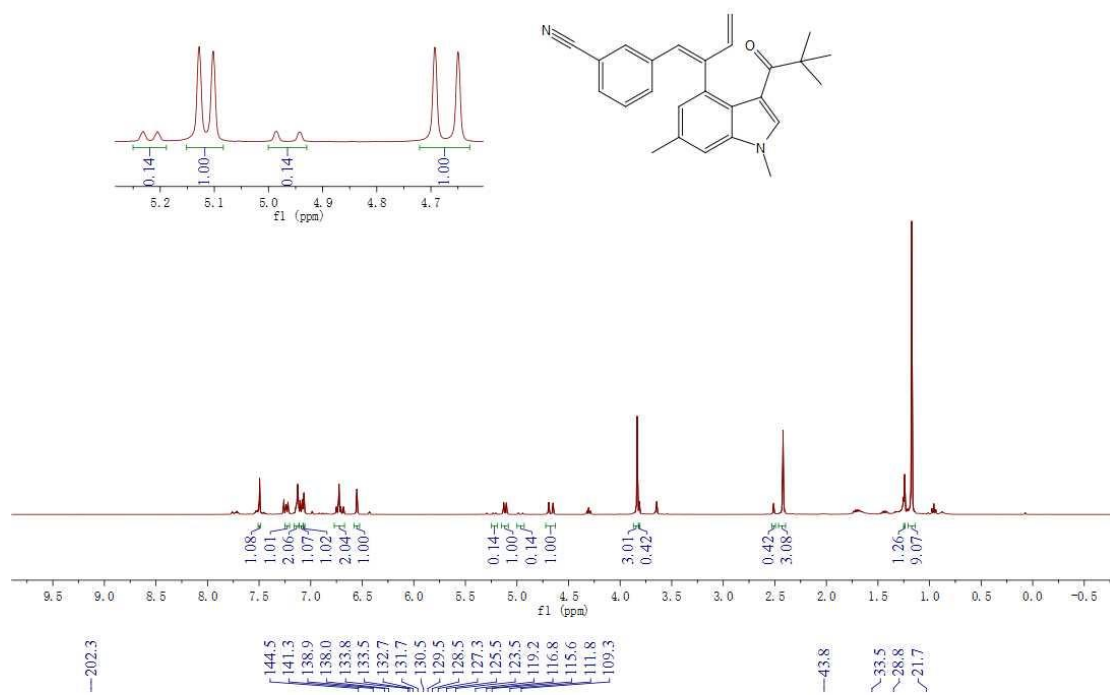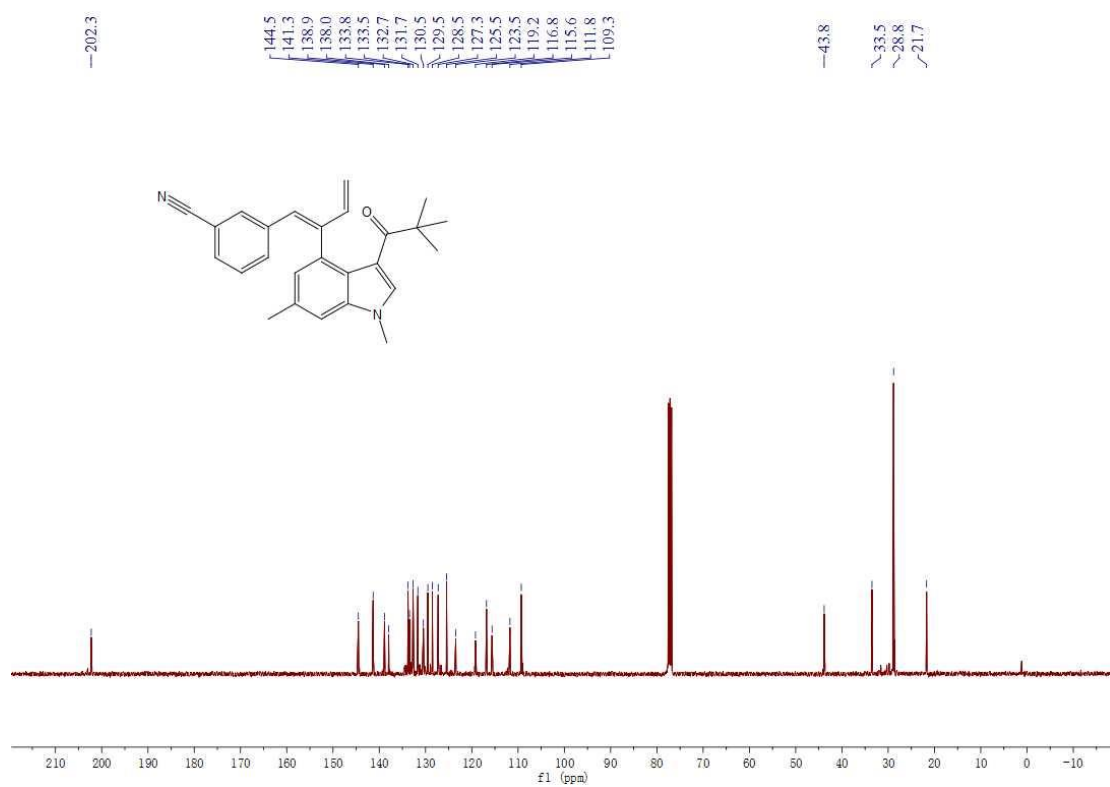

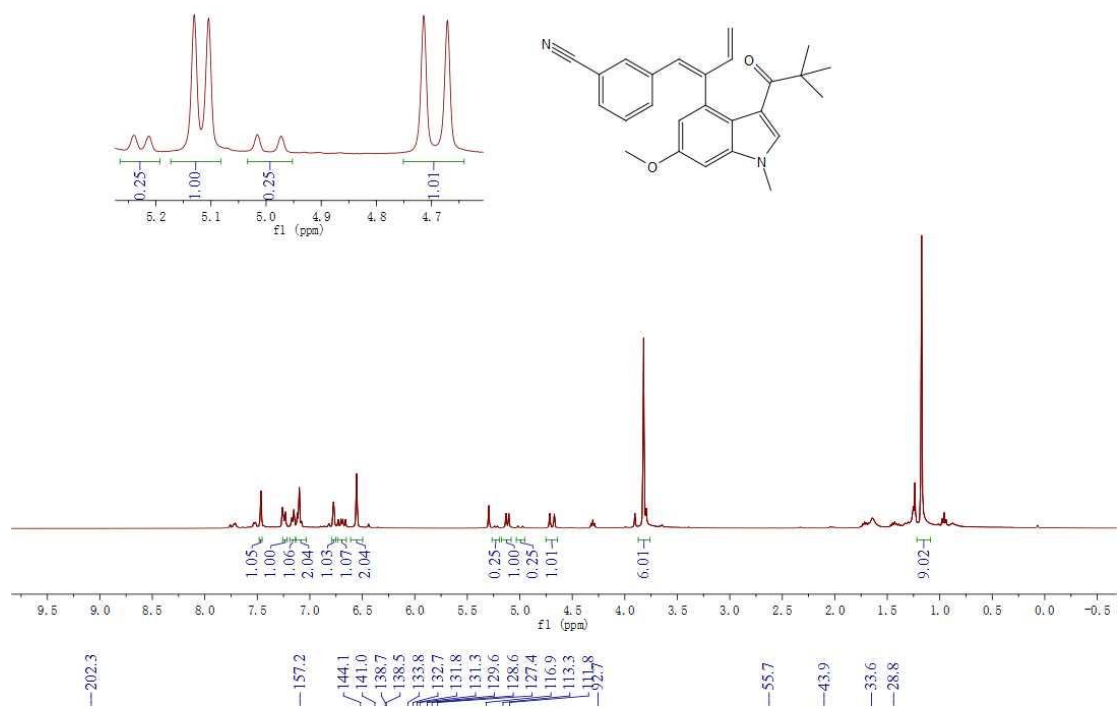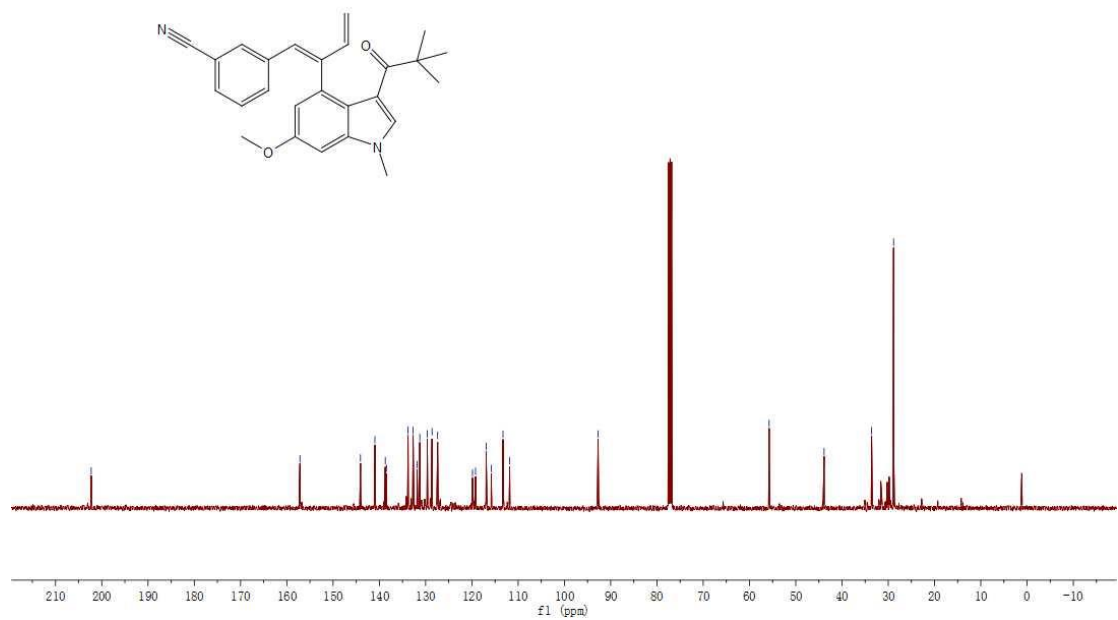



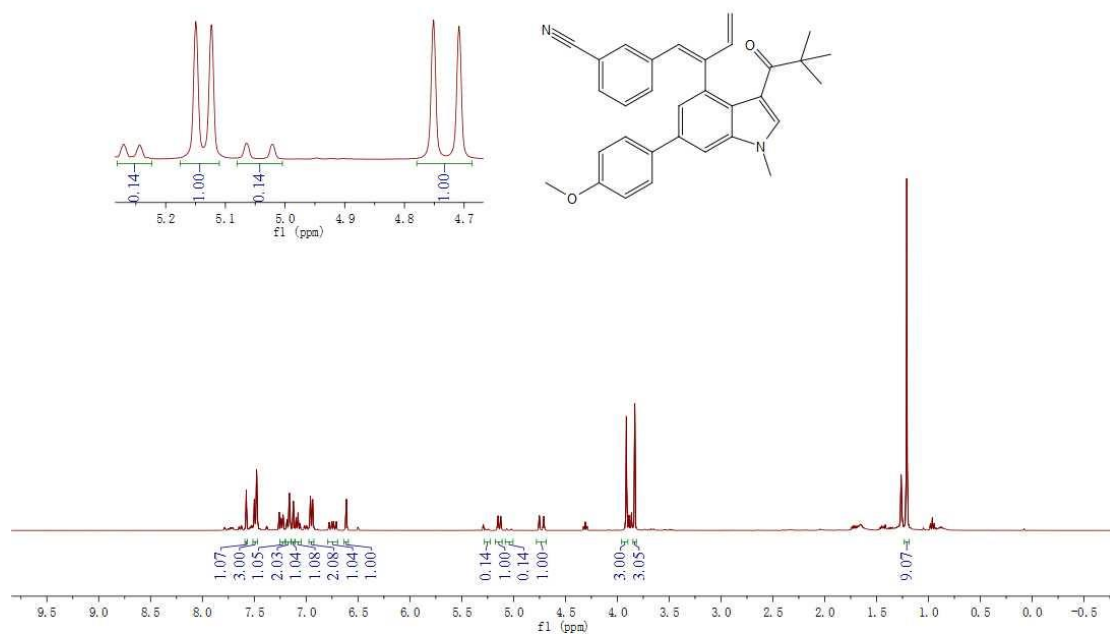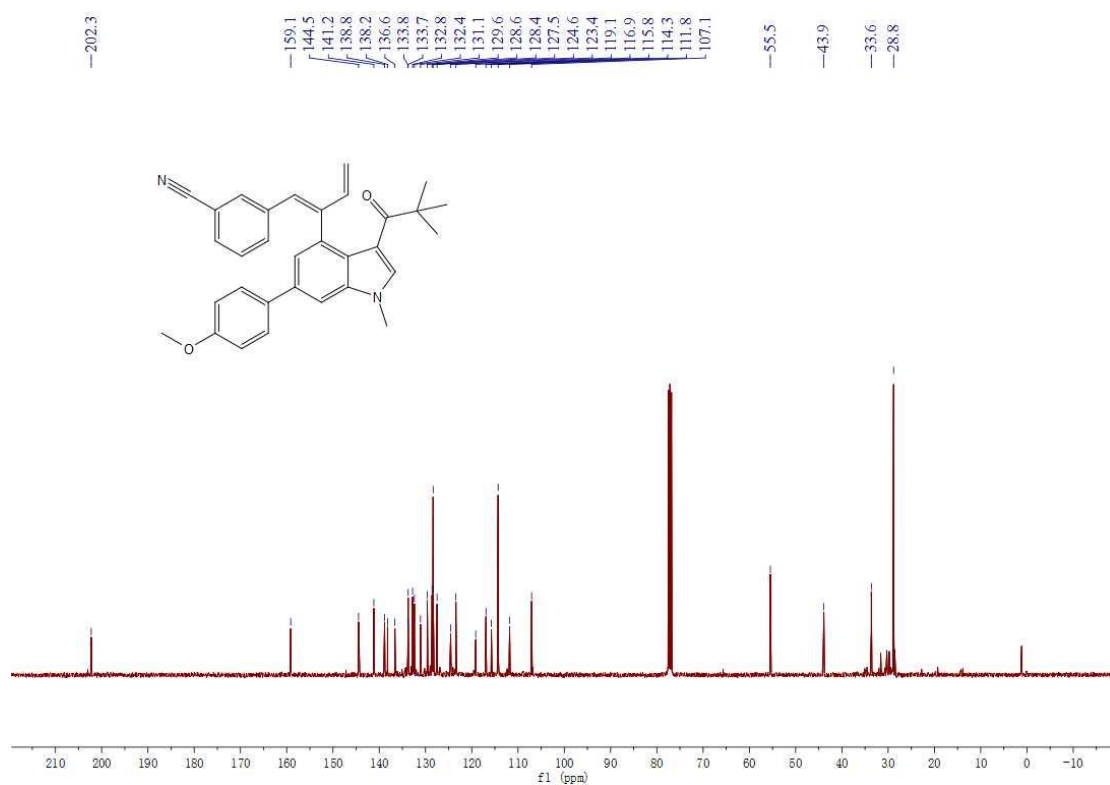

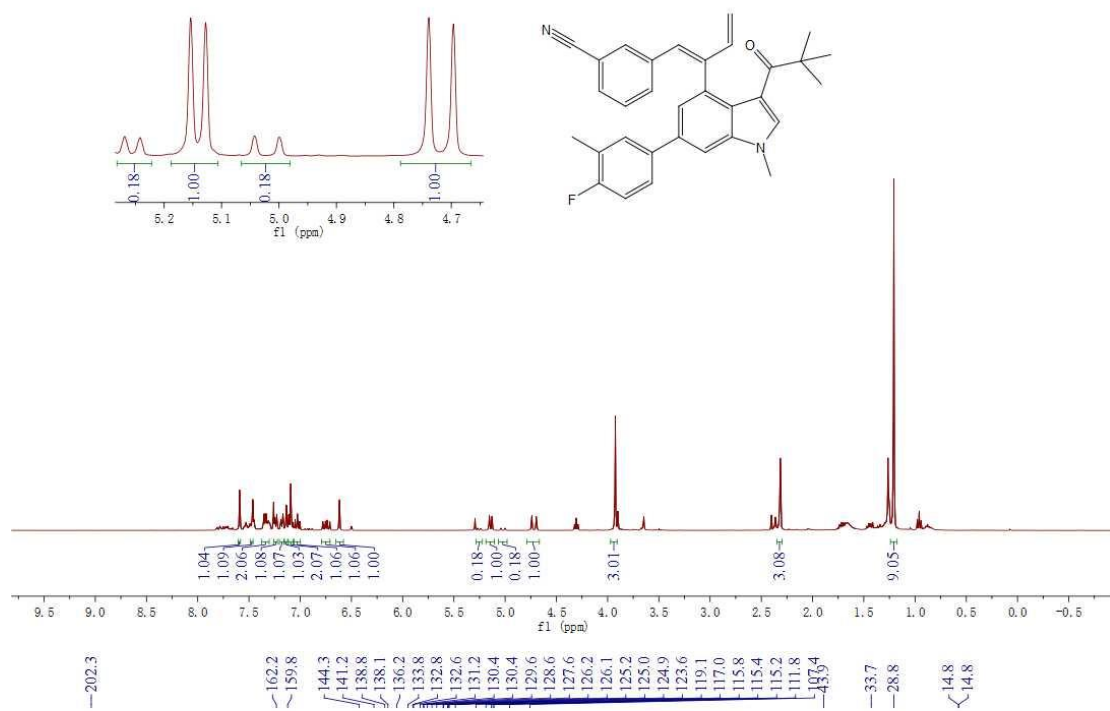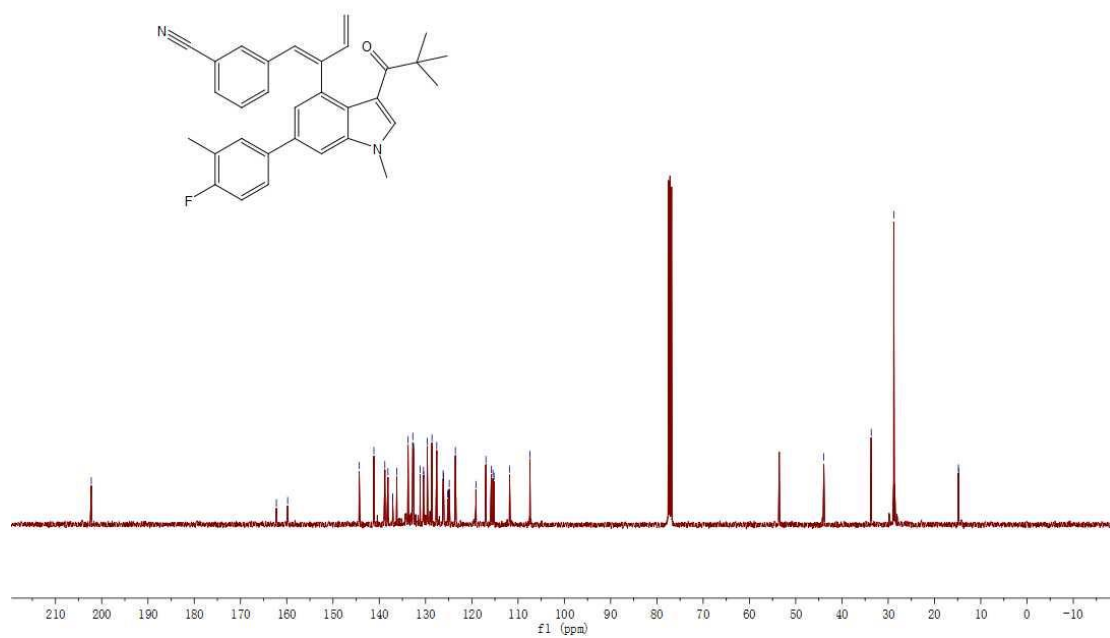

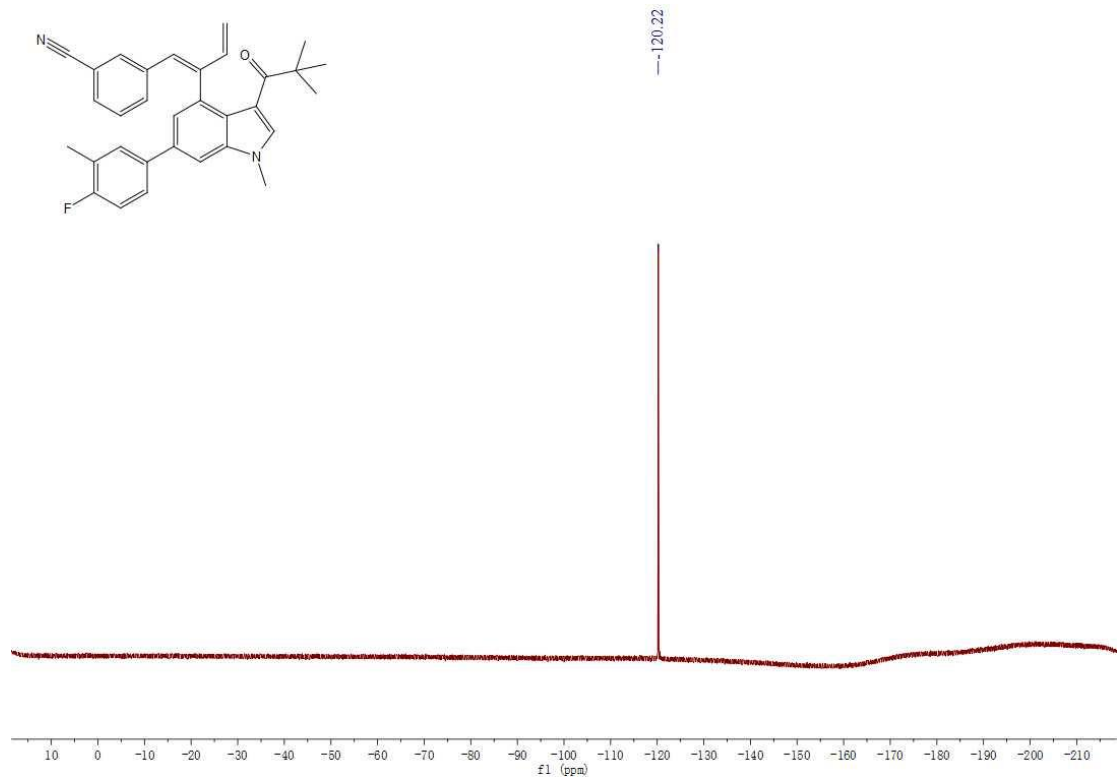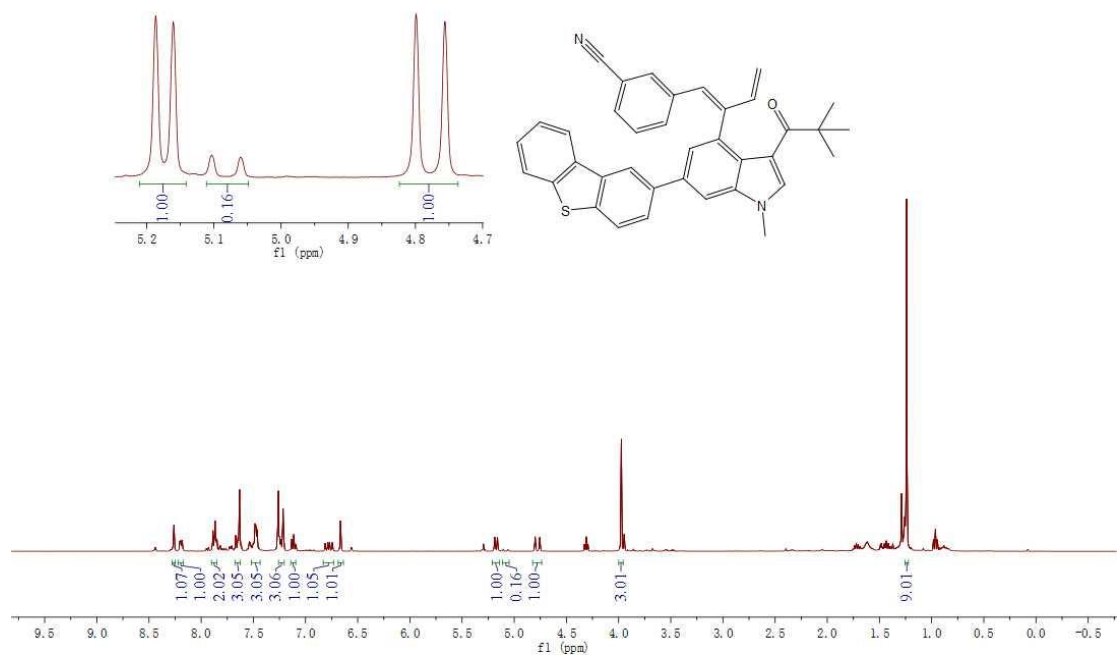

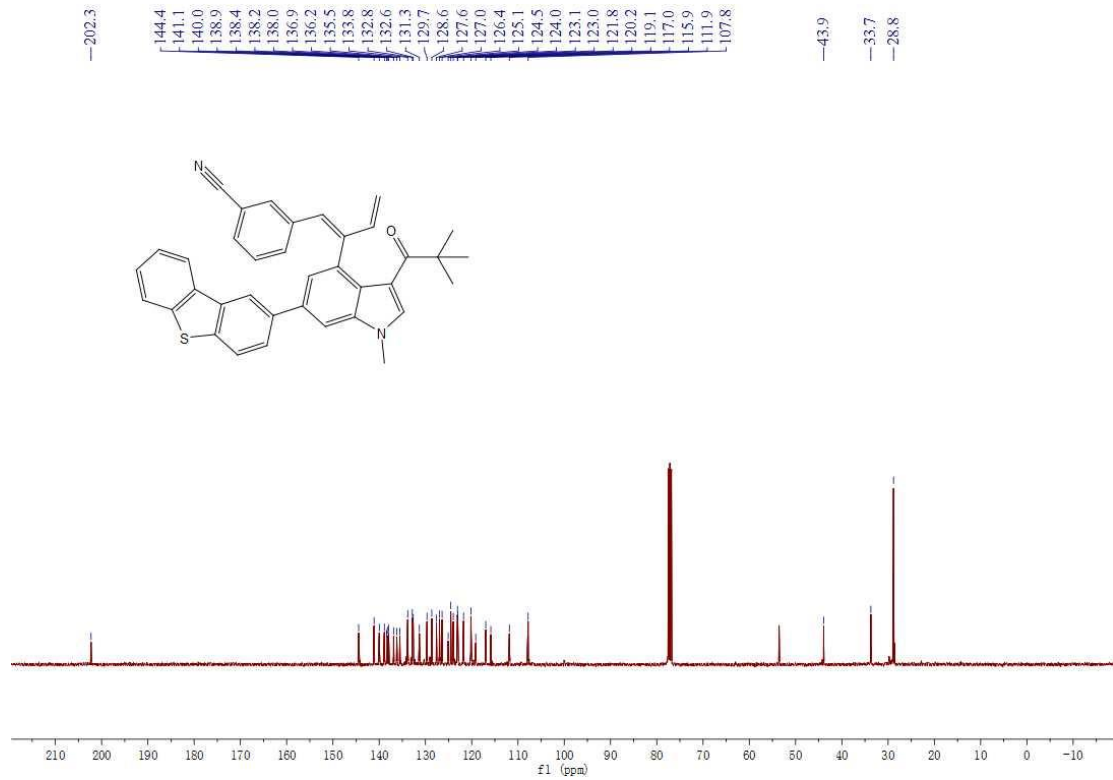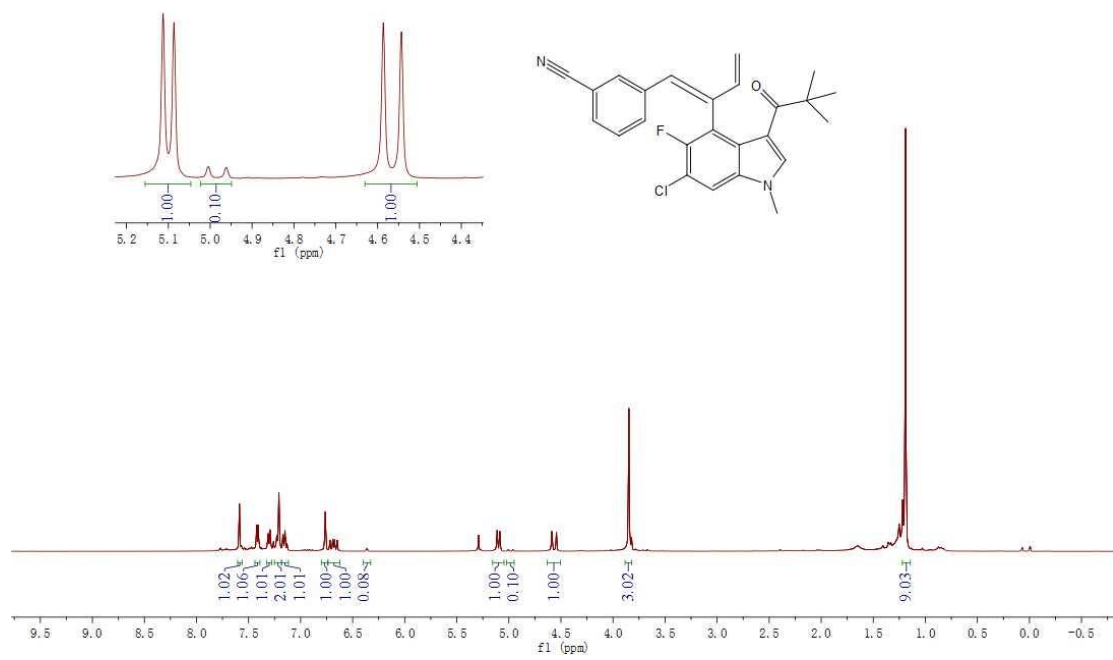

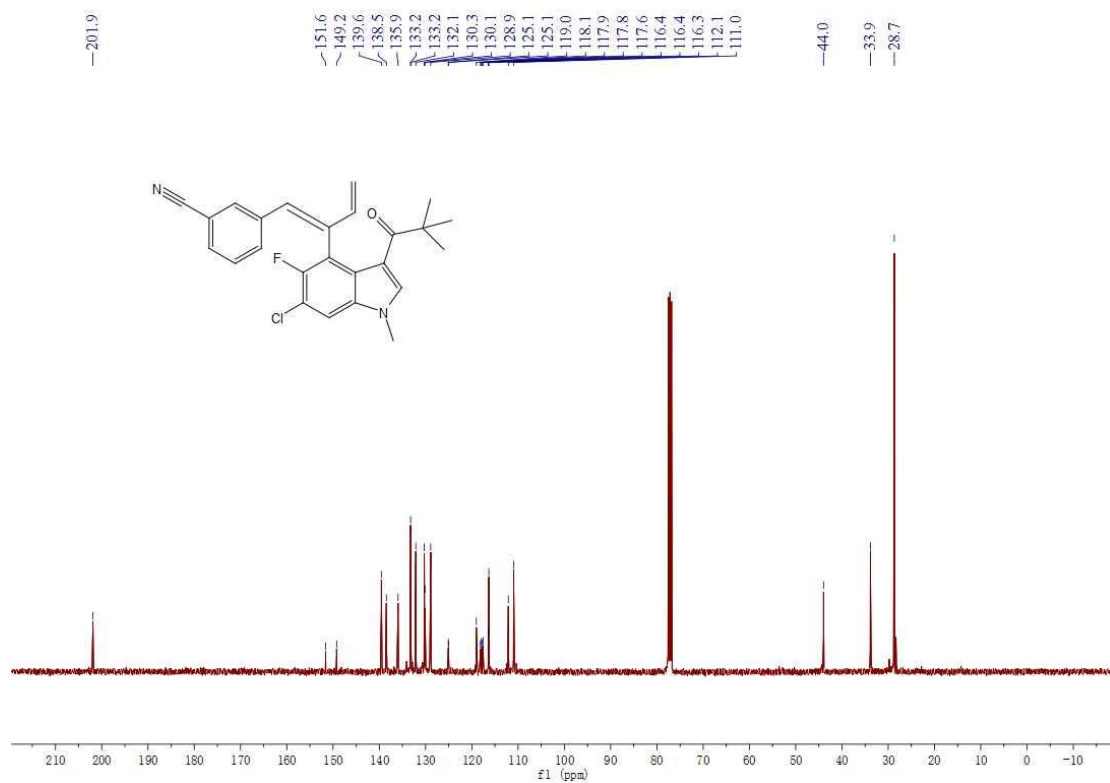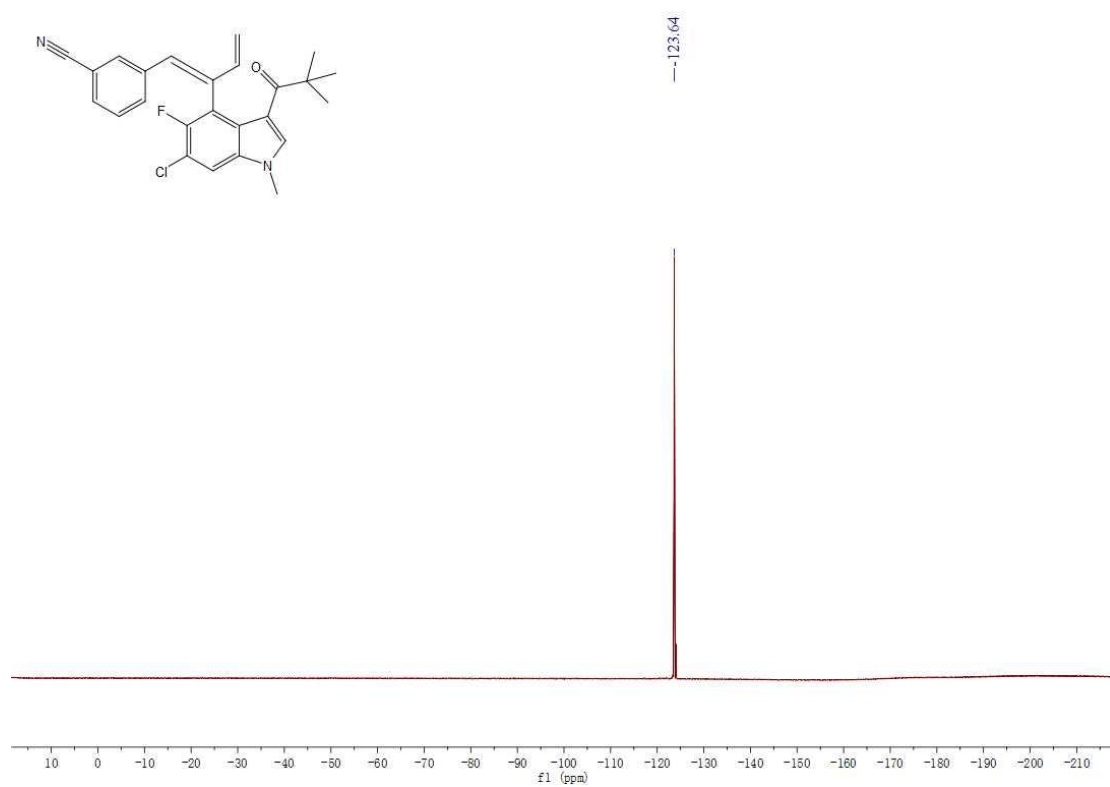

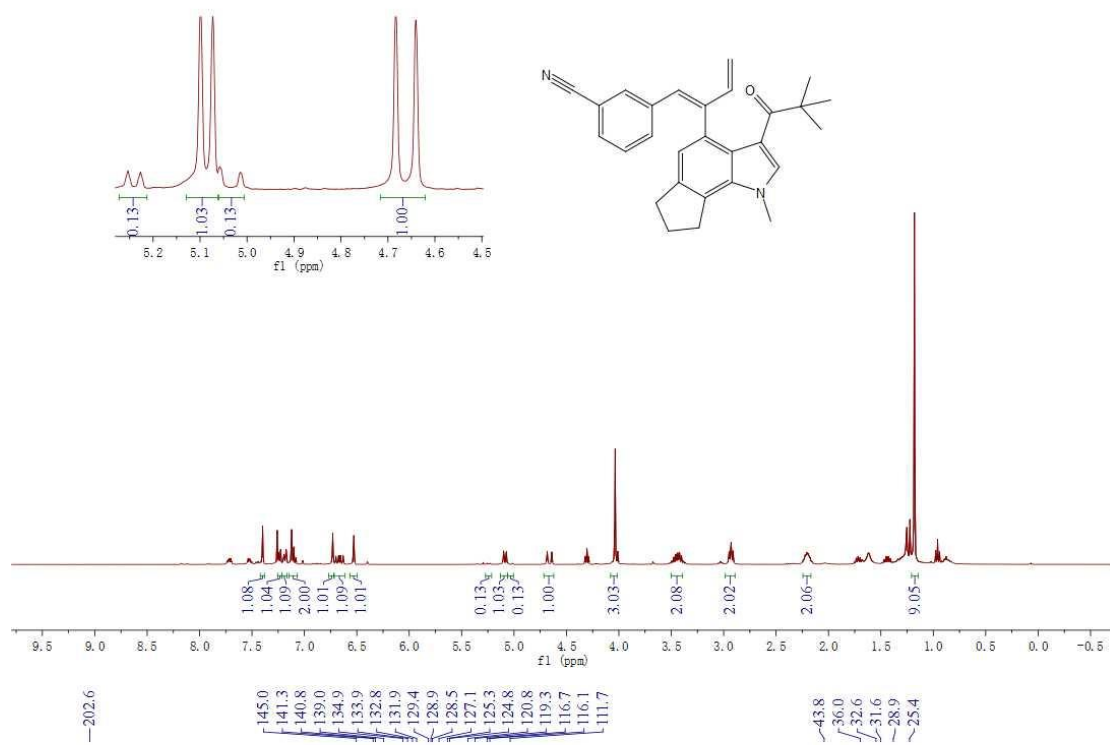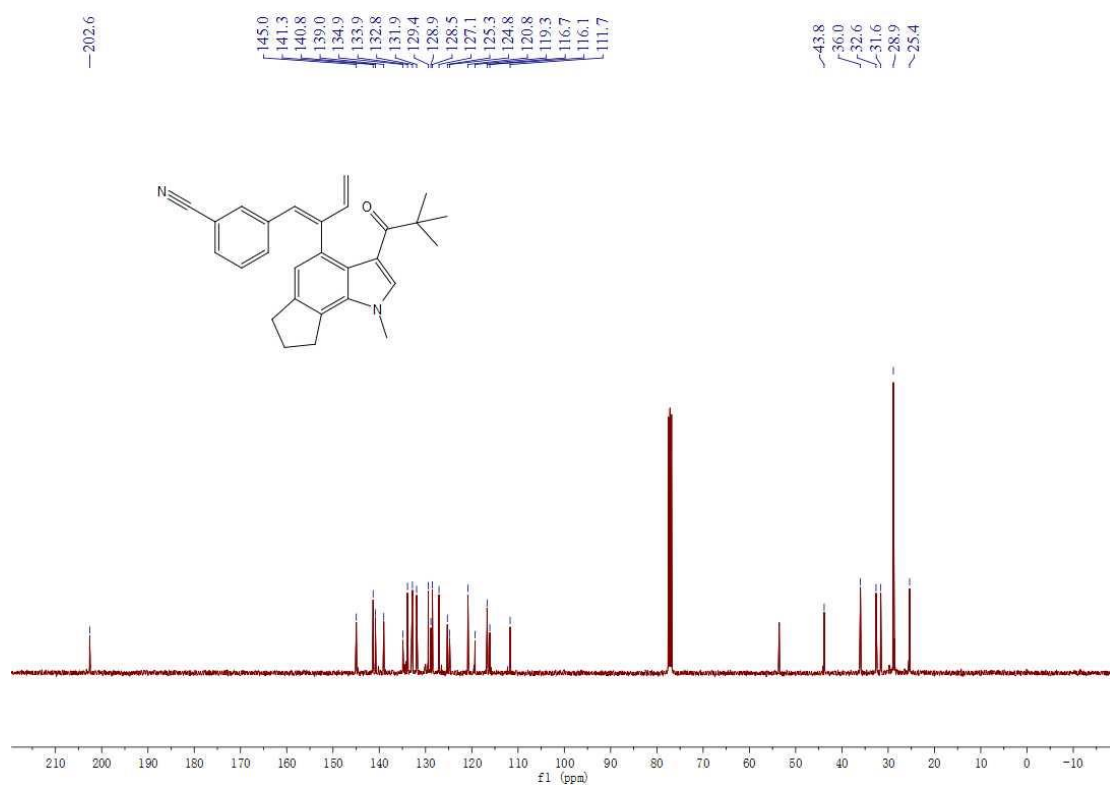

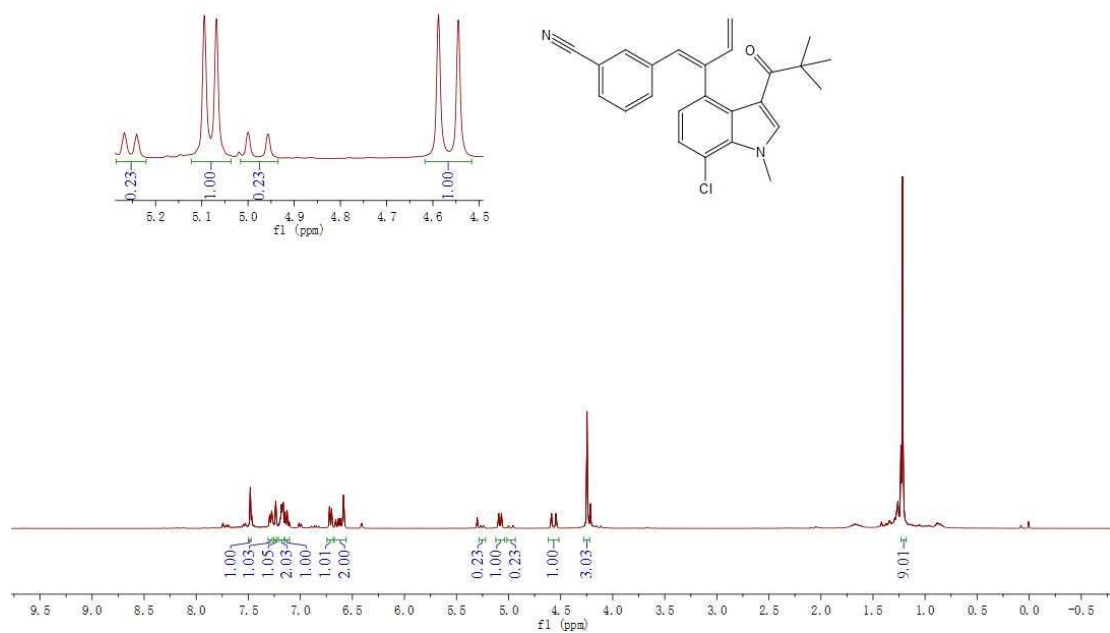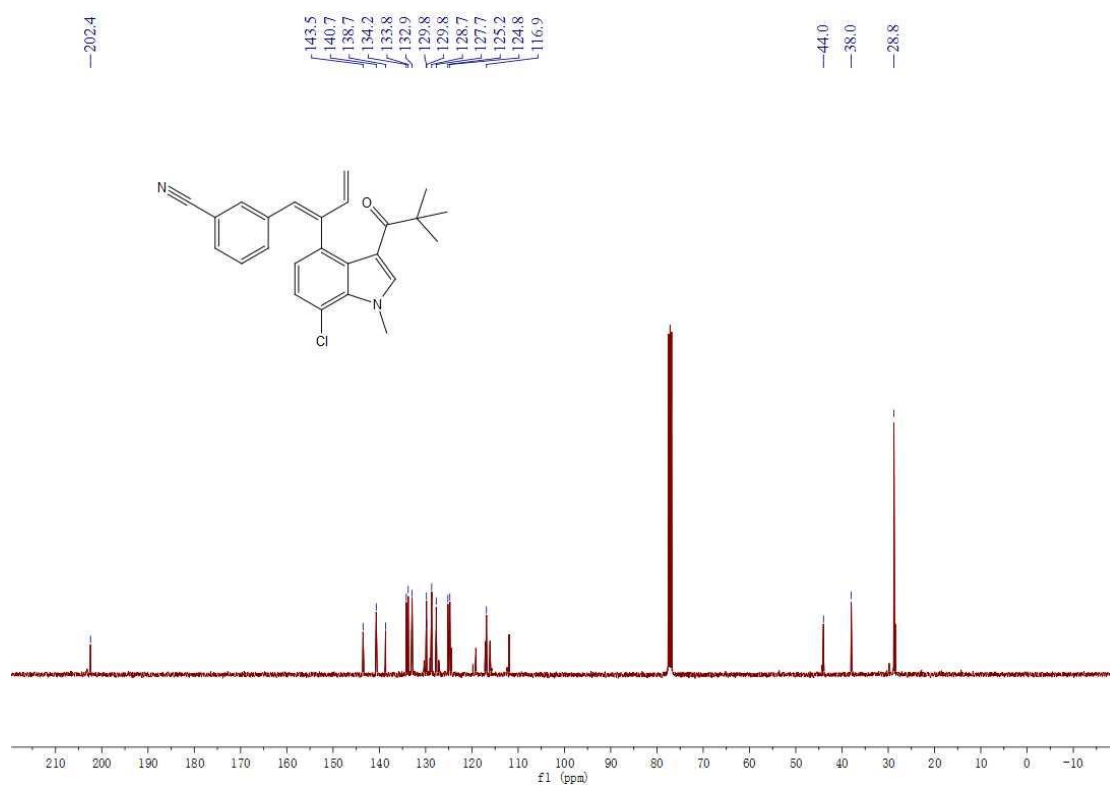

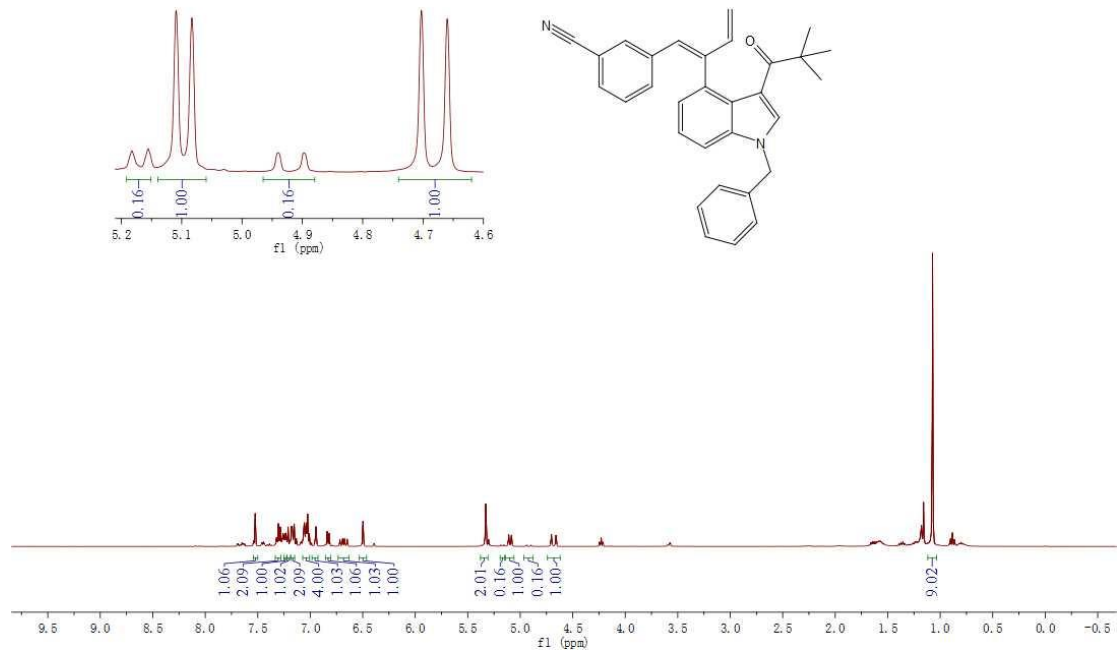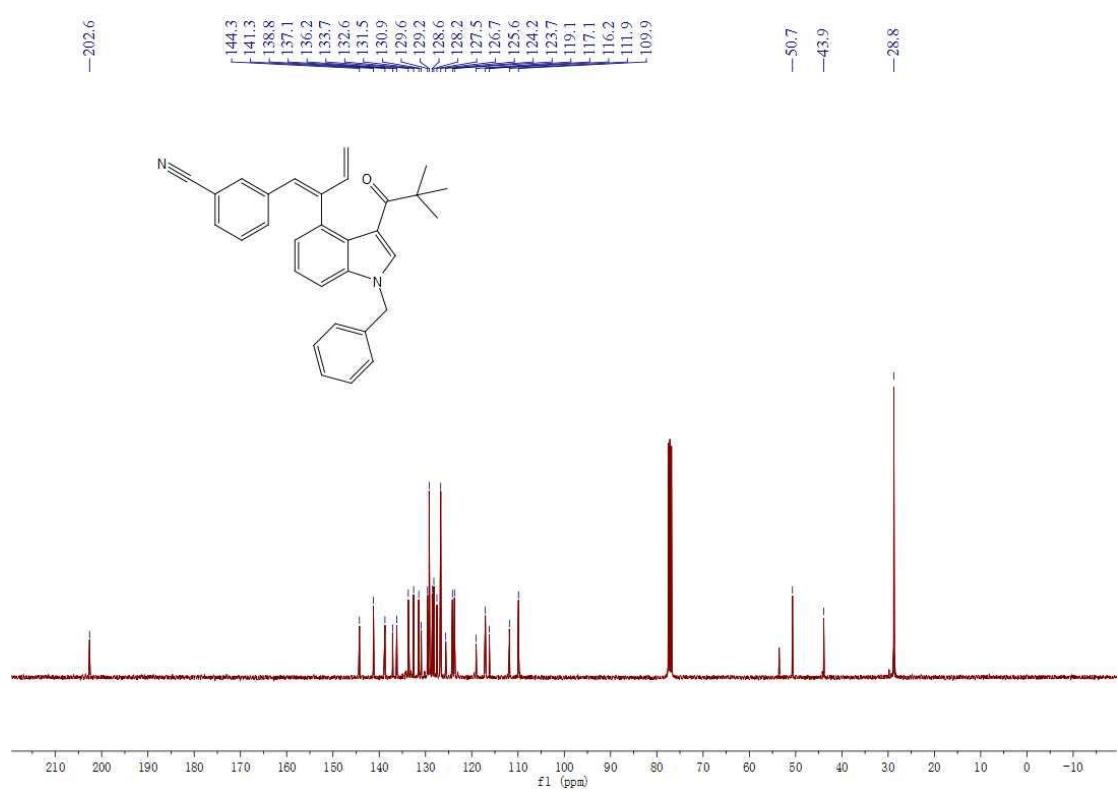



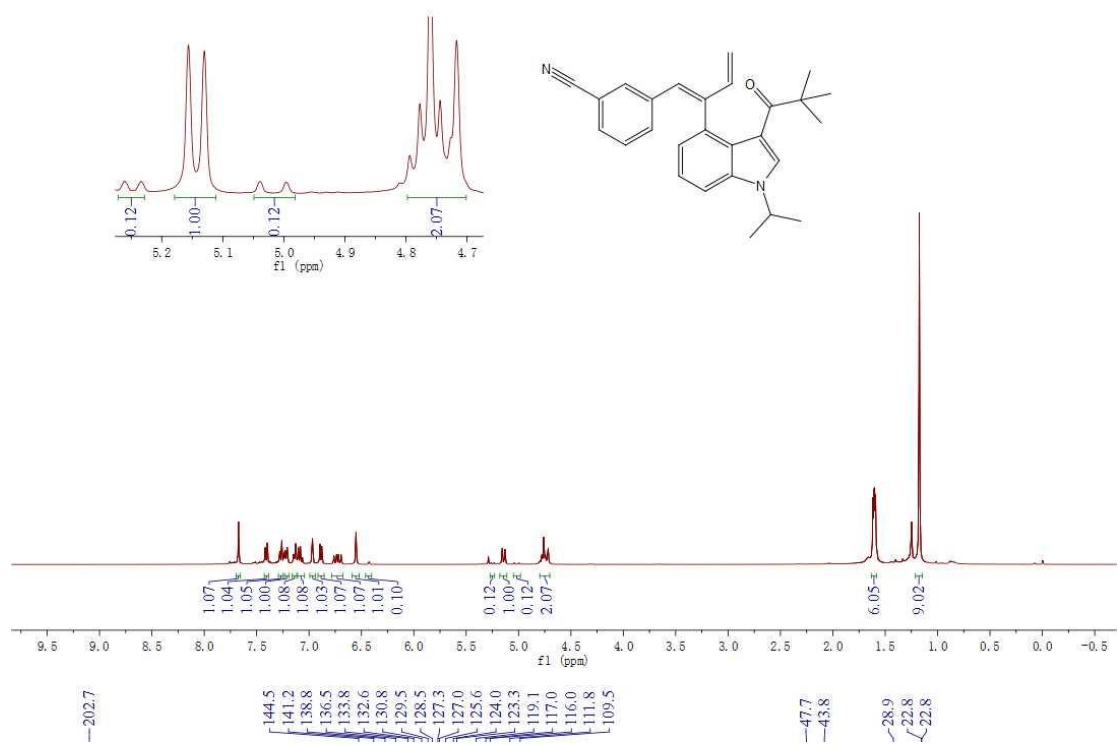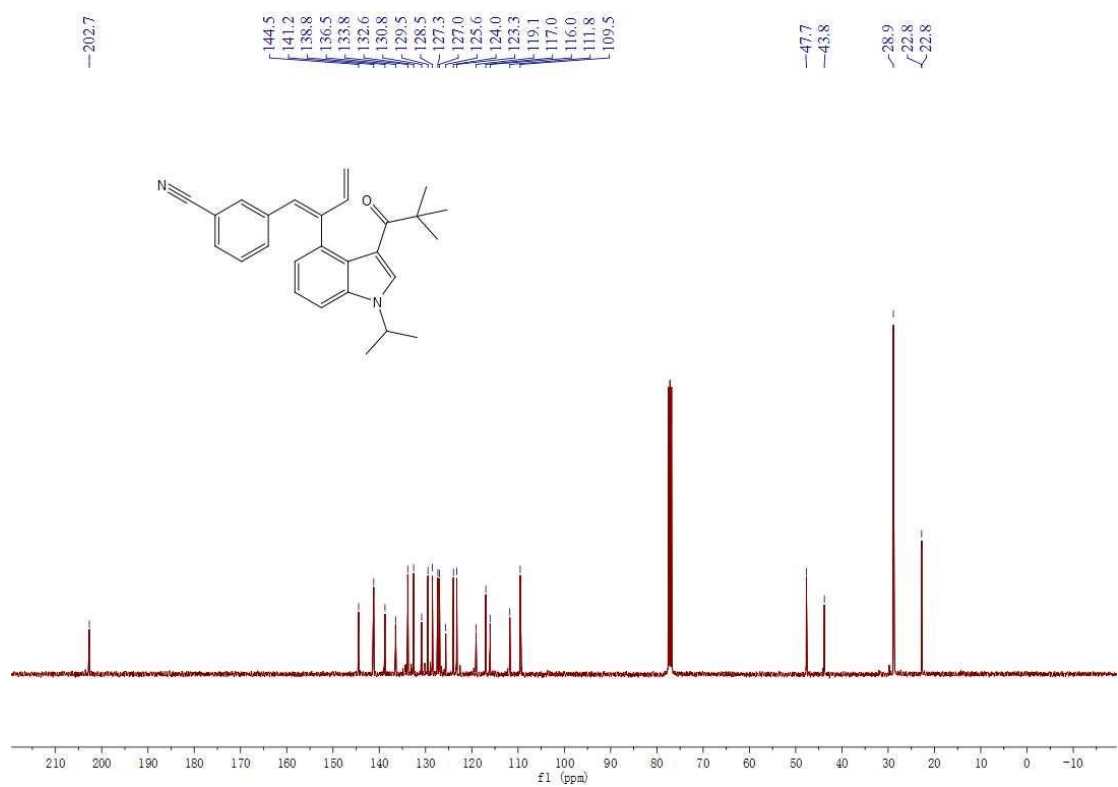

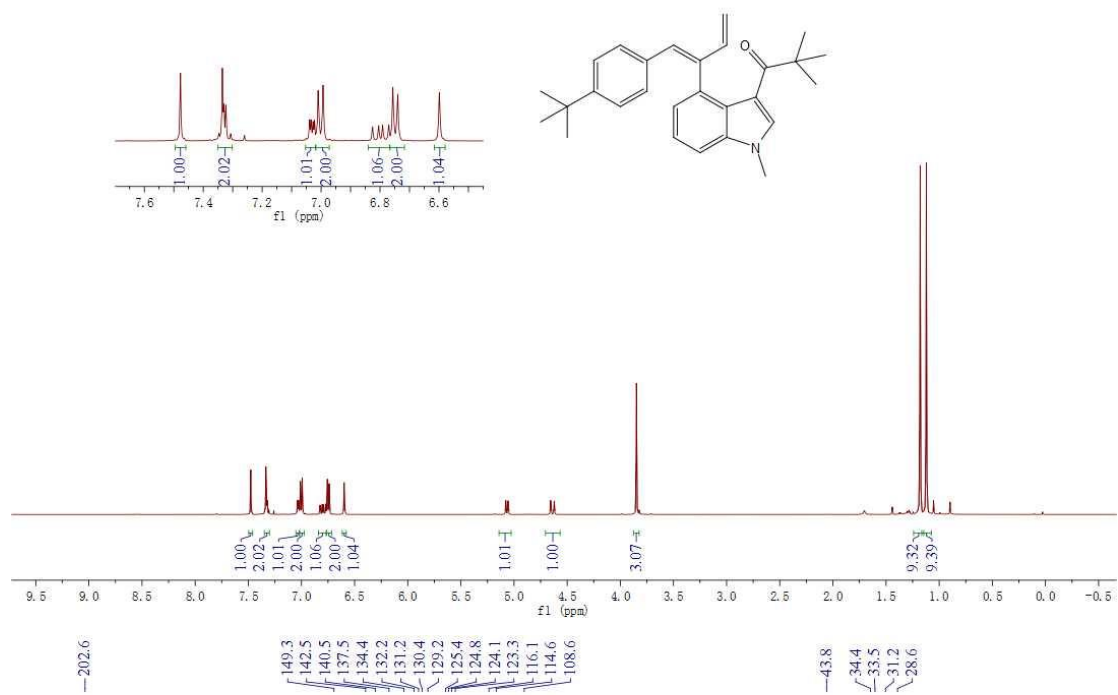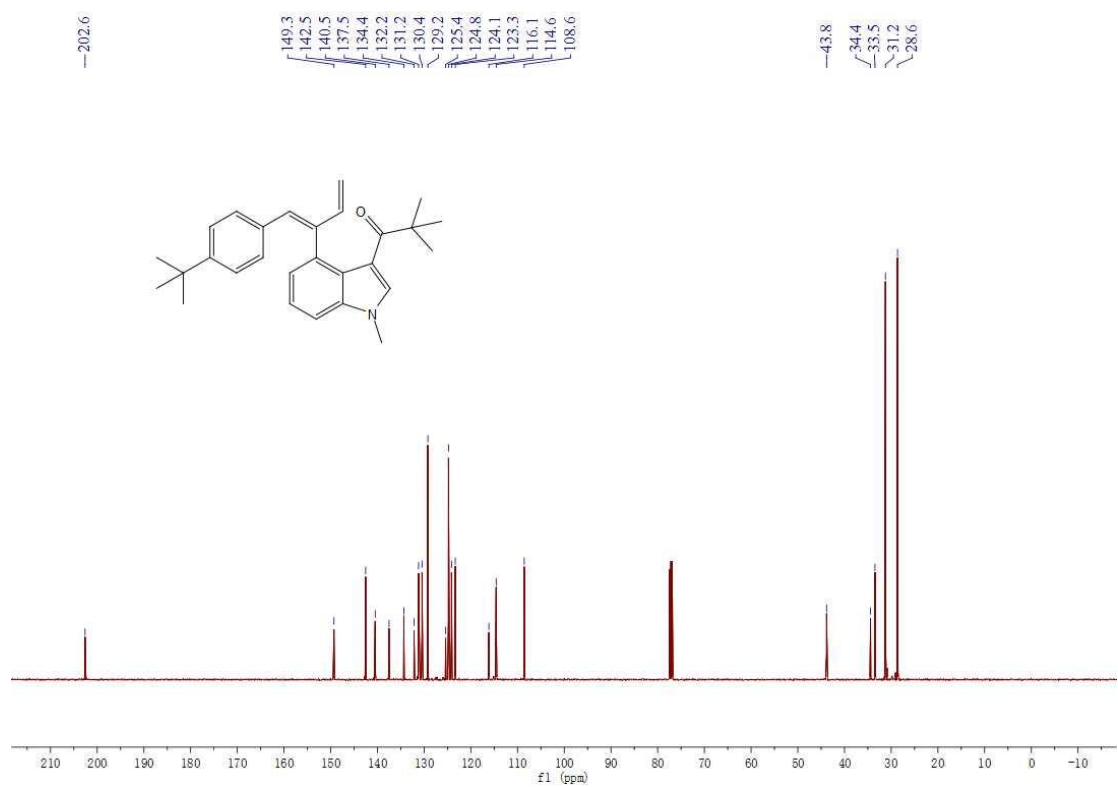

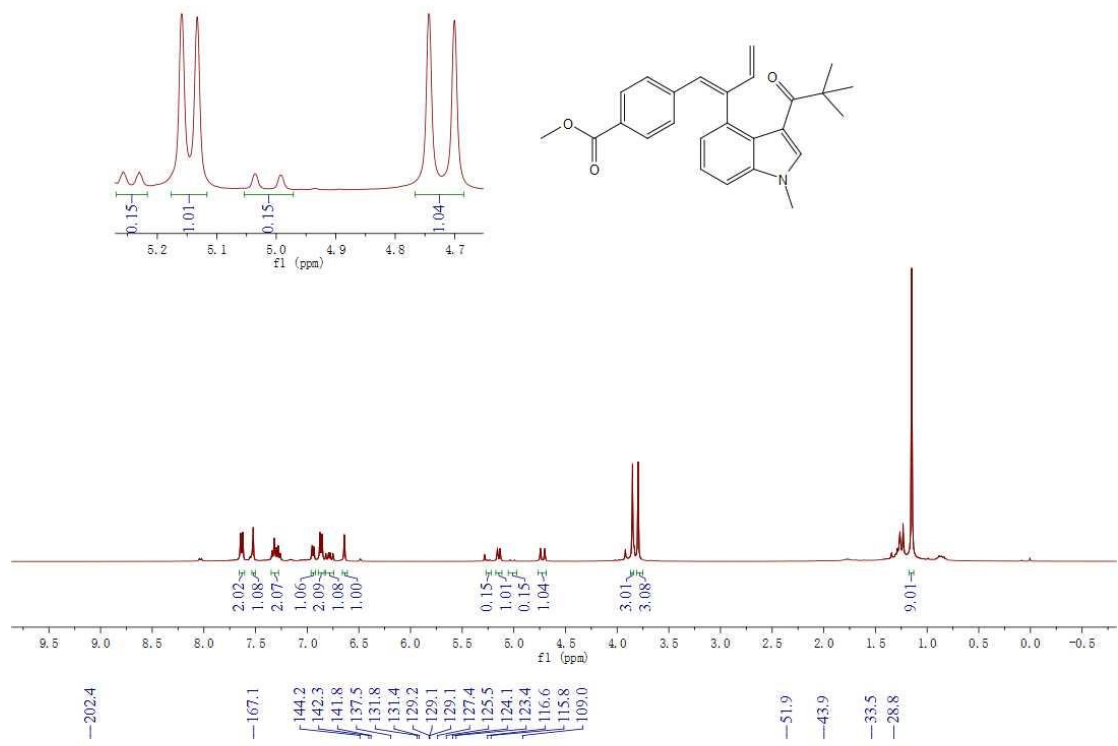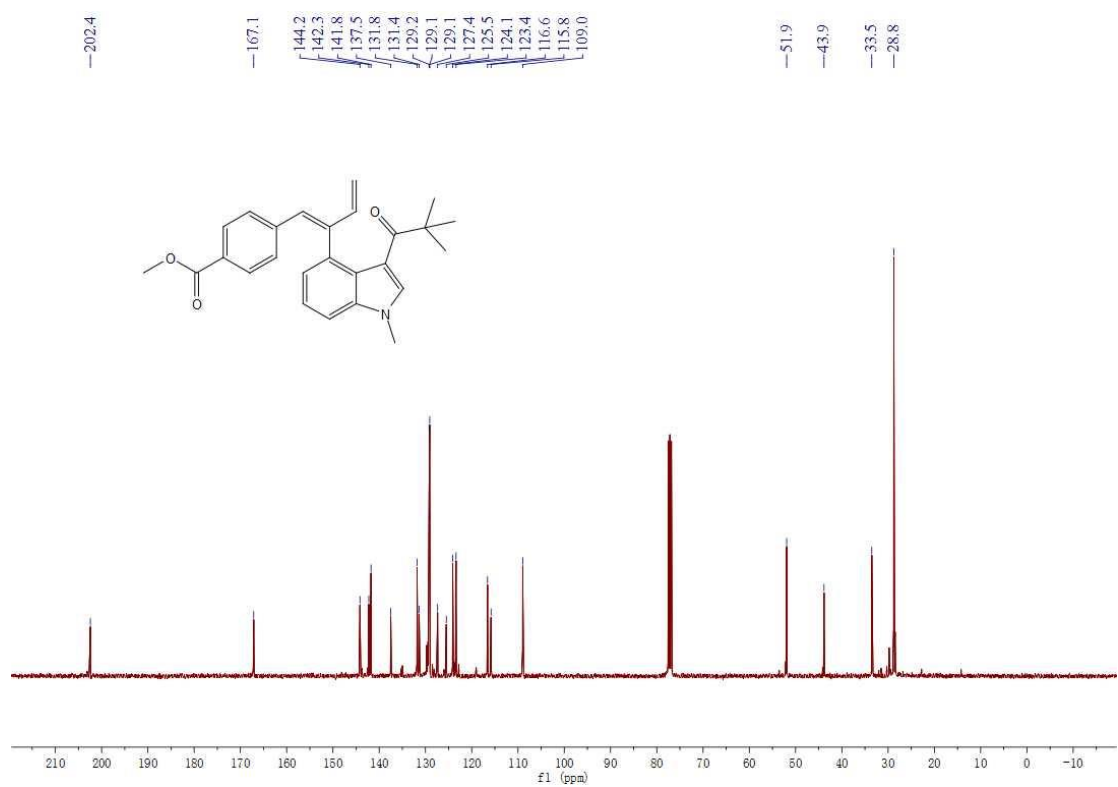

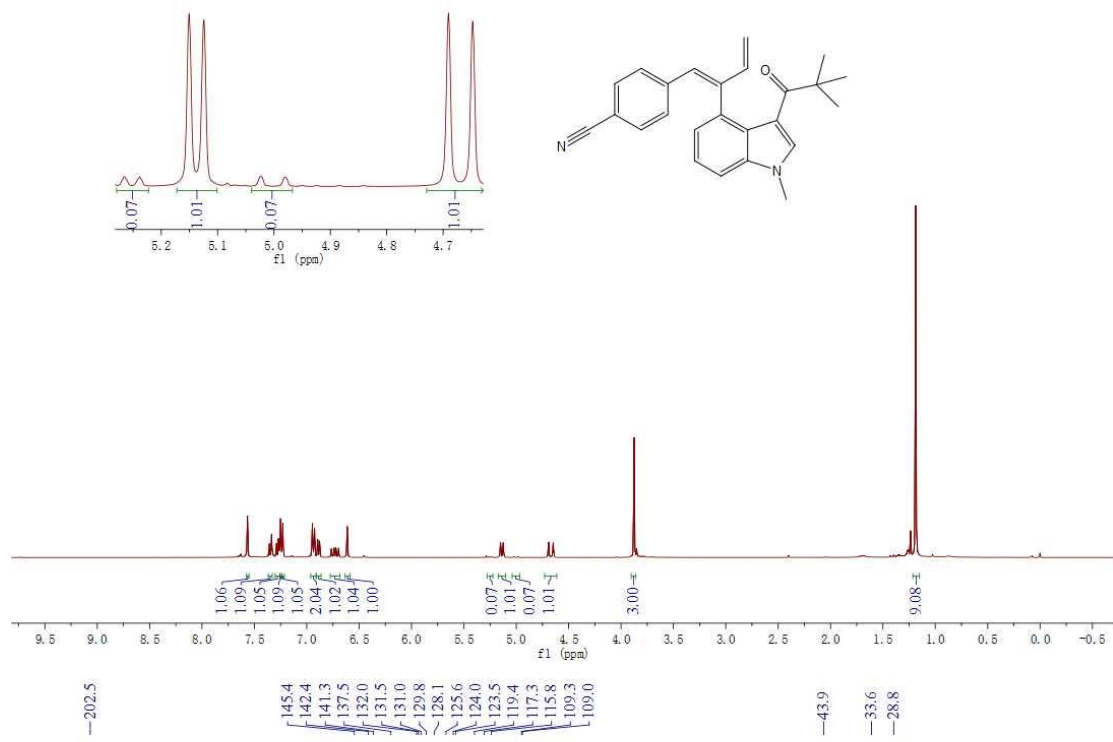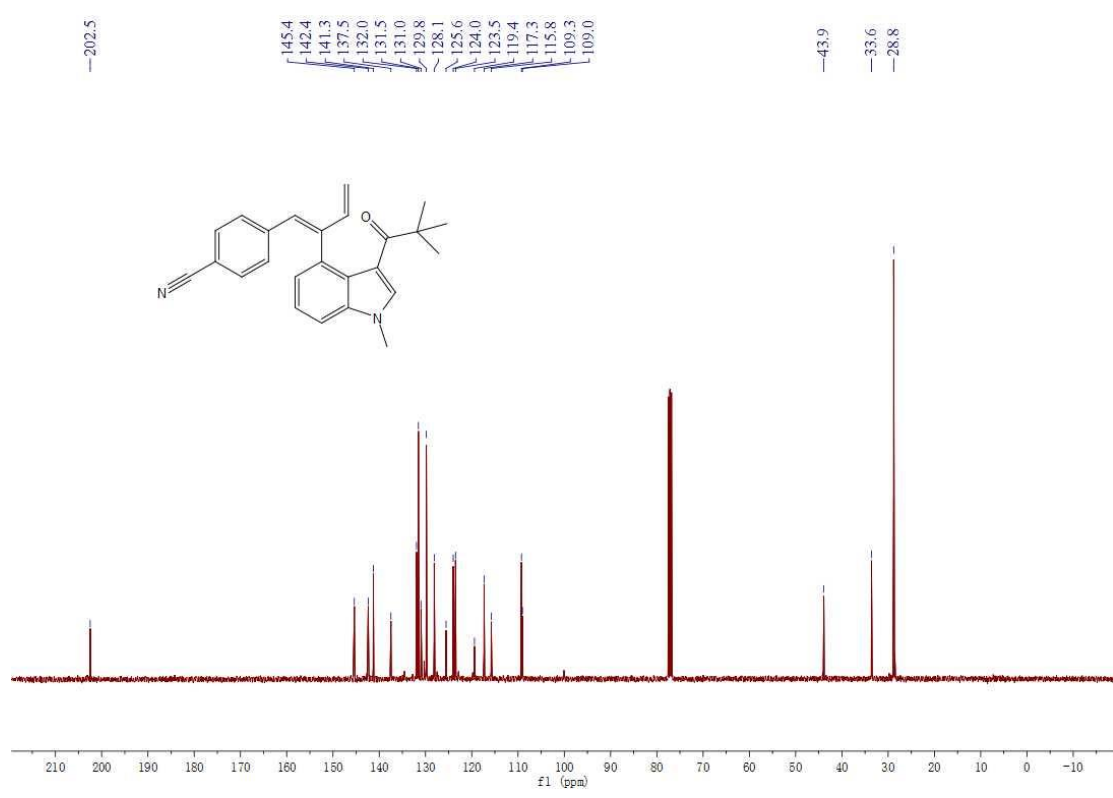

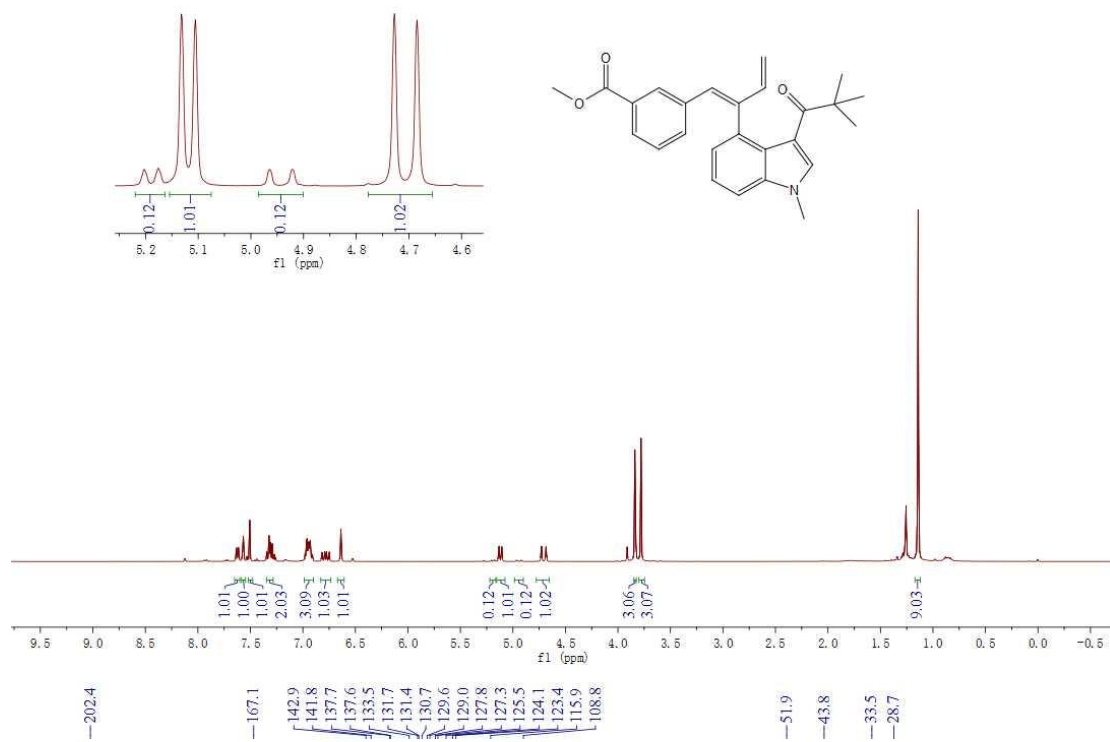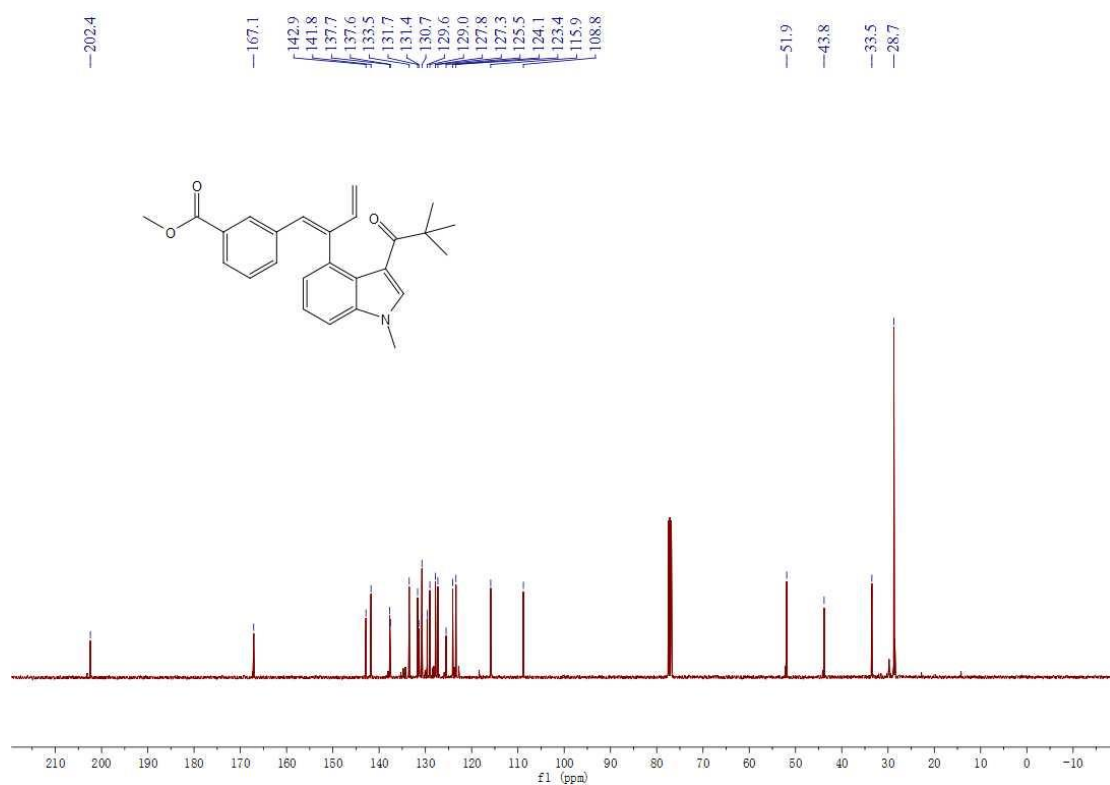

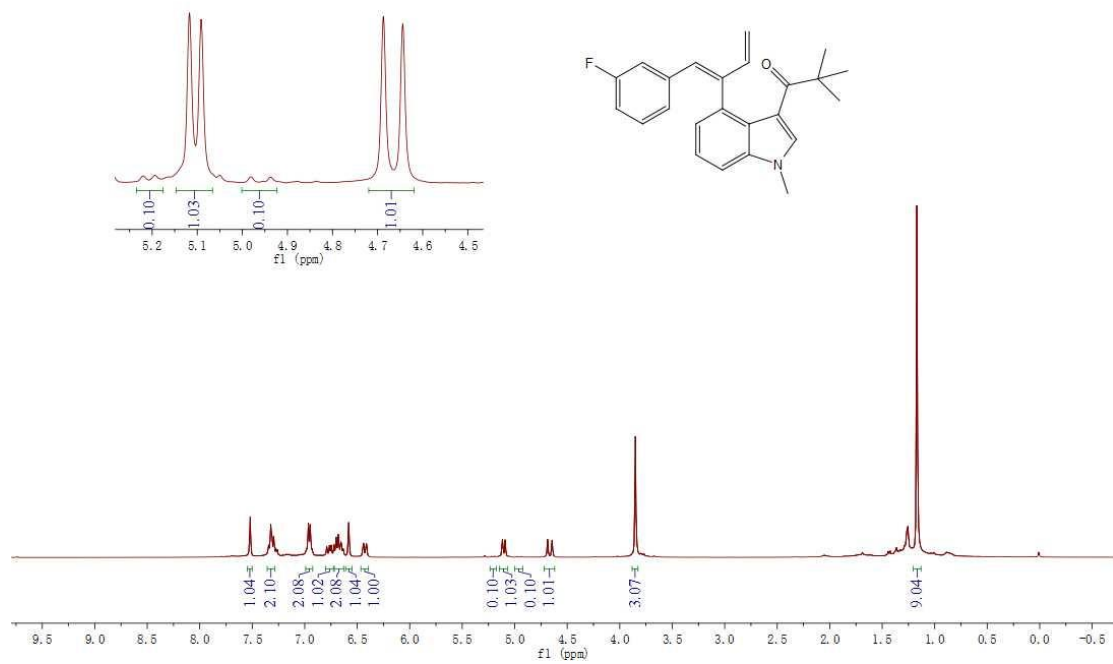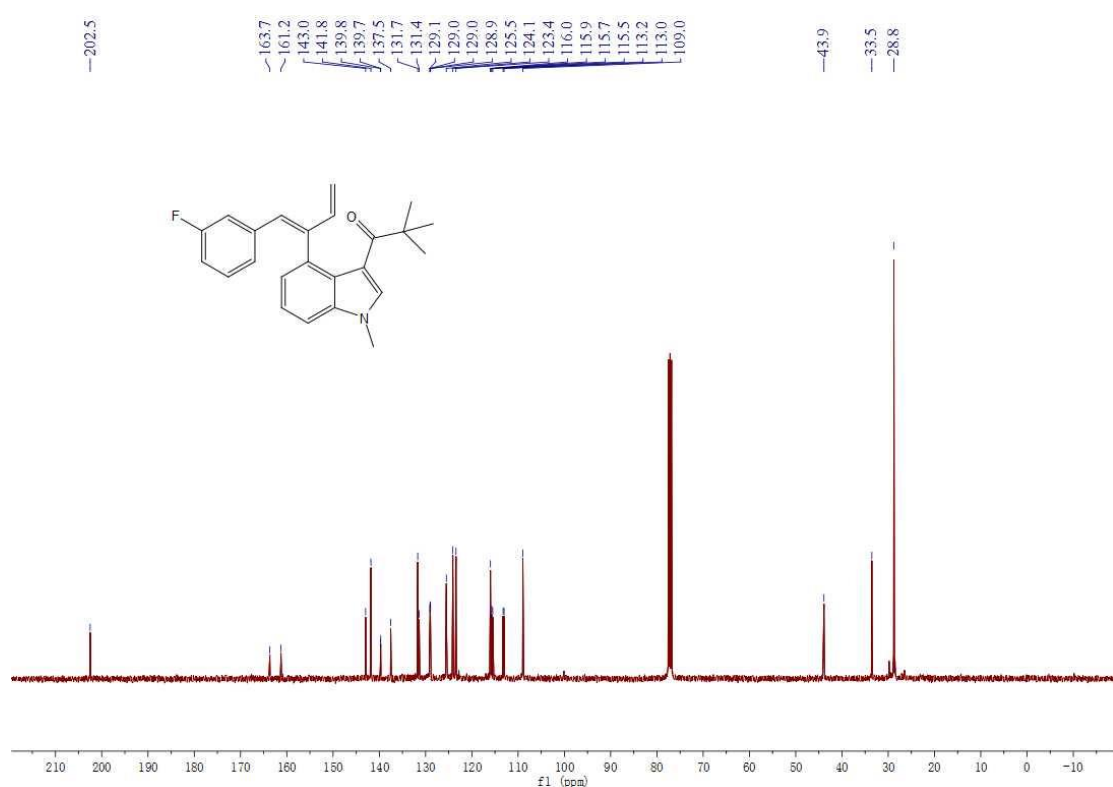

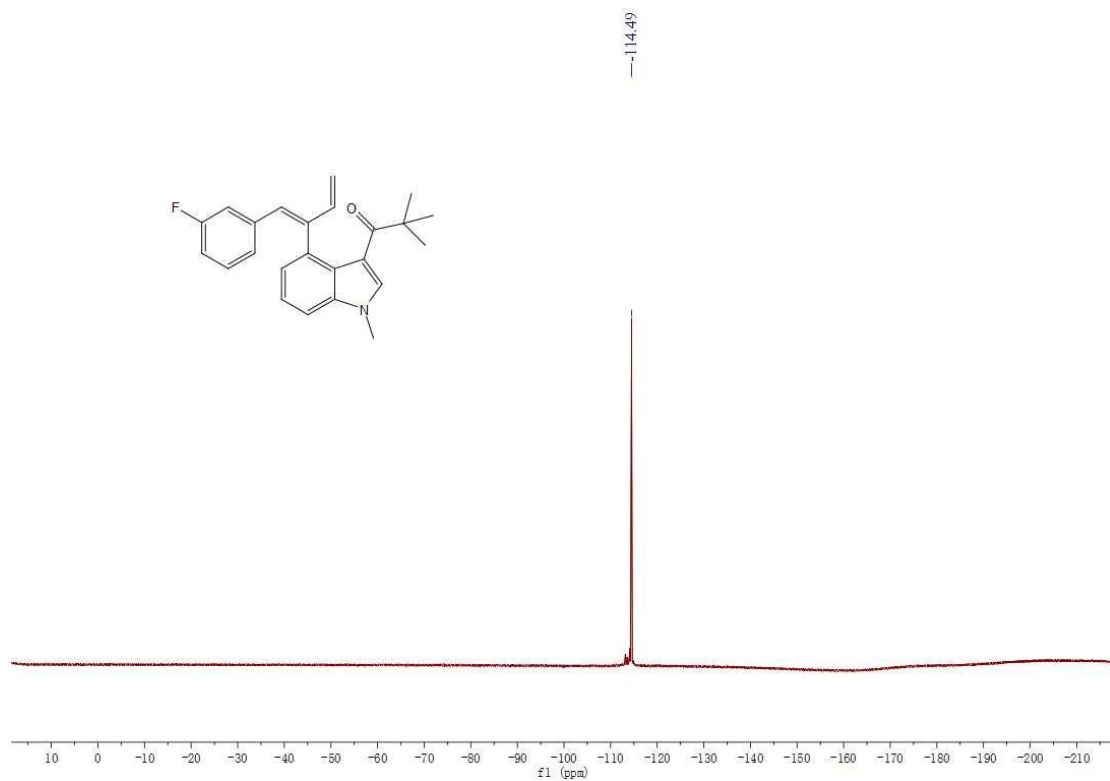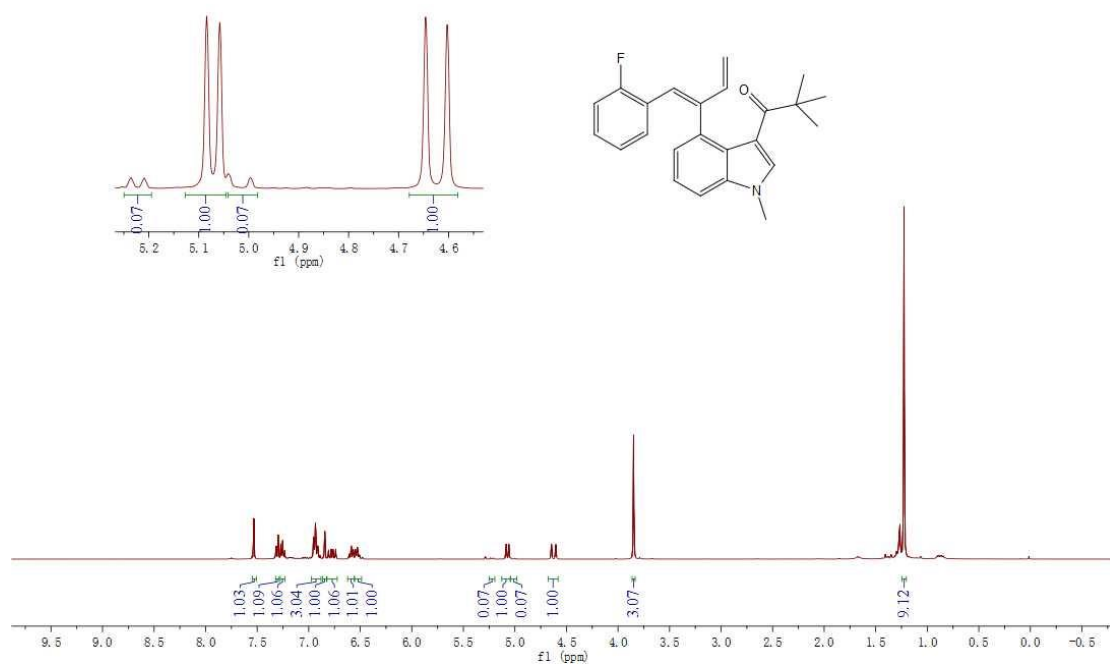

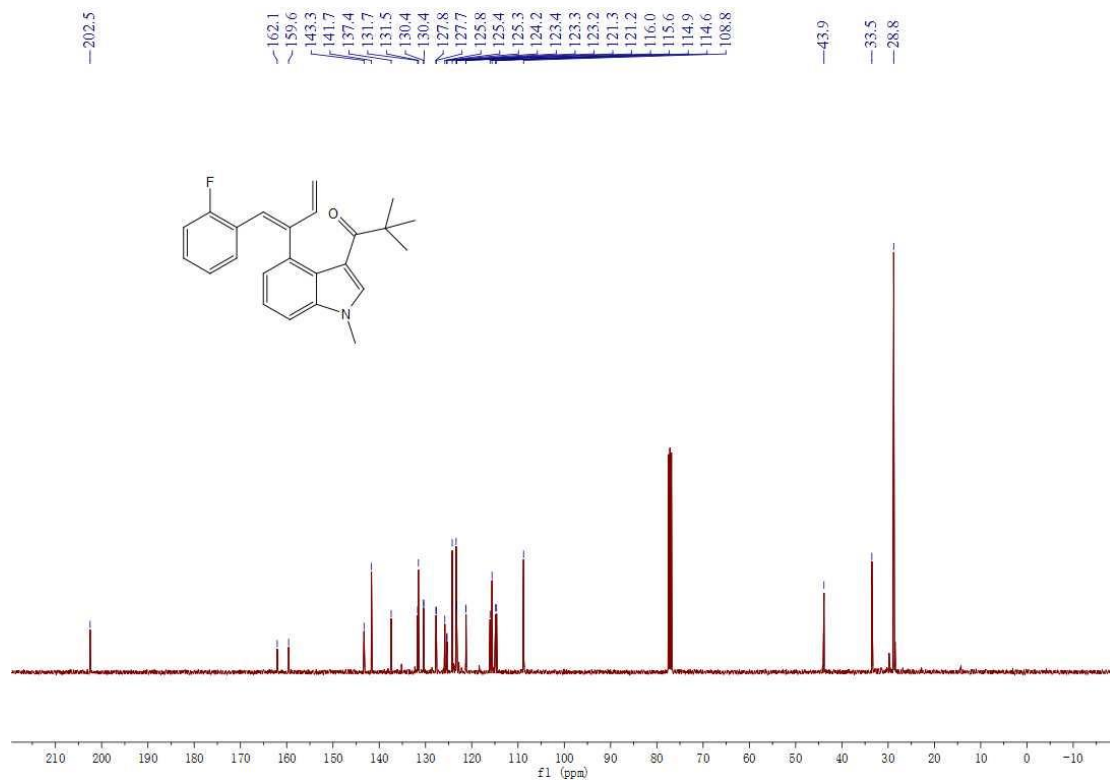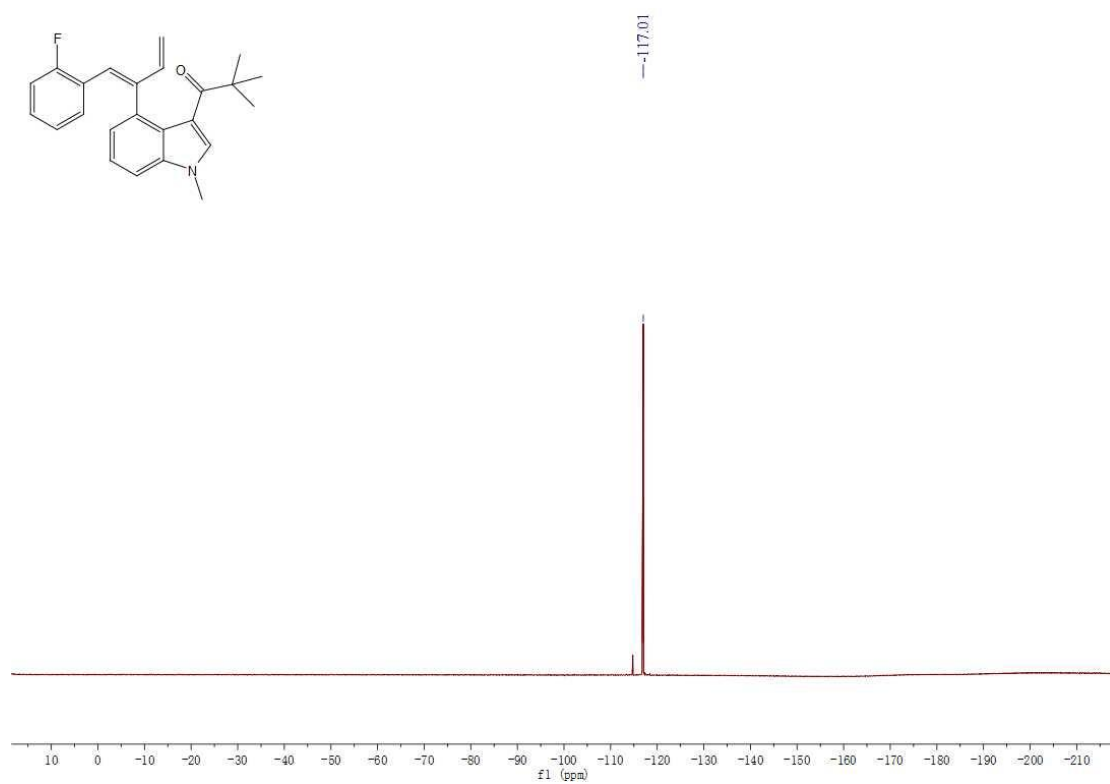



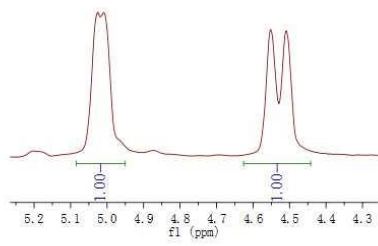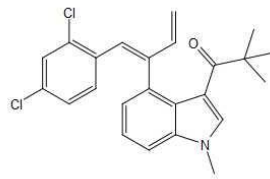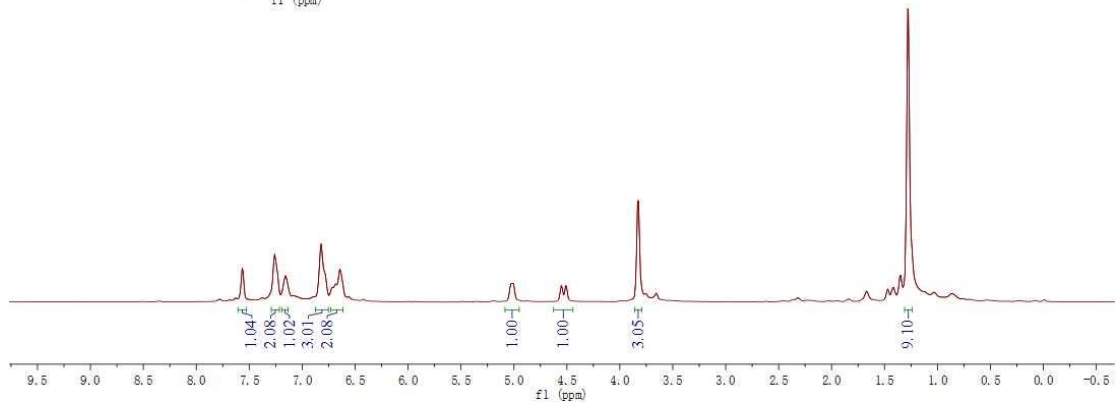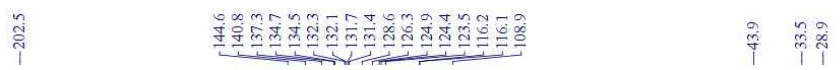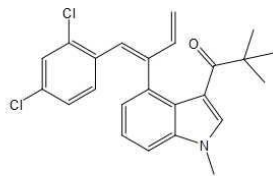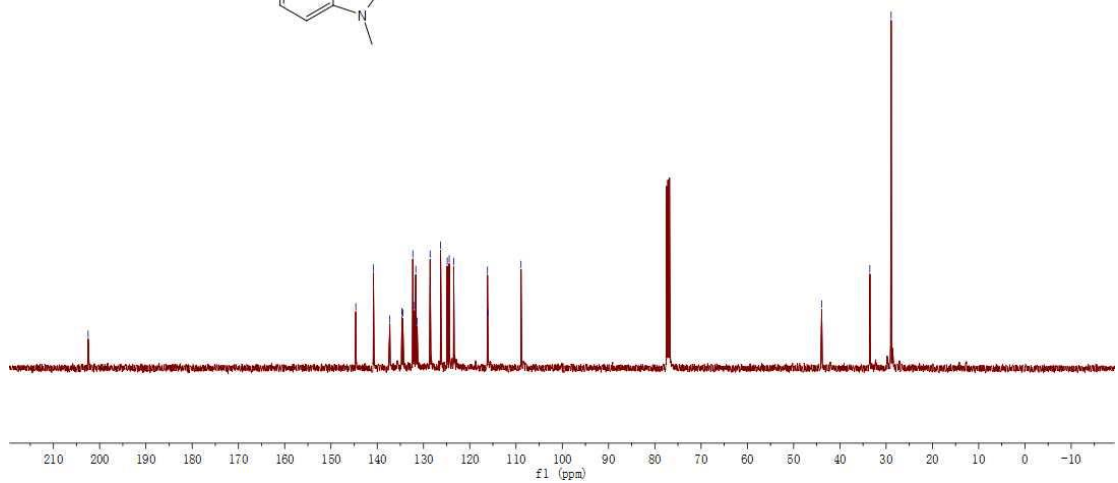

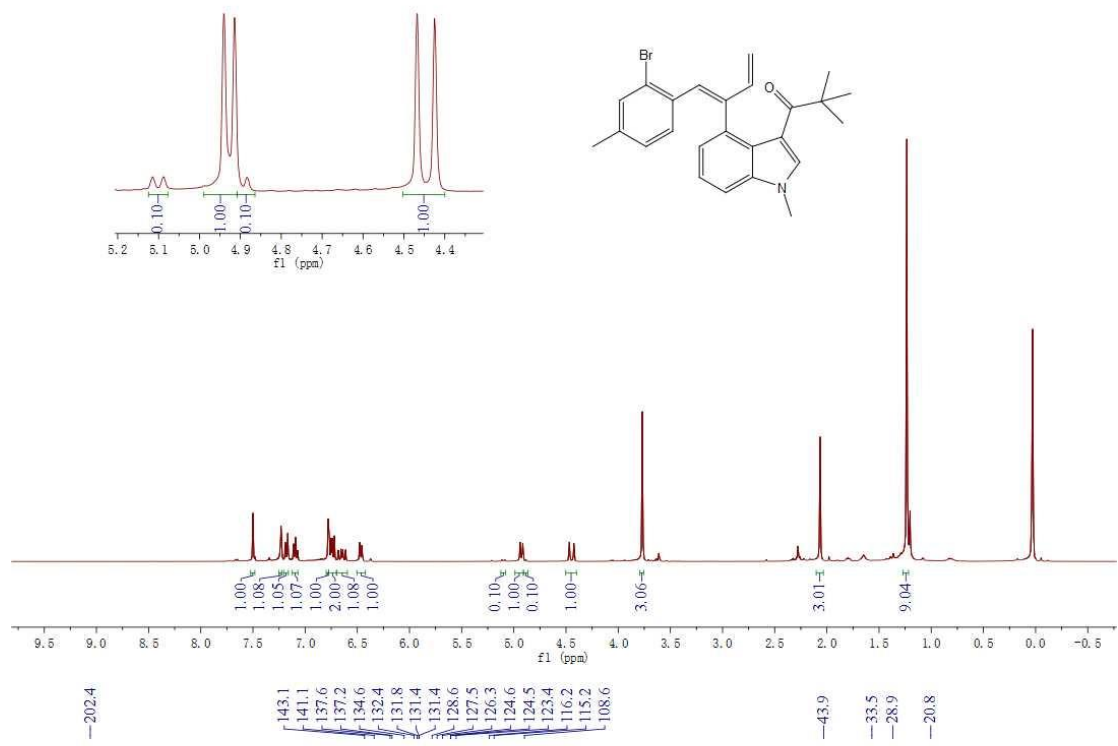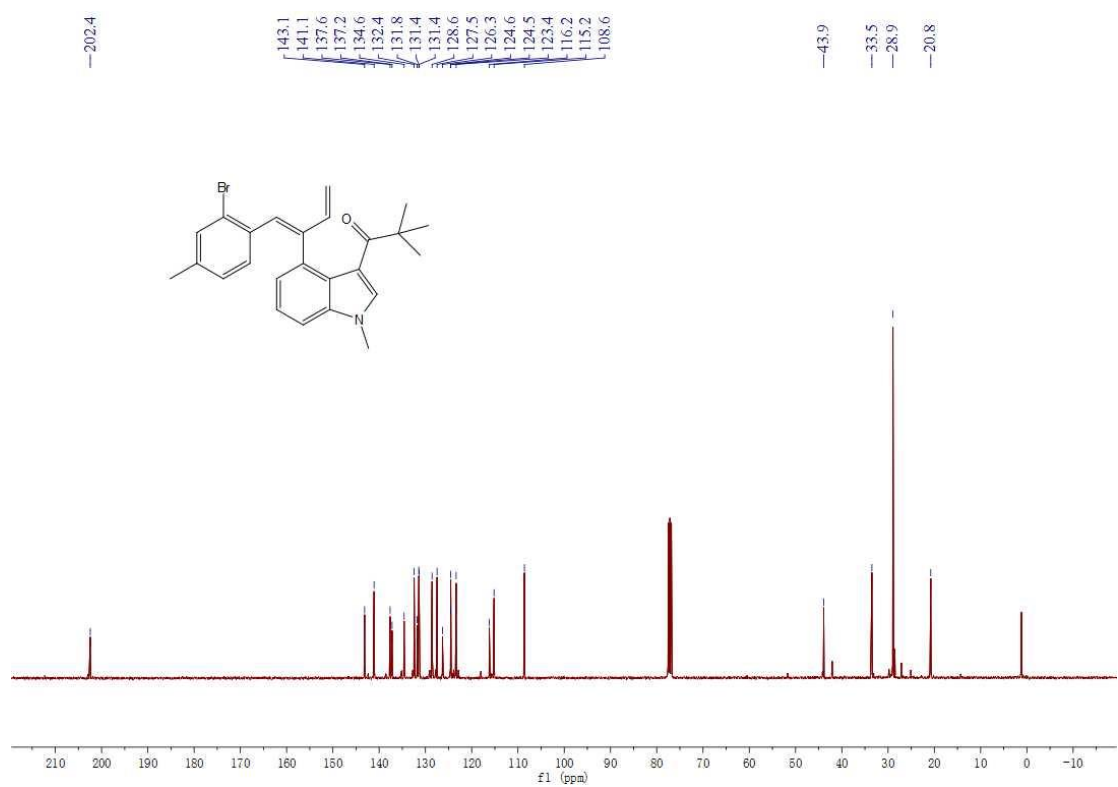

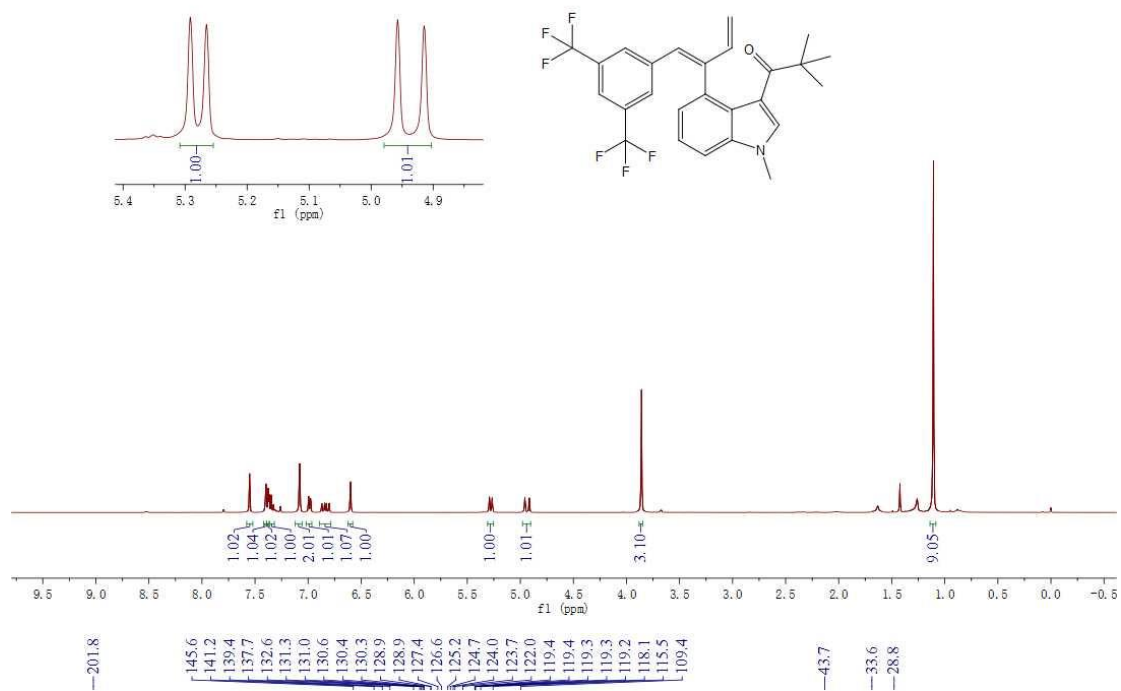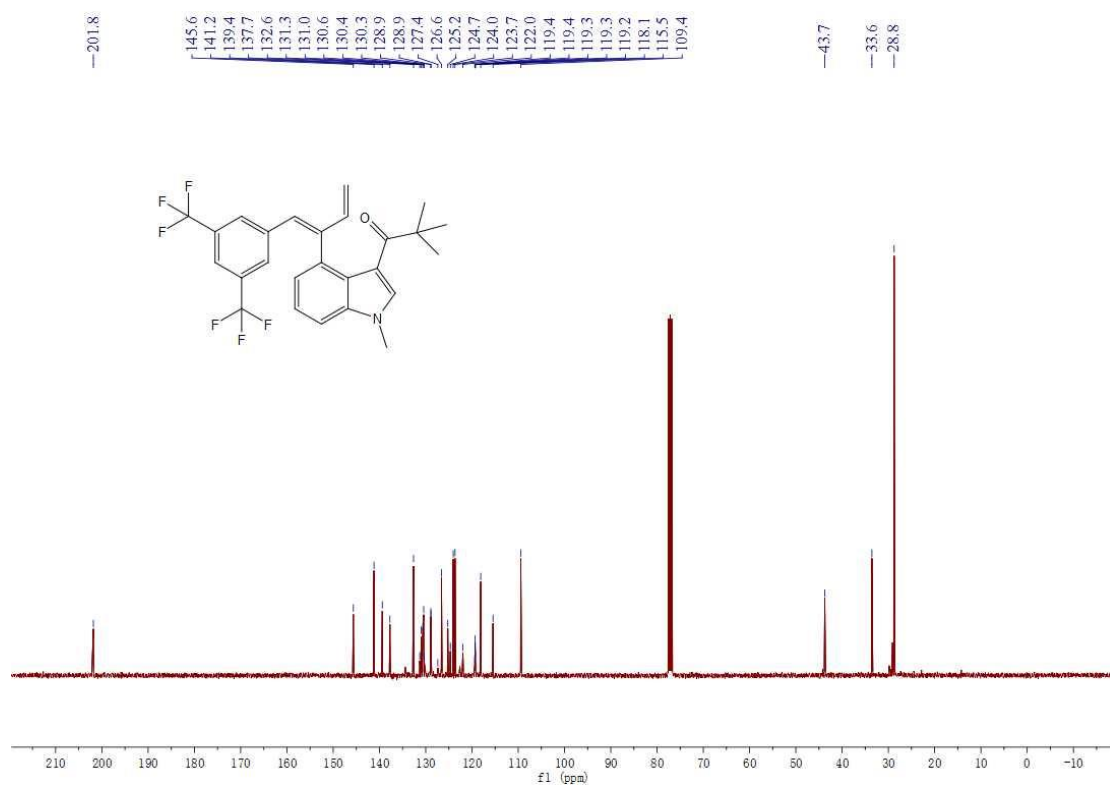

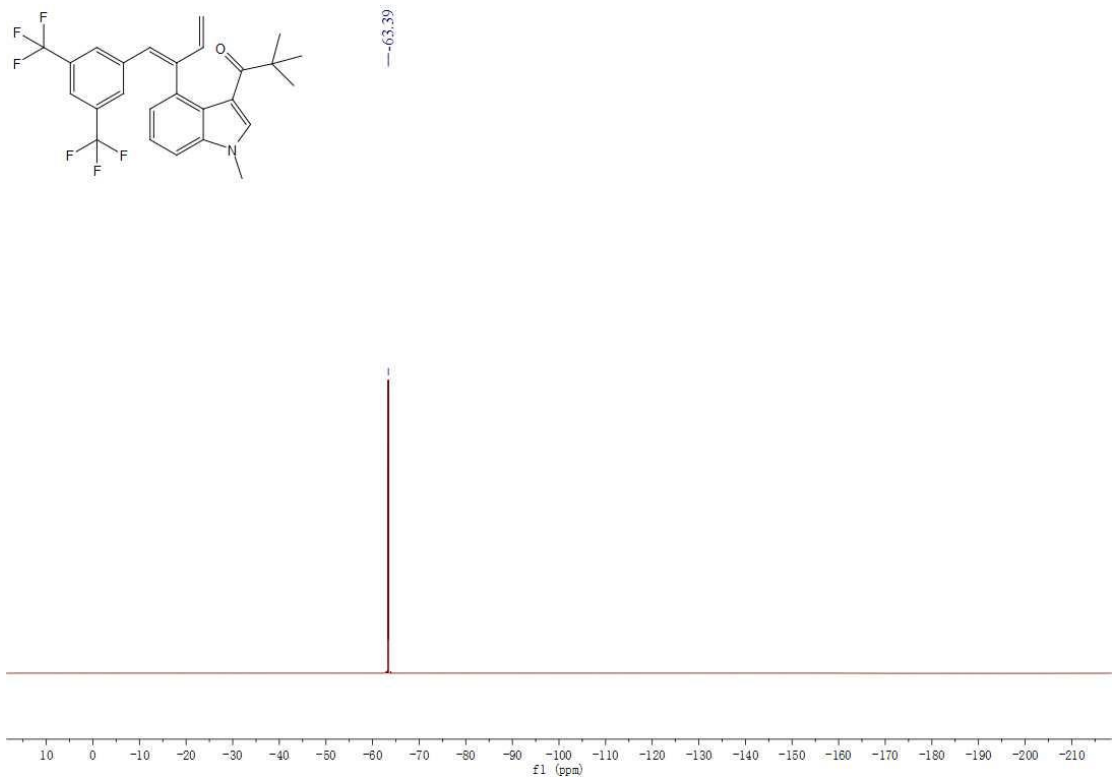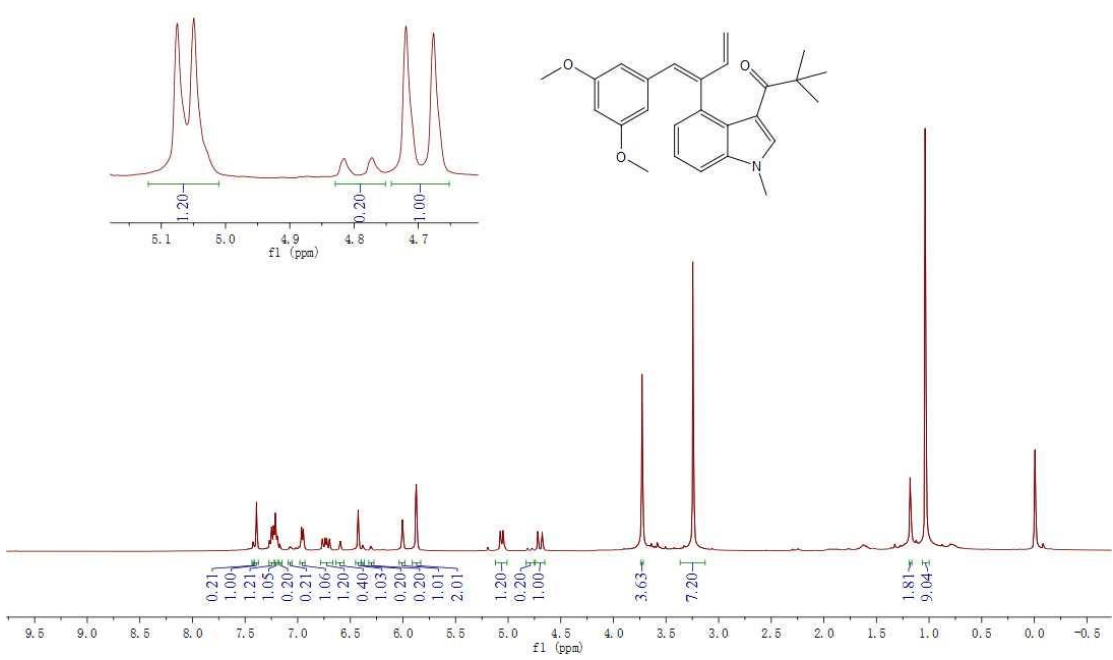

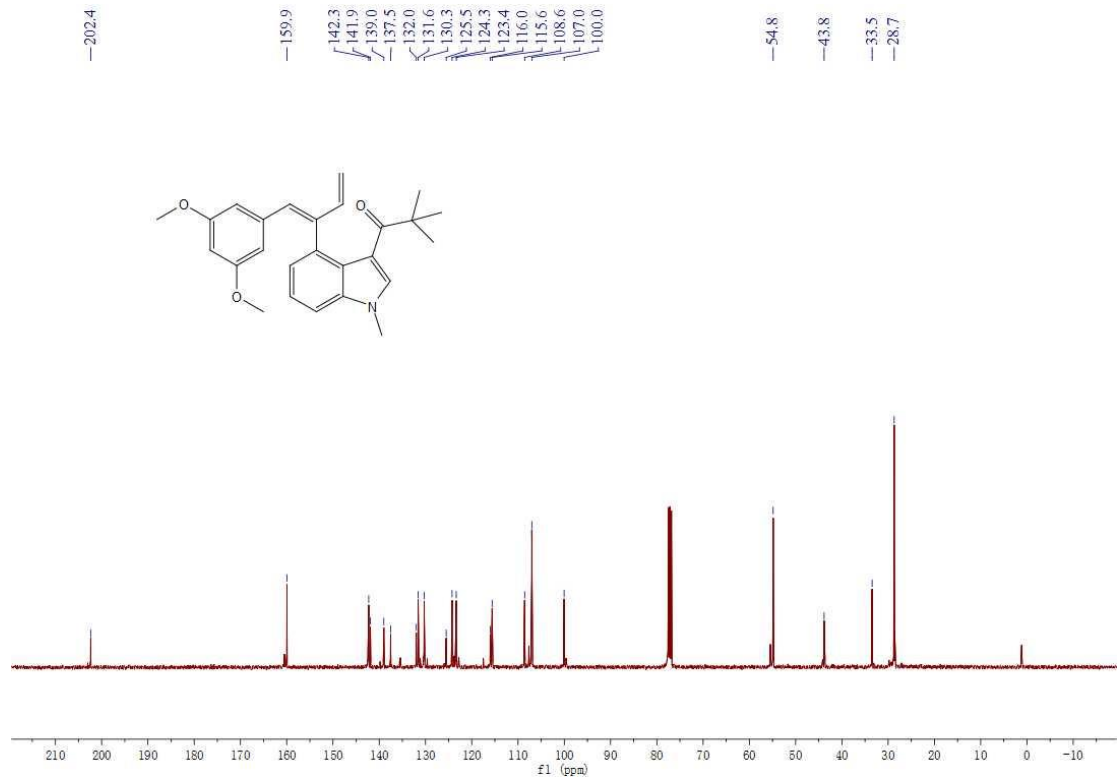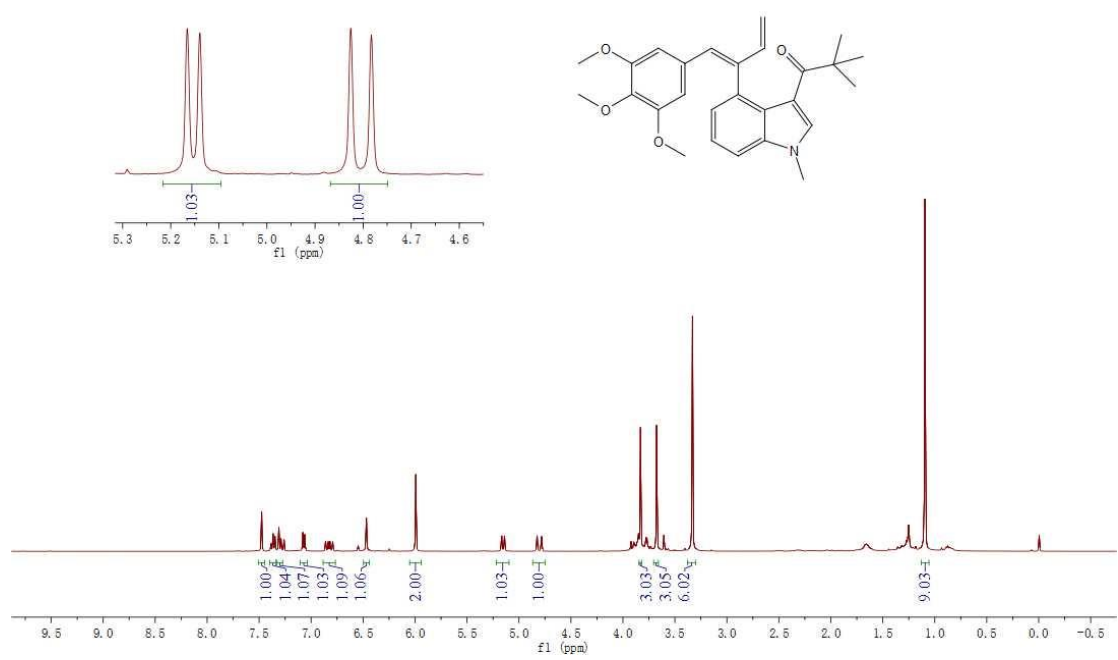

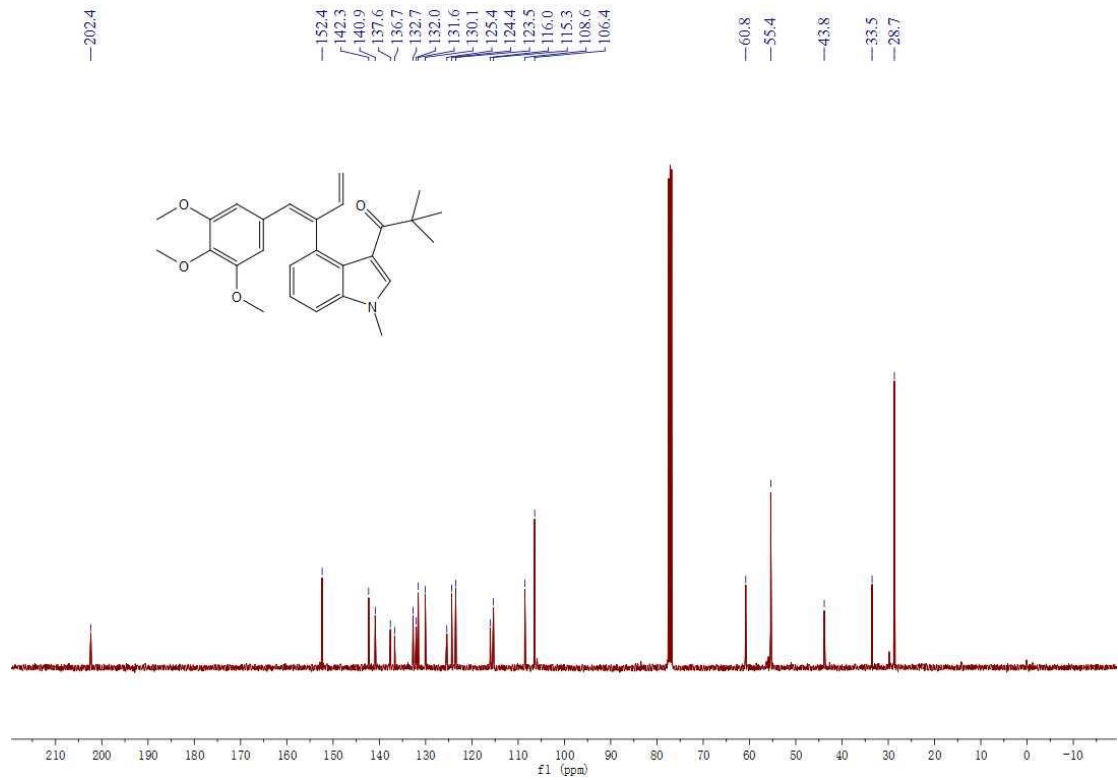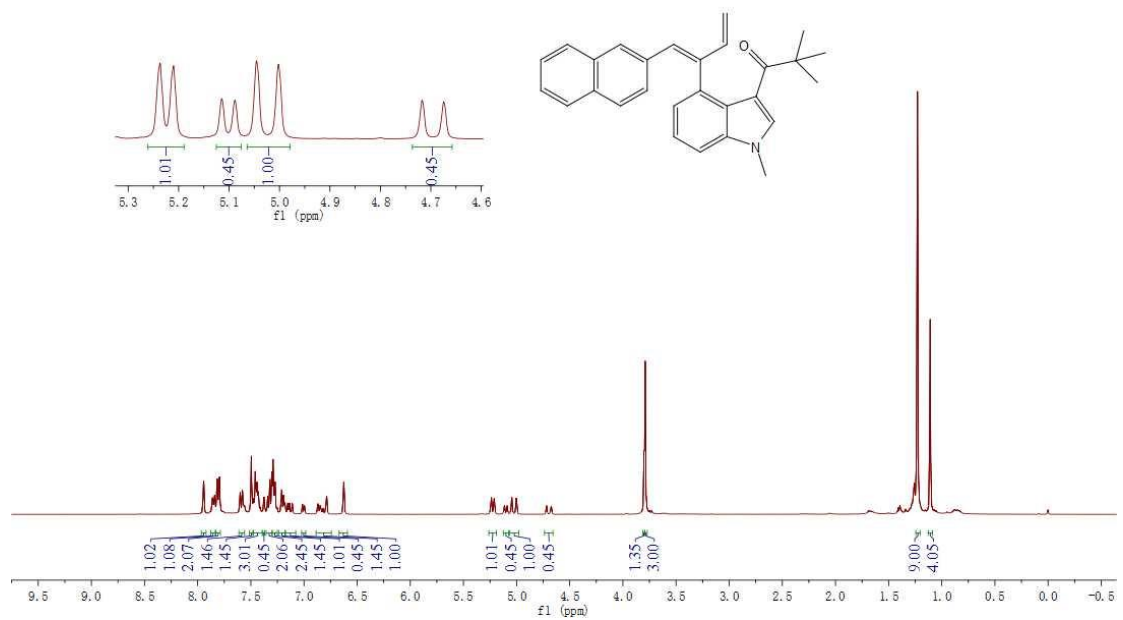

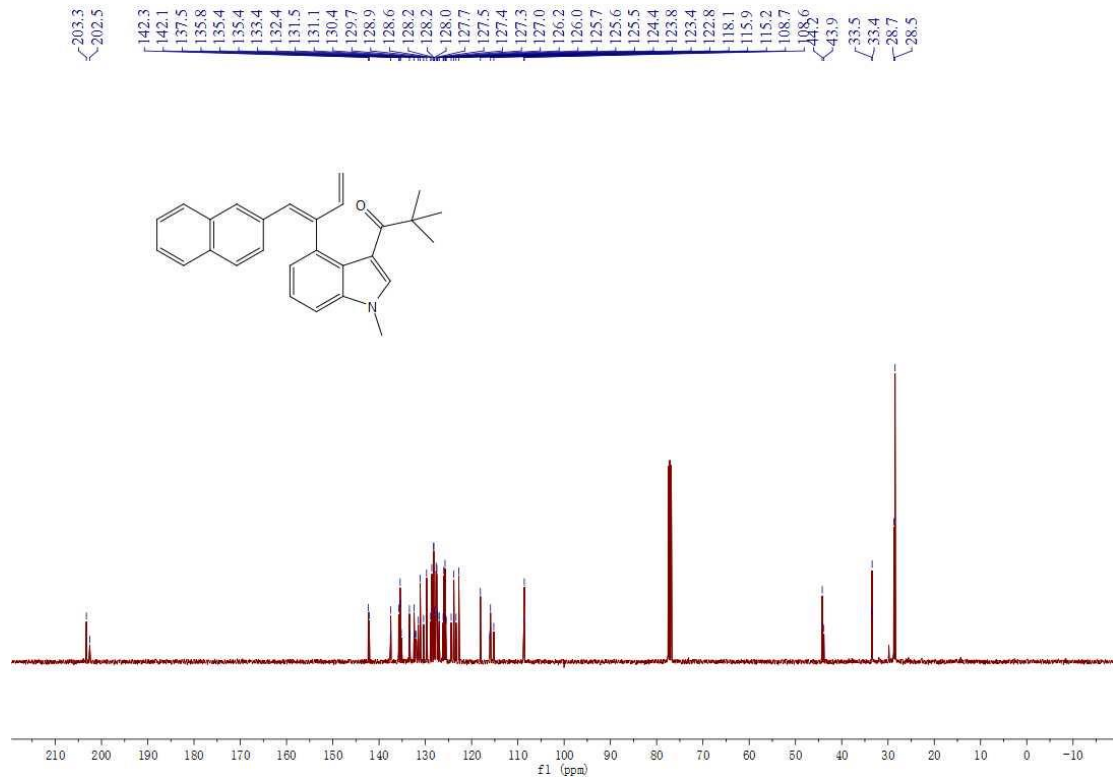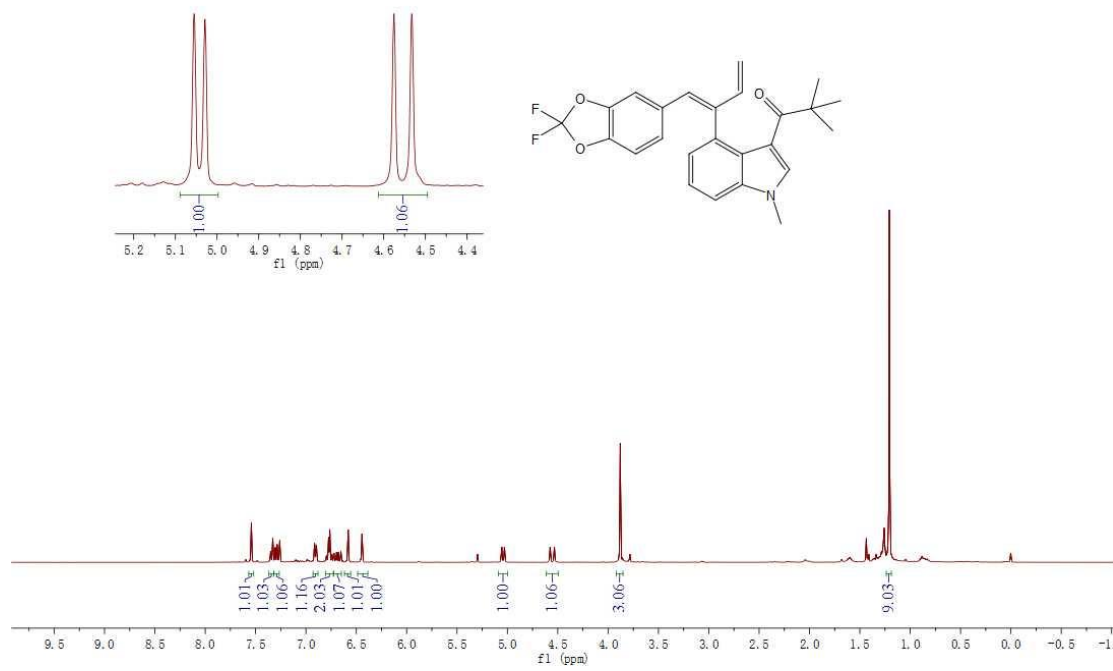

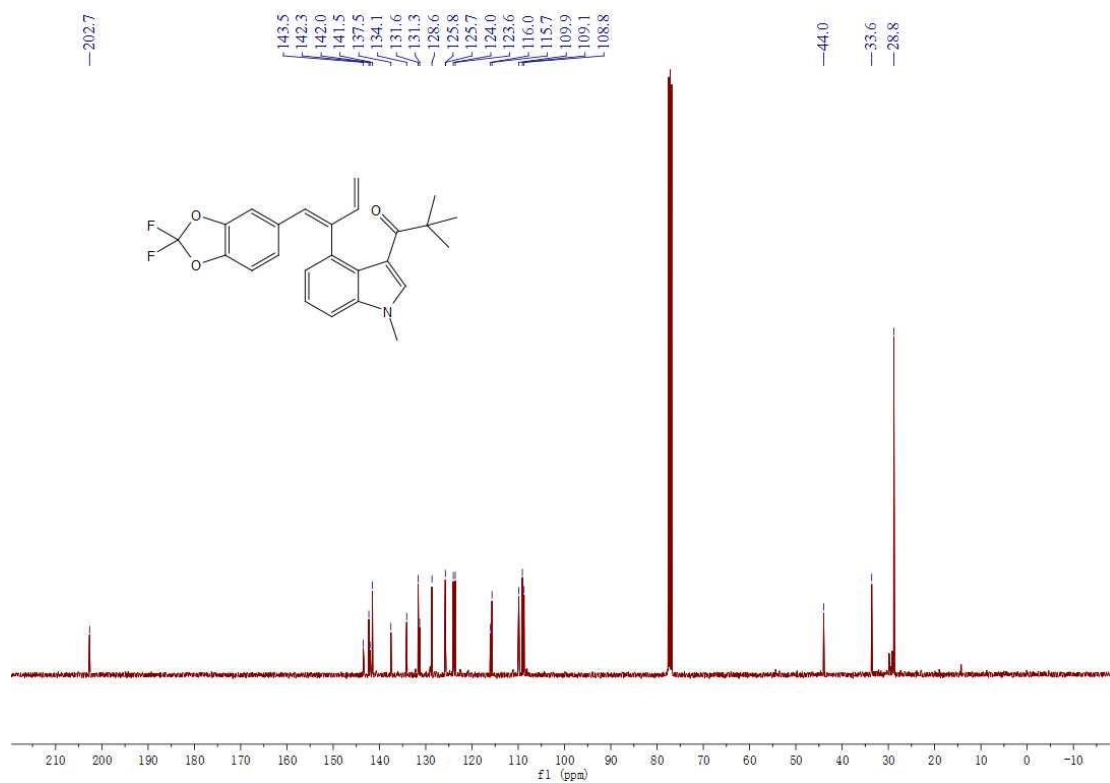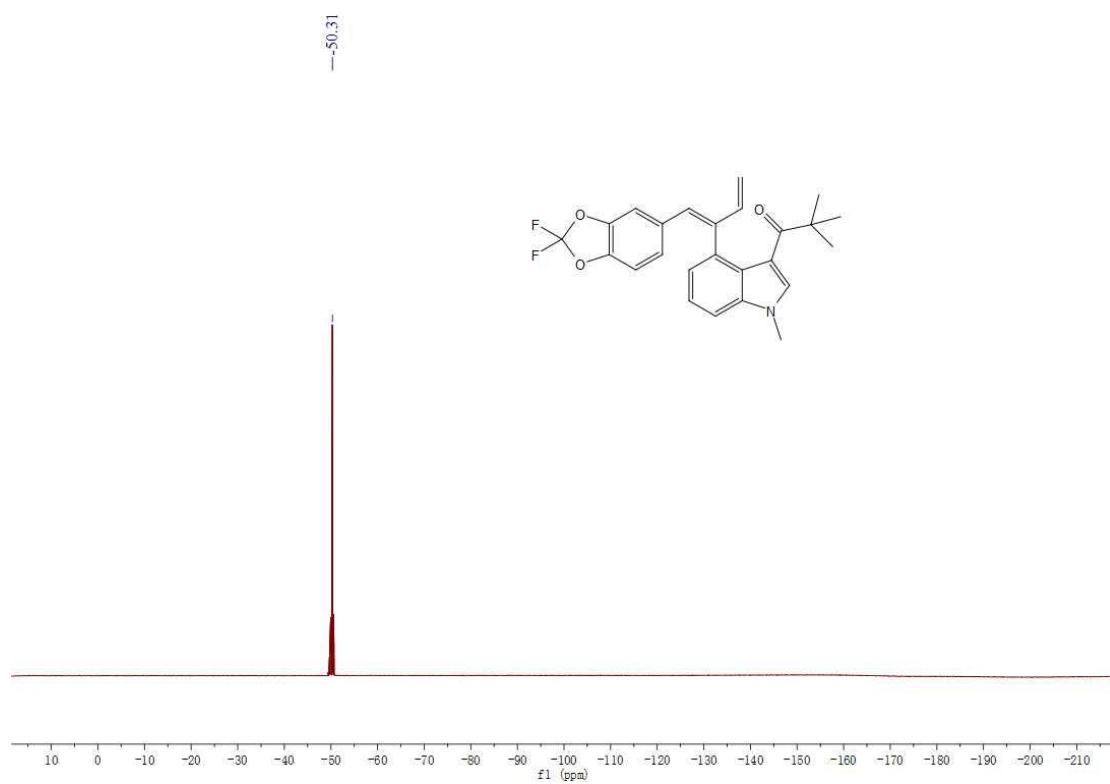



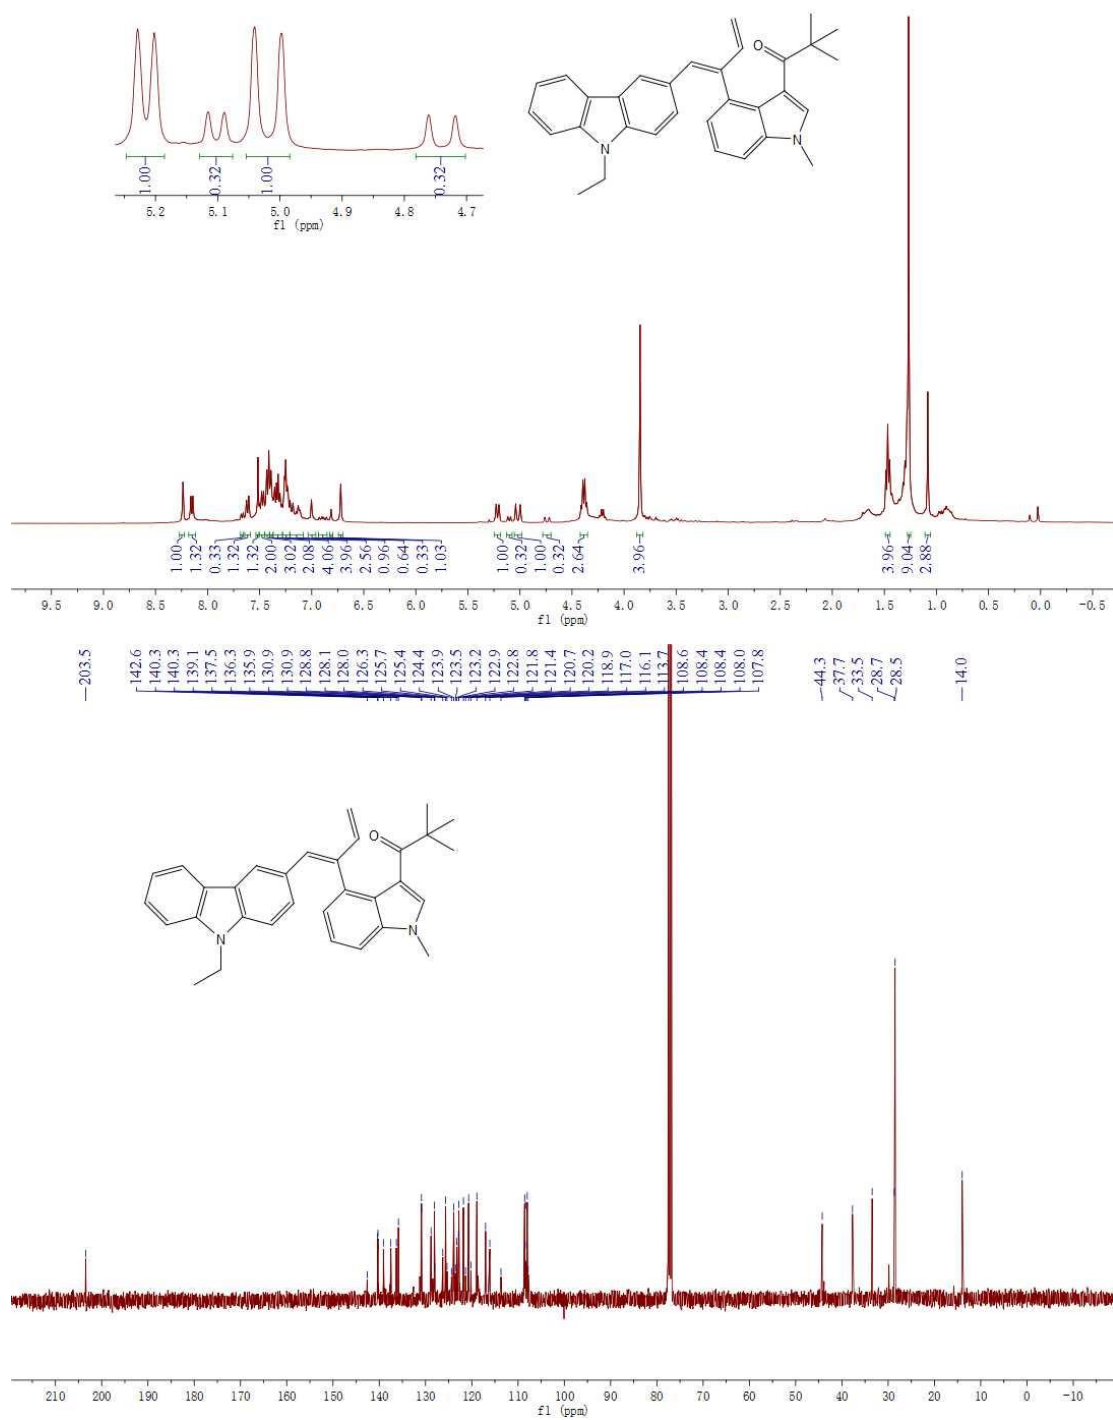

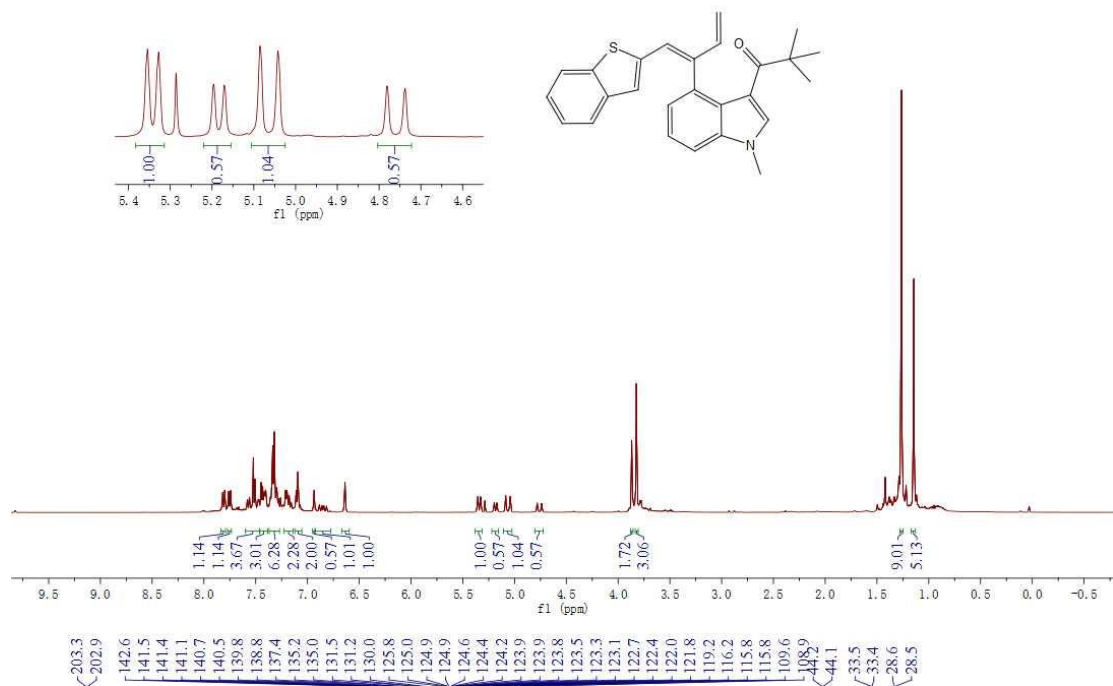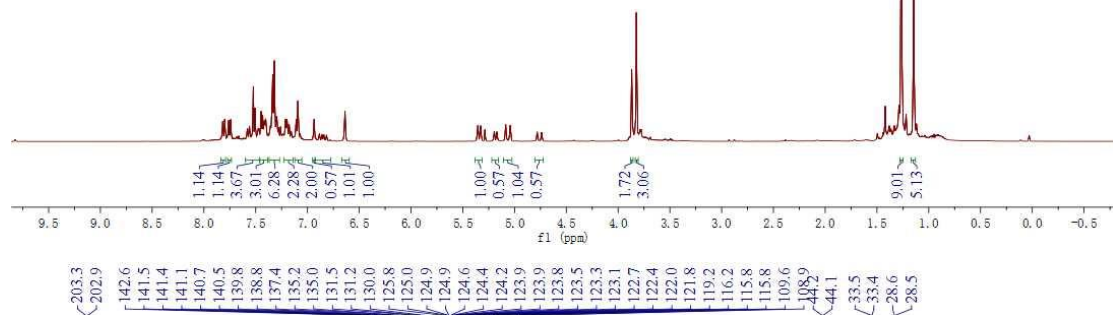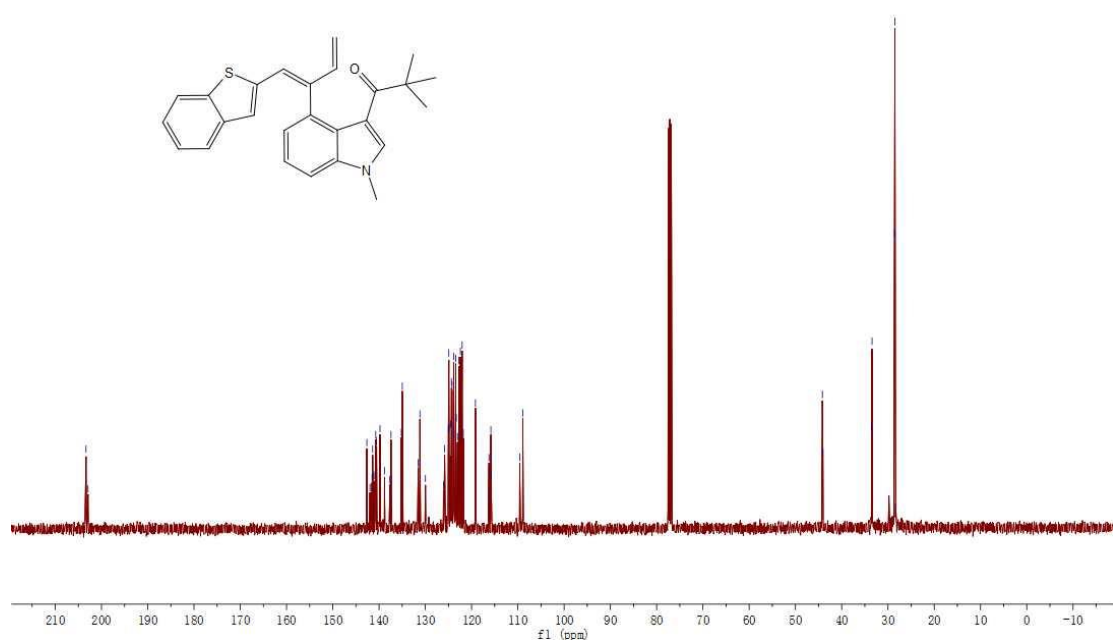

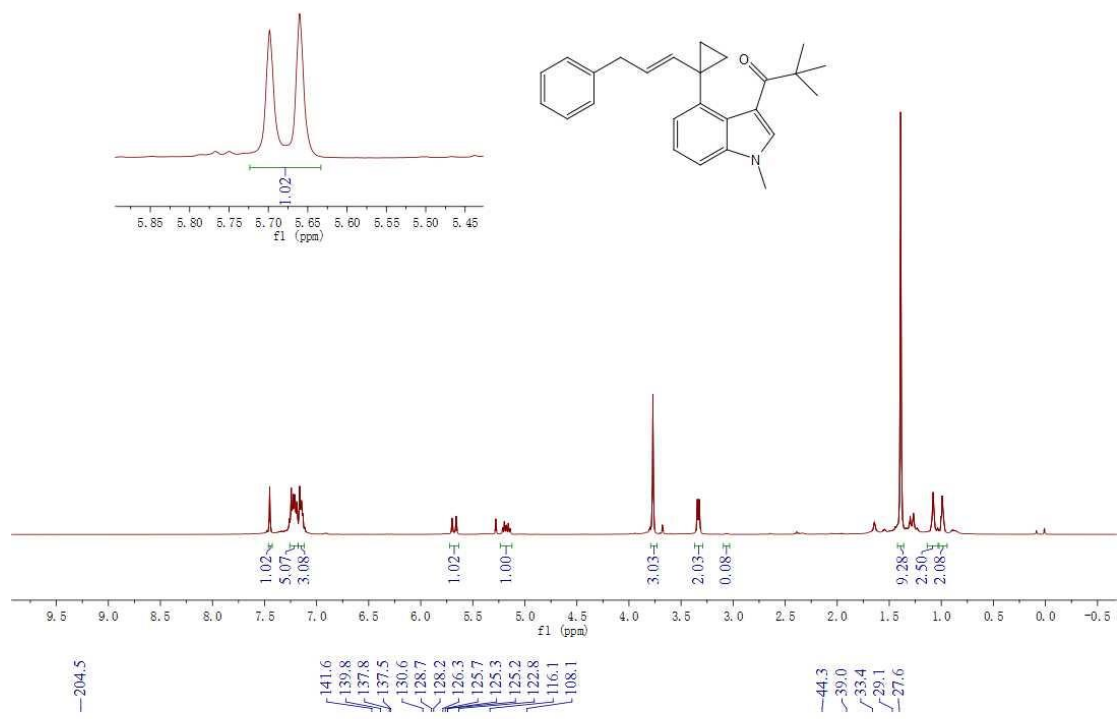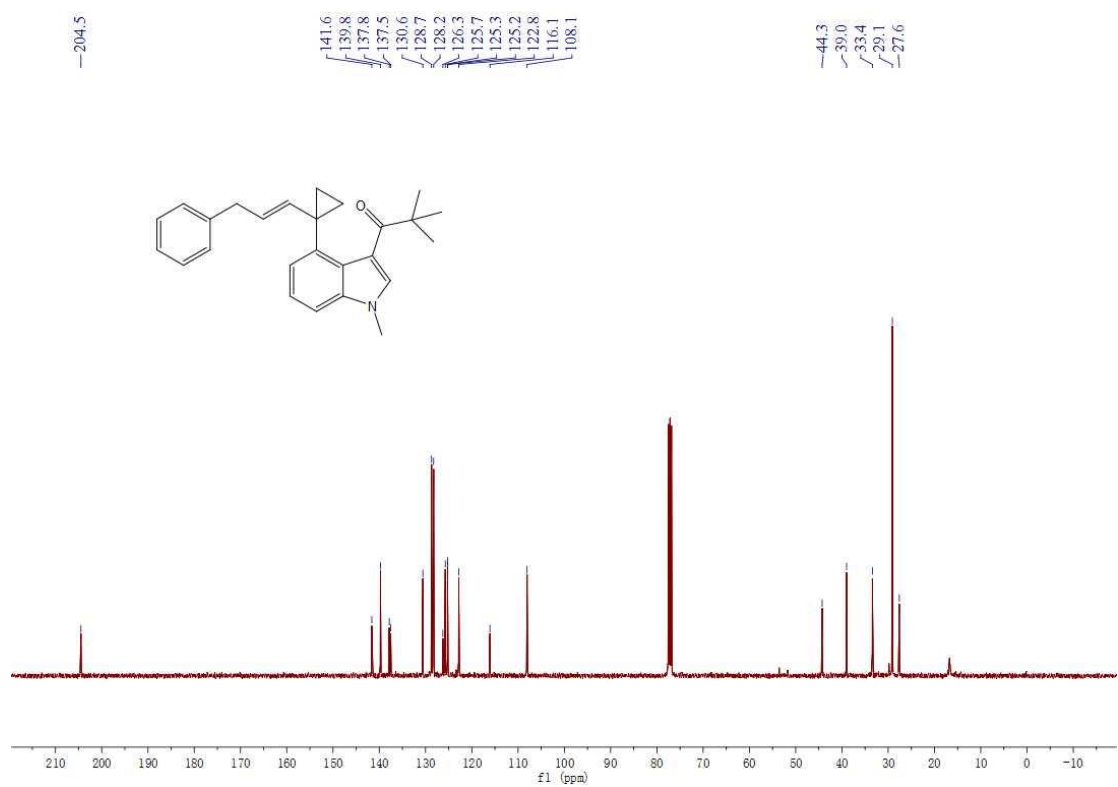

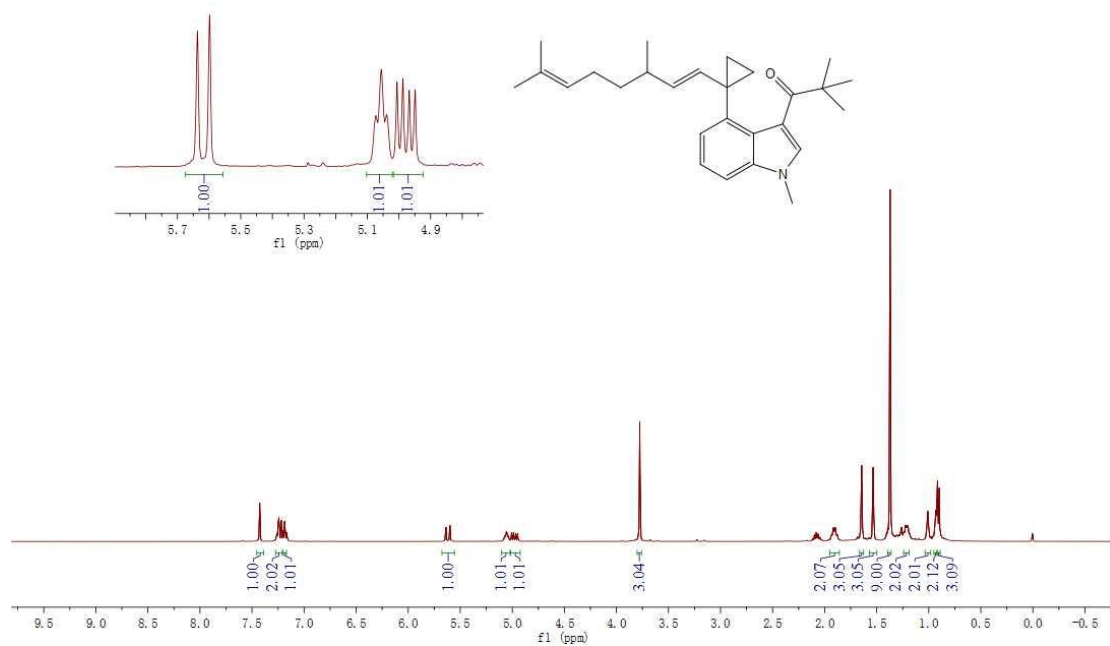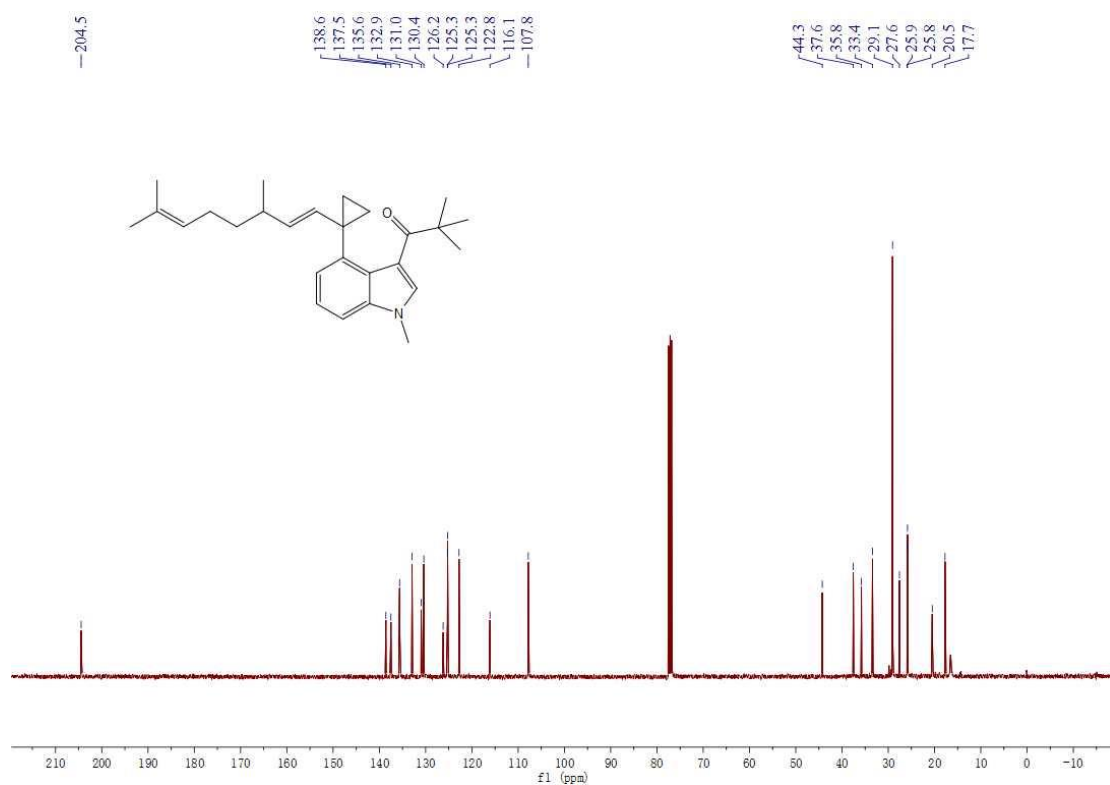

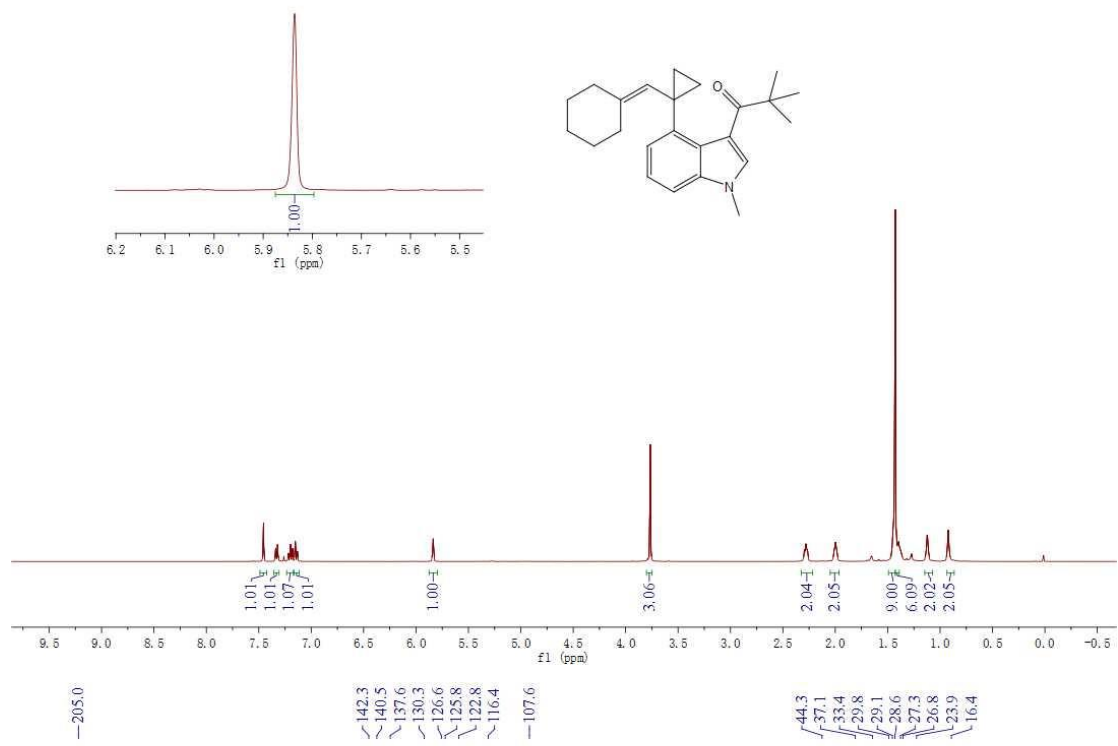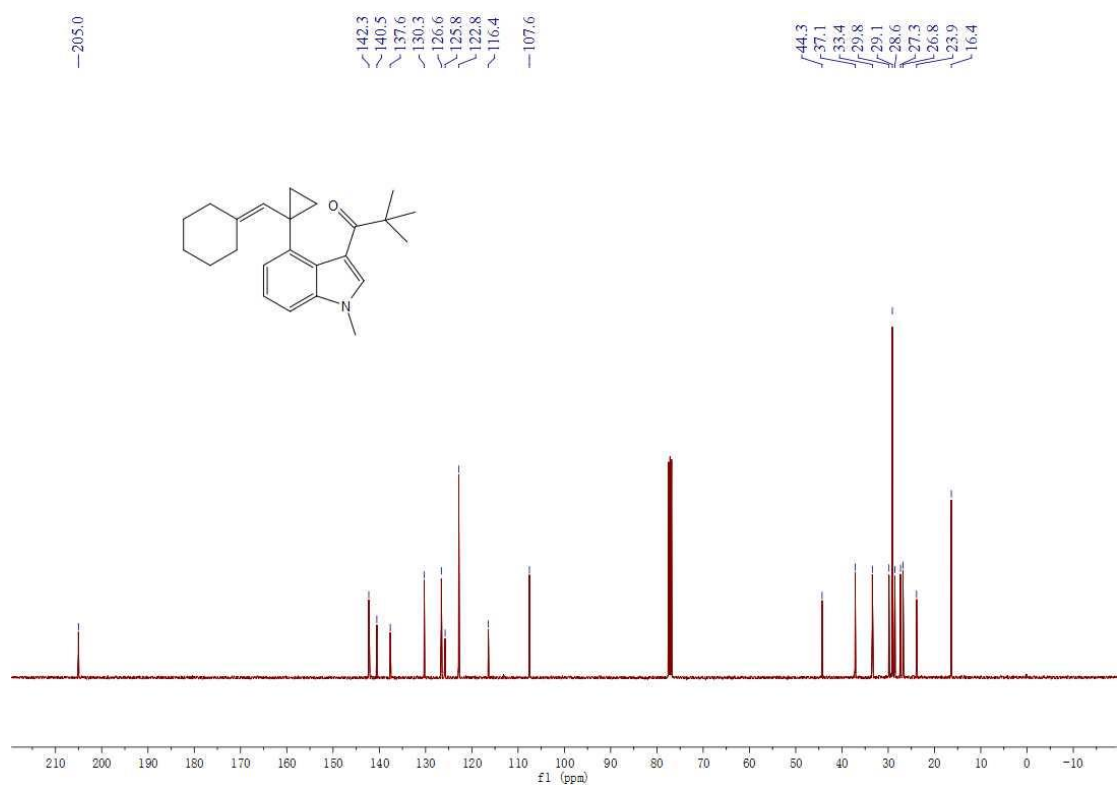

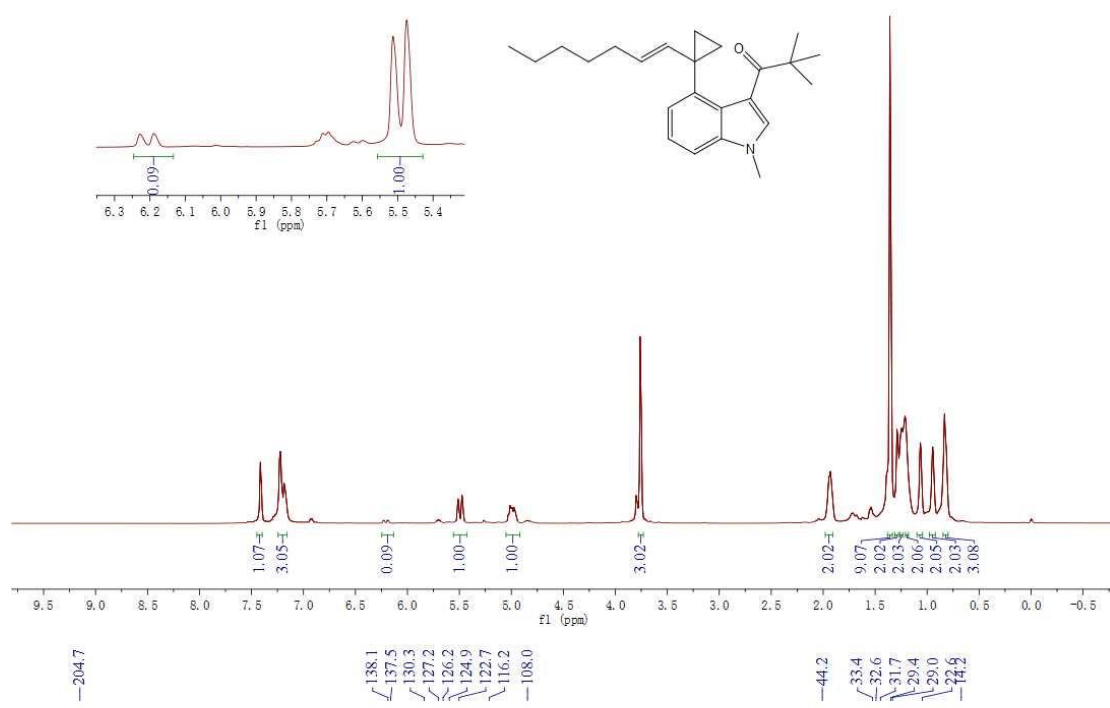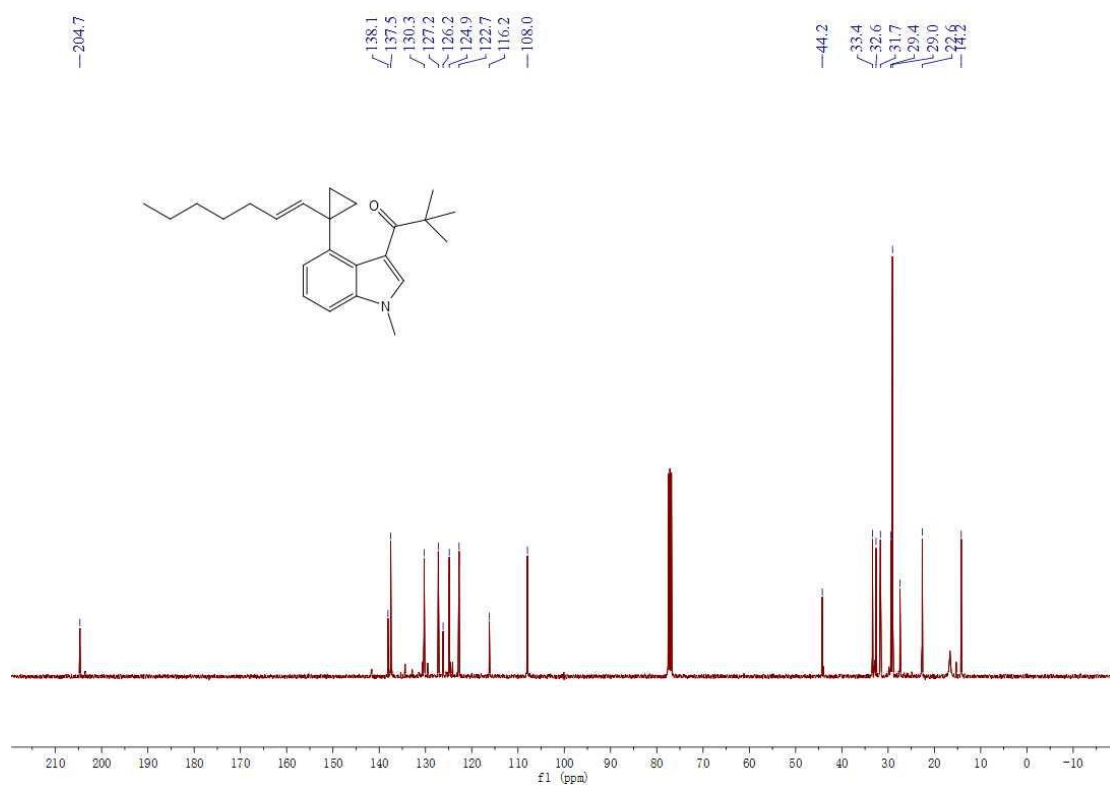

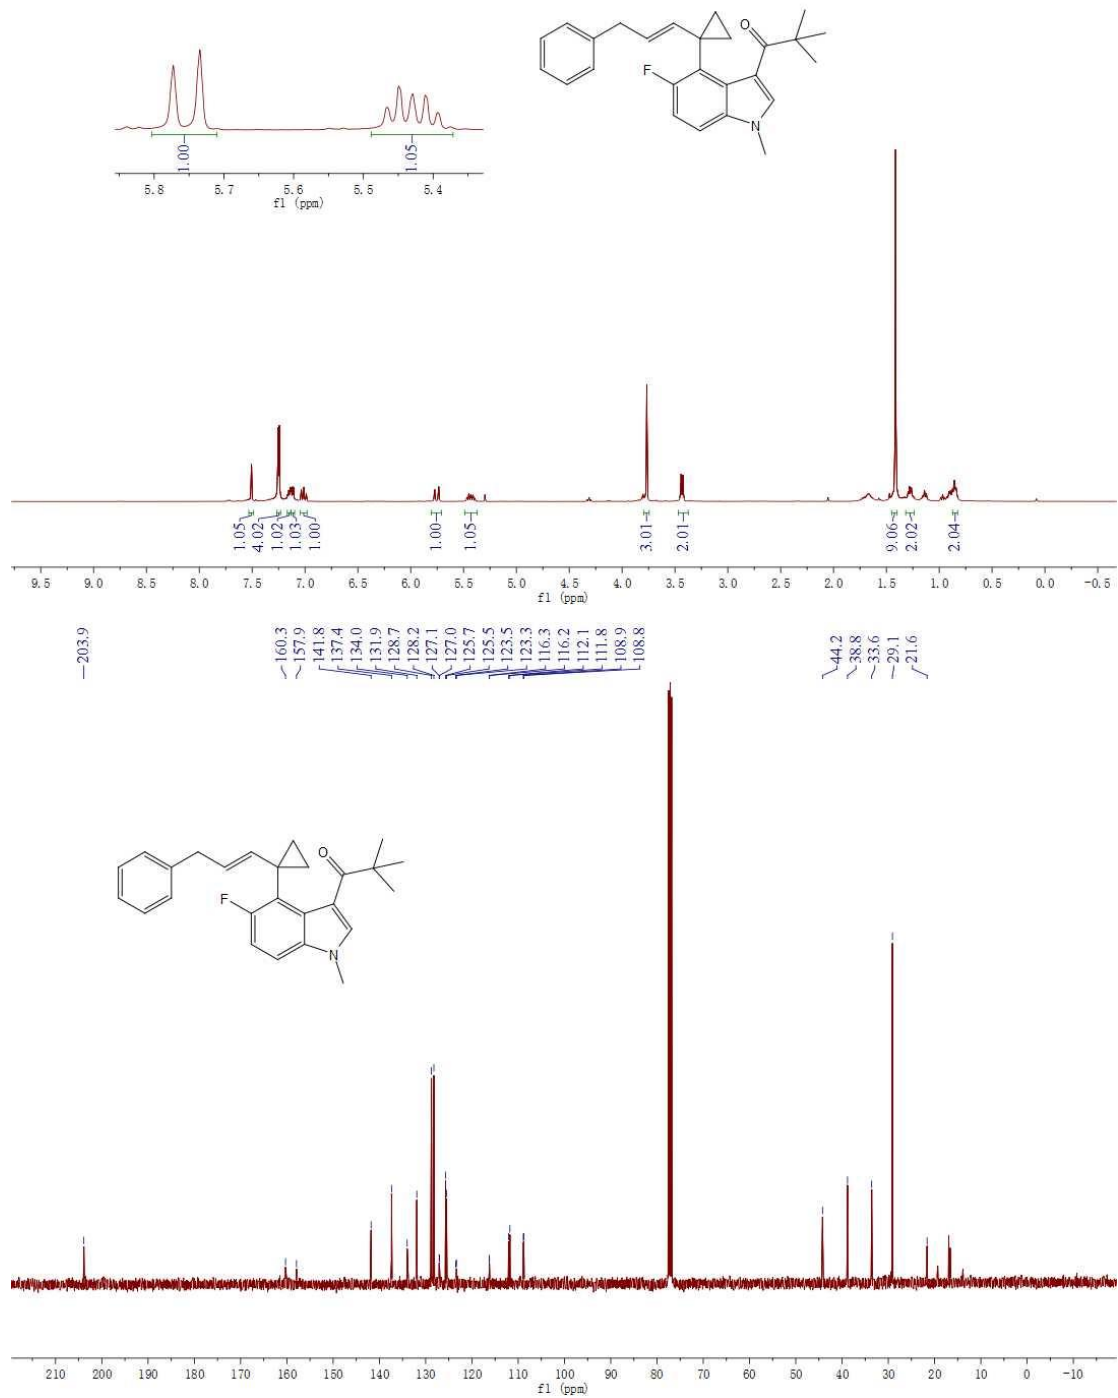

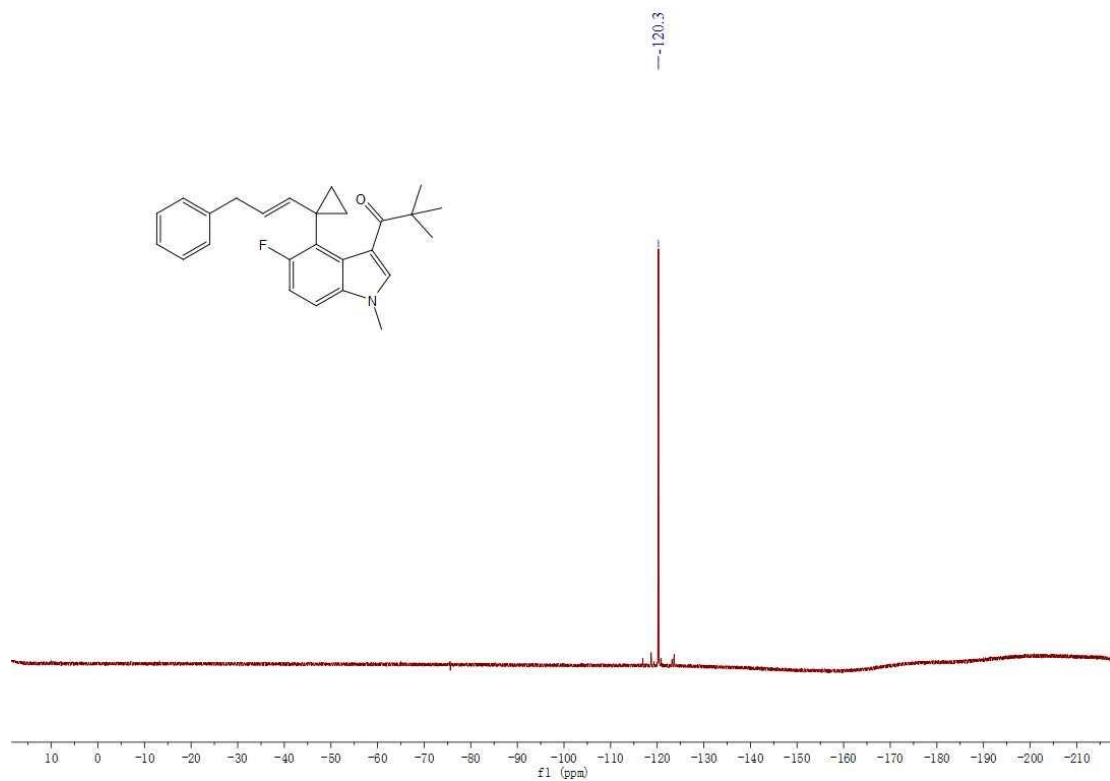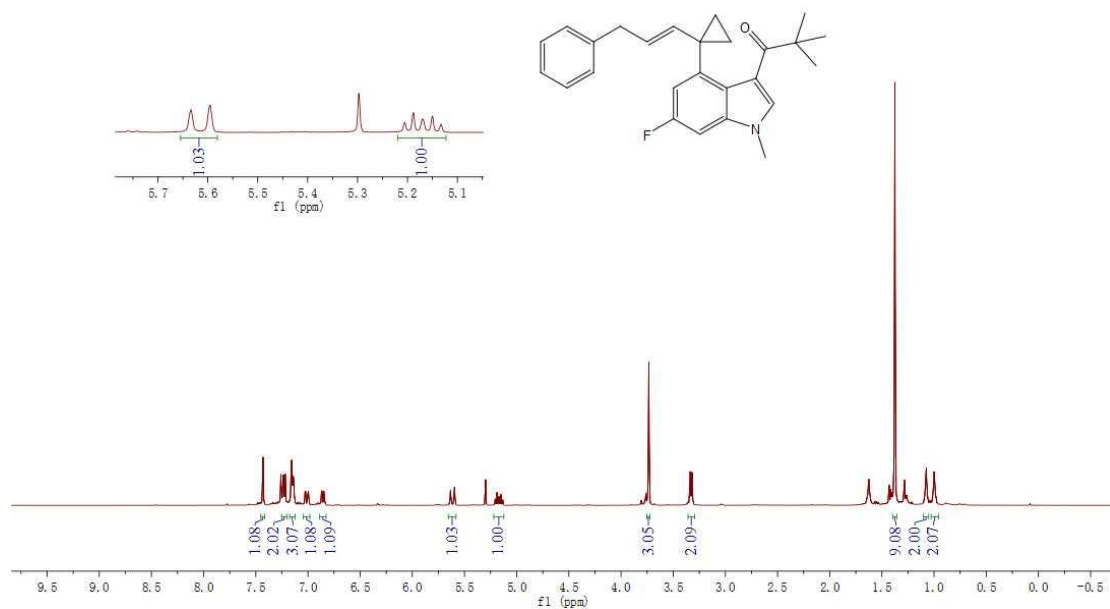



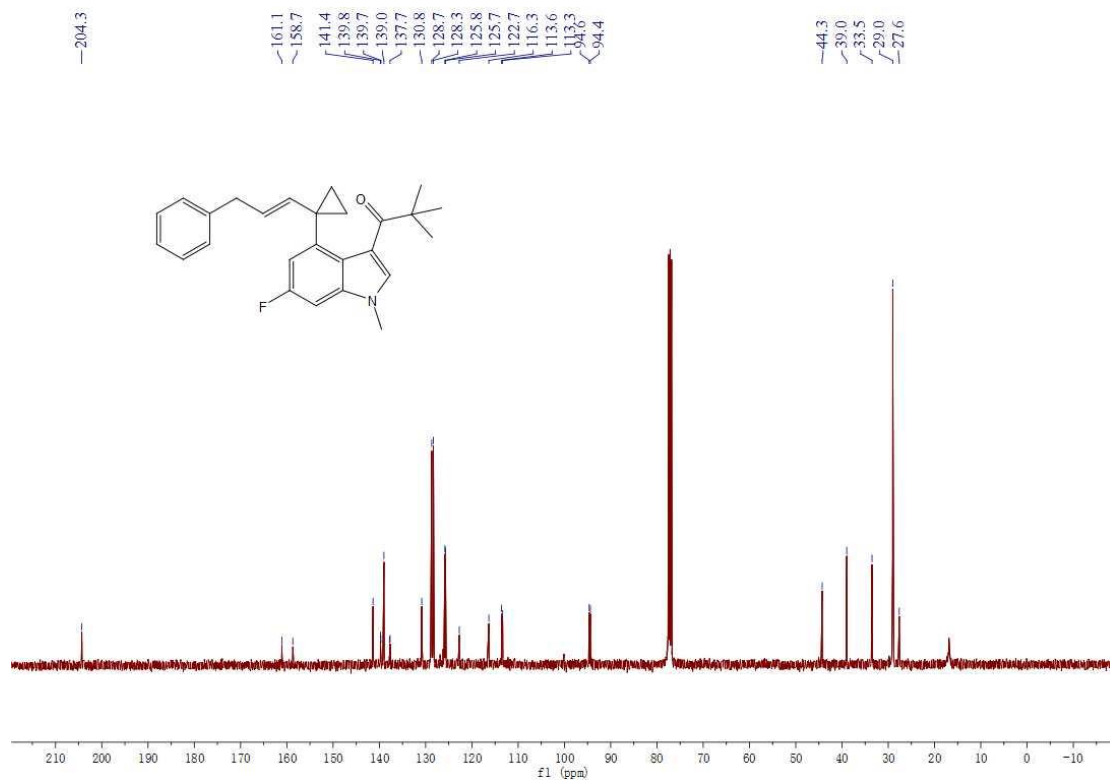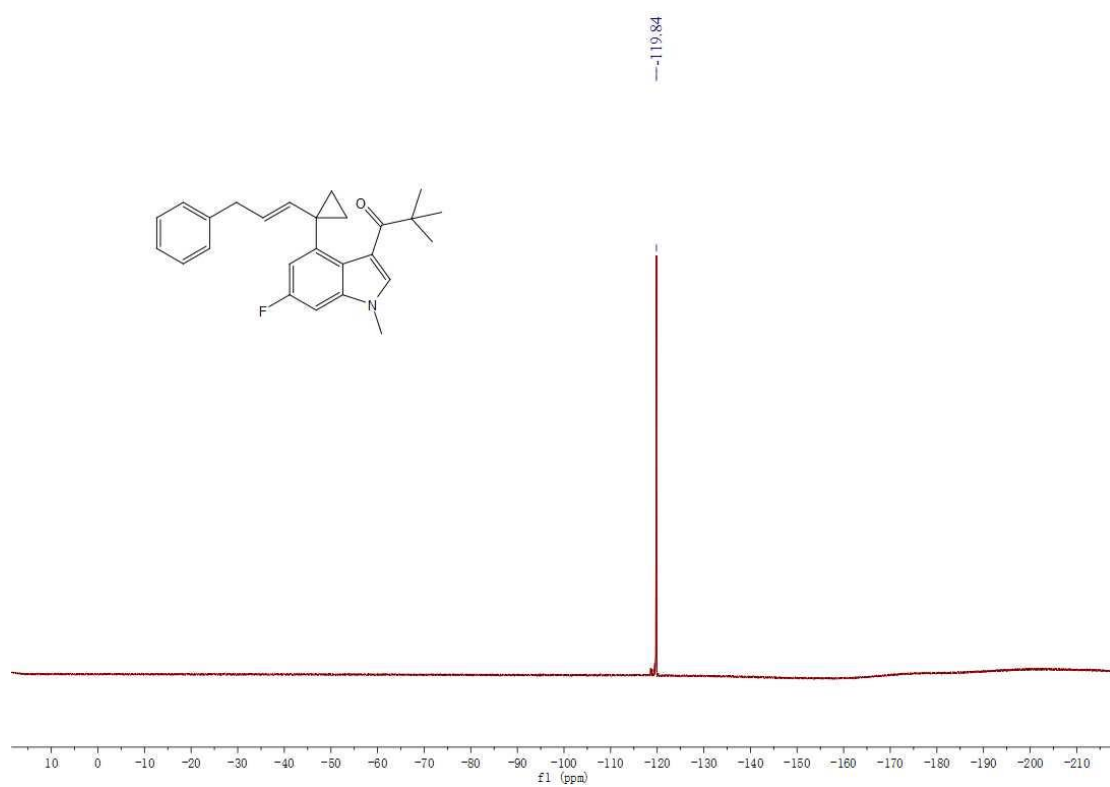

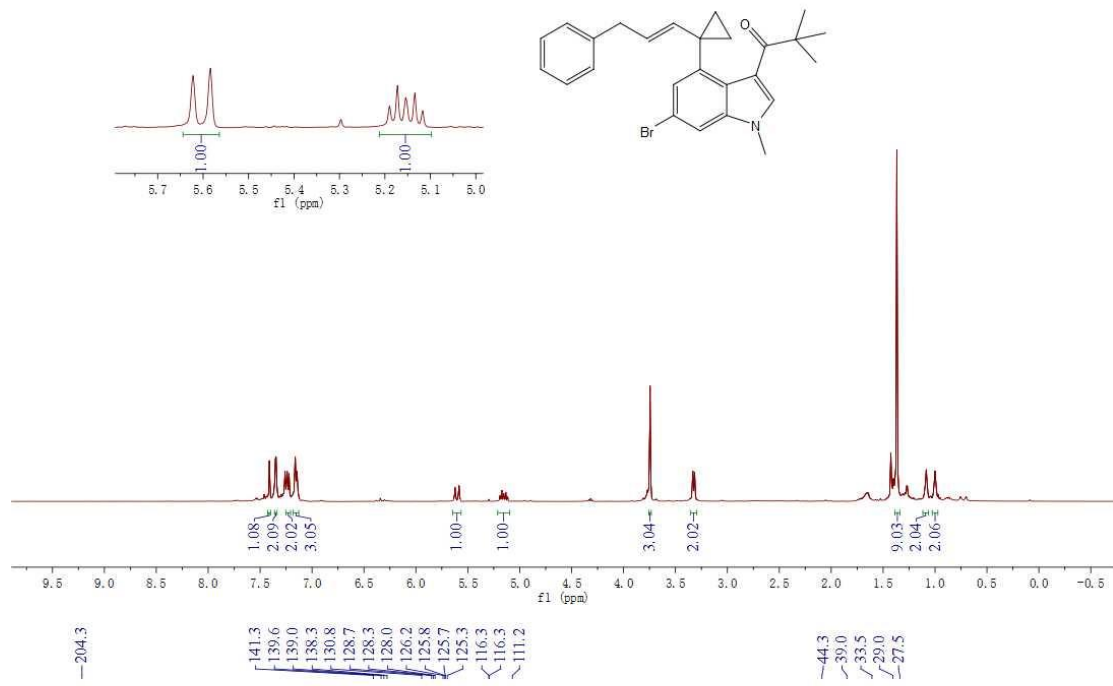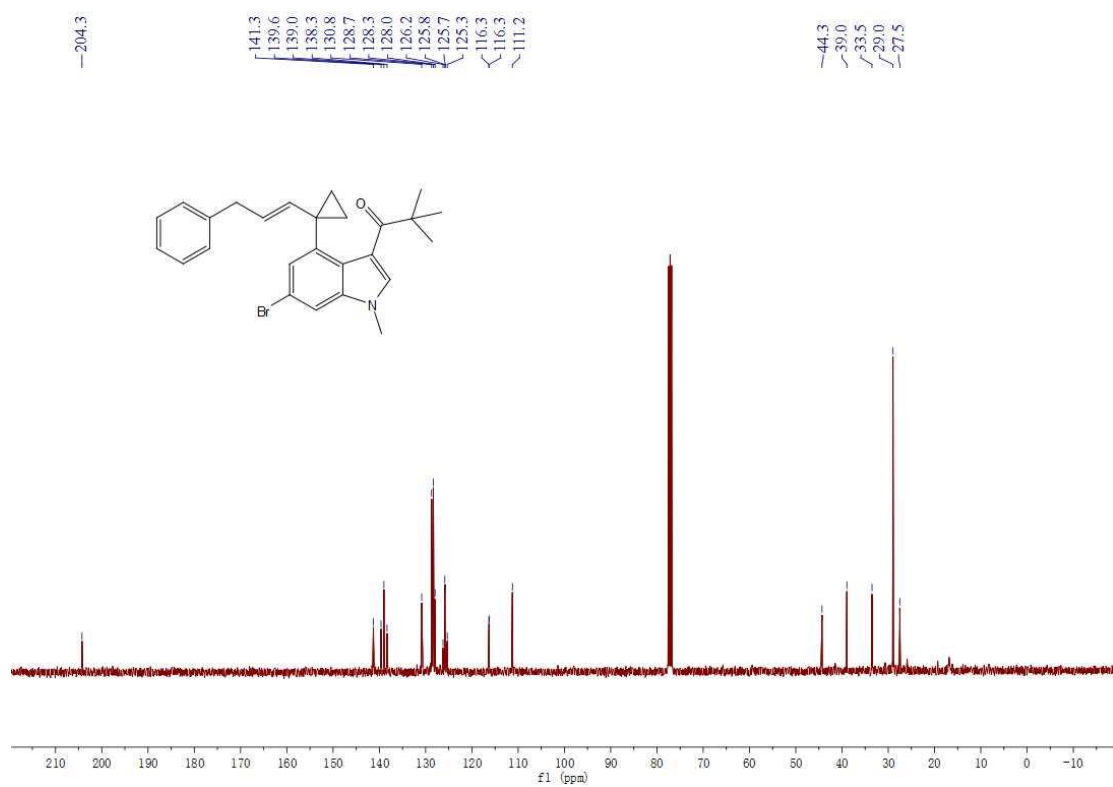

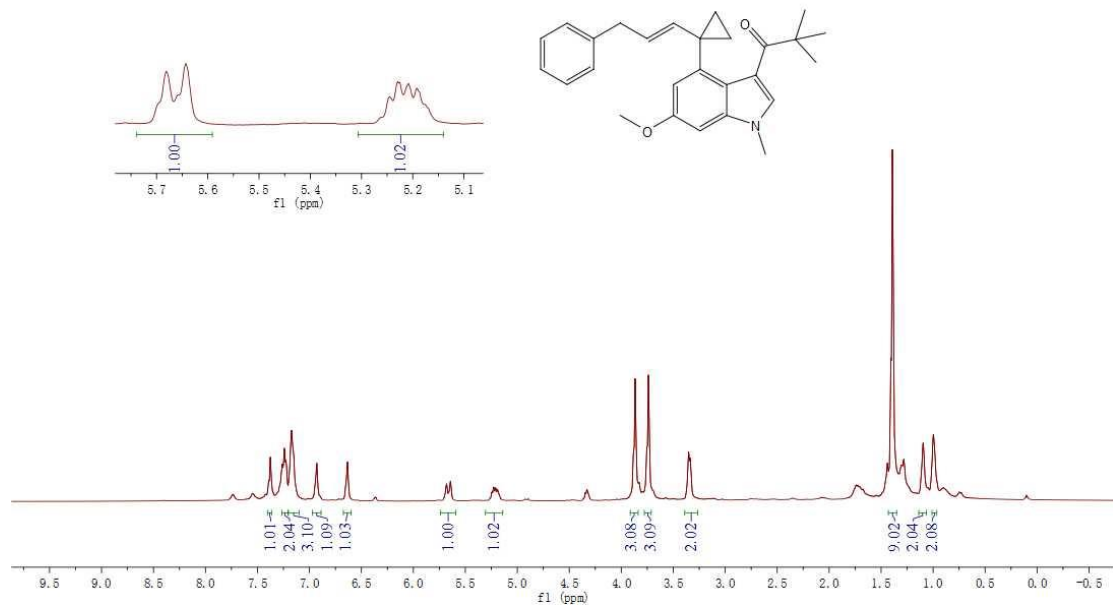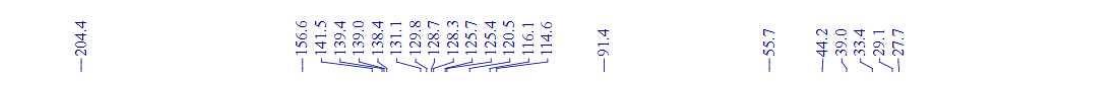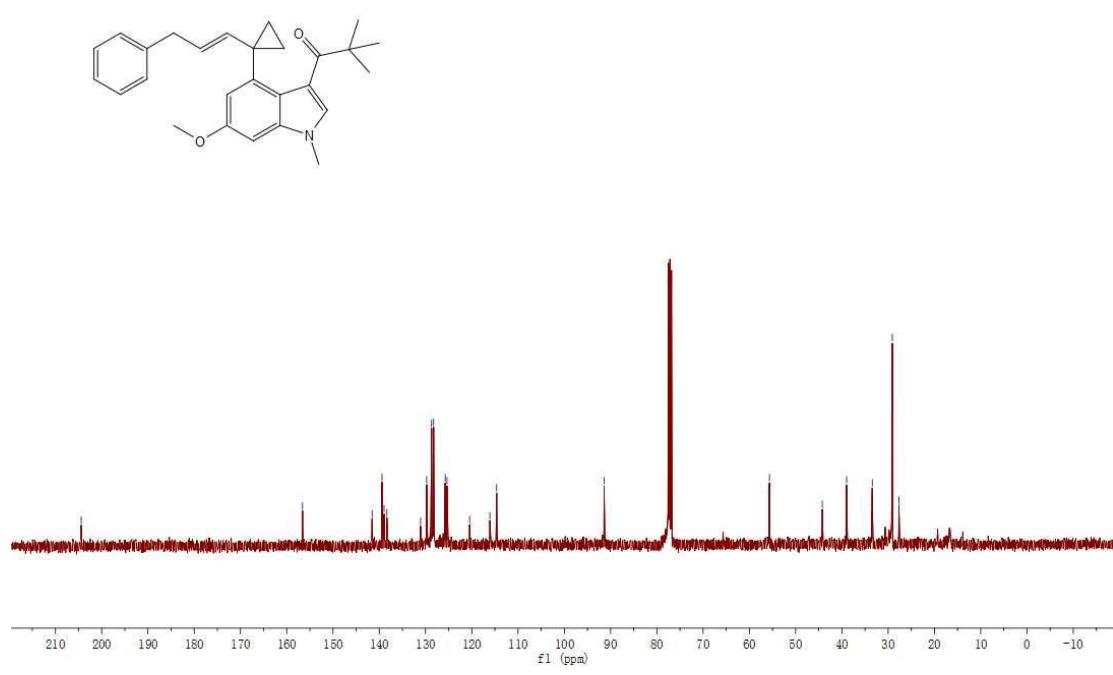

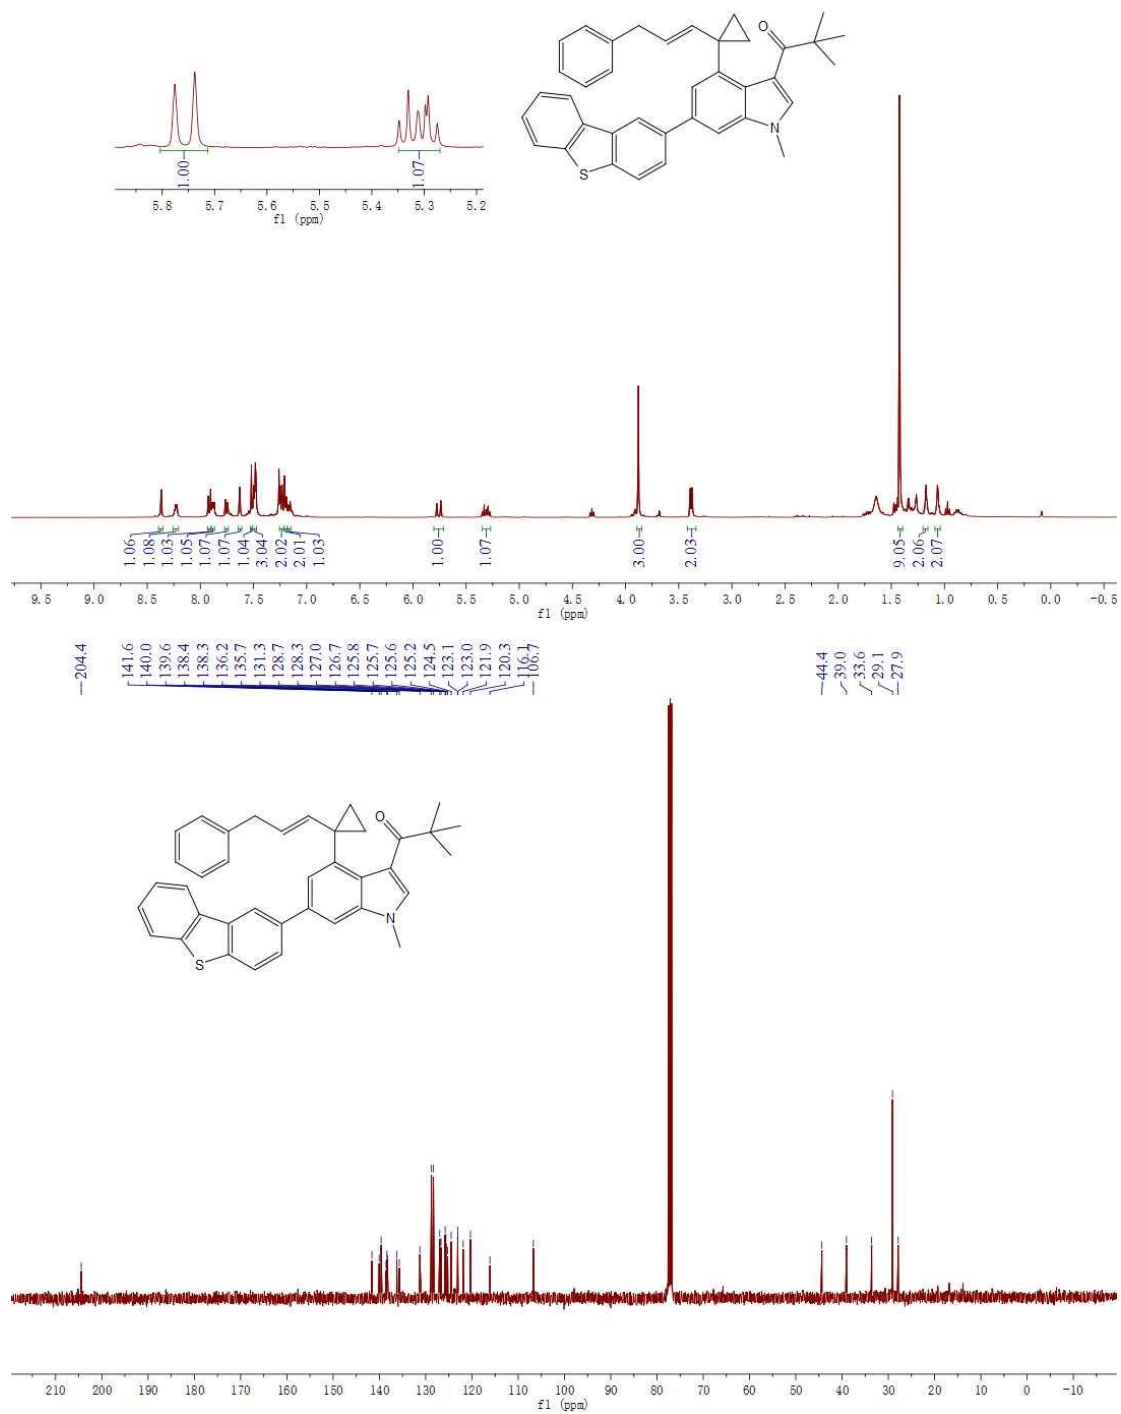

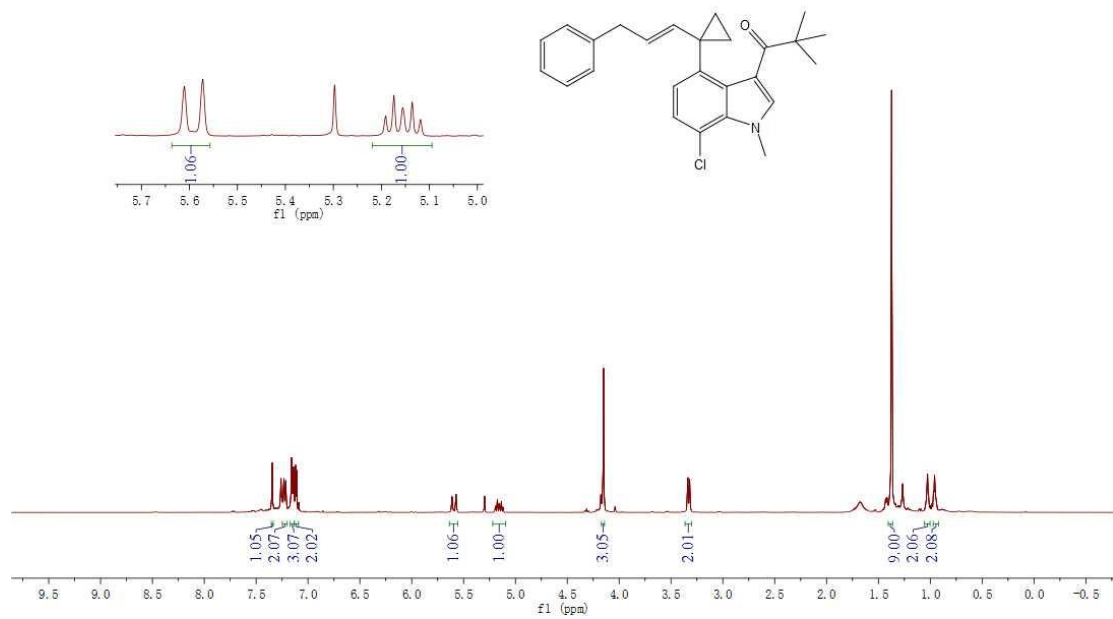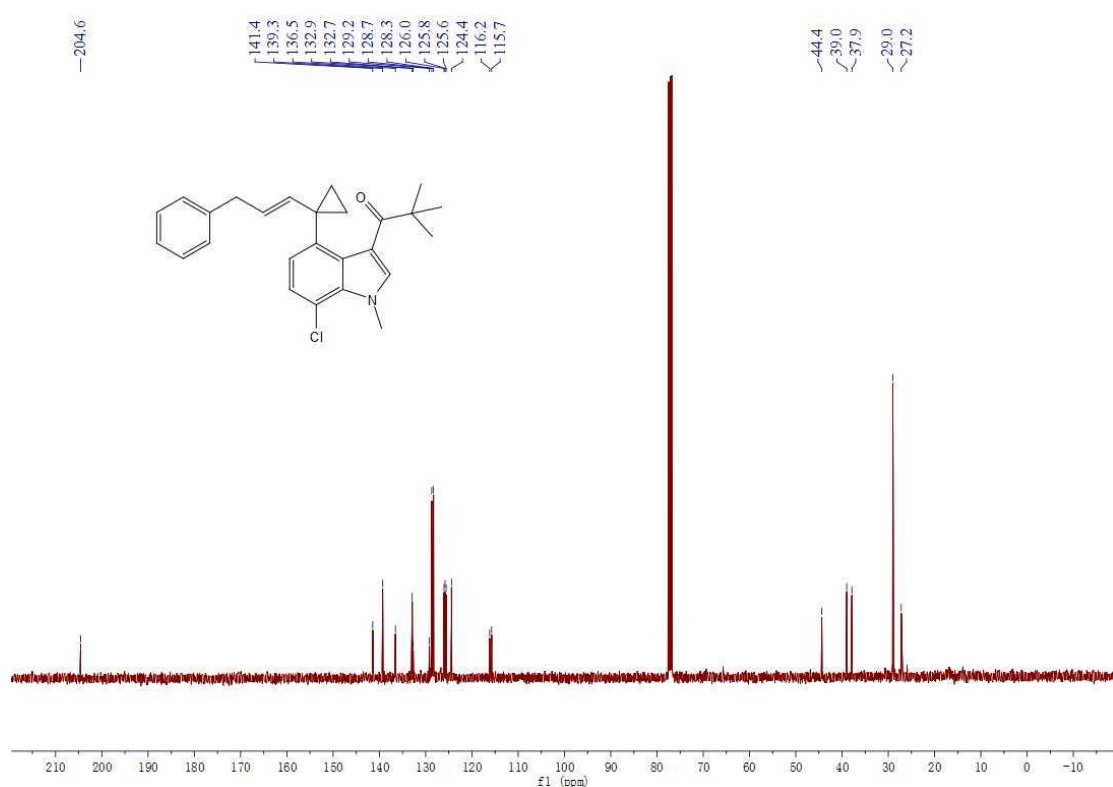

## 9. Reference

[1] J. Lv, X. Chen, X.-S. Xue, B. Zhao, Y. Liang, M. Wang, L. Jin, Y. Yuan, Y. Han, Y. Zhao, Y. Lu, J. Zhao, W.-Y. Sun, K. N. Houk and Z. Shi, Metal-free directed  $sp^2$ -C-H borylation, *Nature*, 2019, **575**, 336-341.

[2] W. Ai, Y. Liu, Q. Wang, Z. Lu, Q. Liu, Cu-Catalyzed Redox-Neutral Ring Cleavage of Cycloketone O-Acyl Oximes: Chemodivergent Access to Distal Oxygenated Nitriles. *Org. Lett.* 2018, **20**, 409-412.
